# Supplementary material for: Characterization of the Secretome of a Specific Cell Expressing Mutant Methionyl-tRNA Synthetase in Co-Culture Using Click Chemistry
Source: Int J Mol Sci. 2022 Jun 10;23(12):6527. doi: 10.3390/ijms23126527 (PMC9223471; doi:10.3390/ijms23126527)
Supplement: Supplementary file 1 [file ijms-23-06527-s001.zip › Table_S1_Shin.xlsx]

## Sheet: Table S1
Table S1. Protein profile of the MSC secretomes
Master Protein Accessions	Master Protein Descriptions	Gene	name	Normalized intensity (Good-MSC1)	Normalized intensity (Good-MSC2)	Normalized intensity (Good-MSC3)	Normalized intensity (Poor-MSC1)	Normalized intensity (Poor-MSC2)	Normalized intensity (Poor-MSC3)	#. human unique Good-MSC1	#. human unique Good-MSC2	#. human unique Good-MSC3	#. human unique Poor-MSC1	#. human unique Poor-MSC2	#. human unique Poor-MSC3	fold chage (Good-Poor)	P-value
P31025	Lipocalin-1 OS=Homo sapiens (Human) OX=9606 GN=LCN1 PE=1 SV=1	LCN1	Lipocalin-1	-1.984	-2.449	-2.639	-0.376	0.791	0.902	0	1	1	1	2	2	-2.796	0.0034897
P08758	Annexin A5 OS=Homo sapiens (Human) OX=9606 GN=ANXA5 PE=1 SV=2	ANXA5	Annexin A5	-3.262	-2.81	-3.165	-1.767	-0.962	-1.837	4	1	1	3	5	3	-1.557	0.00759775
P05556	Integrin beta-1 OS=Homo sapiens (Human) OX=9606 GN=ITGB1 PE=1 SV=2	ITGB1	Integrin beta-1	-2.454	-2.359	-2.588	-0.961	-1.649	-1.558	3	3	3	6	5	3	-1.078	0.00883528
P16860	Natriuretic peptides B OS=Homo sapiens (Human) OX=9606 GN=NPPB PE=1 SV=1	NPPB	Natriuretic peptides B	-1.37	0.85	-0.526	-3.883	-3.588	-5.243	0	1	1	0	0	0	3.889	0.00915024
O60279	Sushi domain-containing protein 5 OS=Homo sapiens (Human) OX=9606 GN=SUSD5 PE=1 SV=3	SUSD5	Sushi domain-containing protein 5	-1.906	-2.148	-2.789	-3.962	-4.835	-5.655	1	0	1	0	0	0	2.536	0.0102899
P51816	AF4/FMR2 family member 2 OS=Homo sapiens (Human) OX=9606 GN=AFF2 PE=1 SV=4	AFF2	AF4/FMR2 family member 2	-0.627	-1.851	-3.344	3.327	4.475	1.584	0	0	0	0	1	1	-5.069	0.0116339
P03956	Interstitial collagenase OS=Homo sapiens (Human) OX=9606 GN=MMP1 PE=1 SV=3	MMP1	Interstitial collagenase	3.892	3.561	2.262	5.924	5.073	5.744	16	16	15	18	15	18	-2.342	0.0139507
Q13275	Semaphorin-3F OS=Homo sapiens (Human) OX=9606 GN=SEMA3F PE=2 SV=2	SEMA3F	Semaphorin-3F	-2.137	-3.283	-3.443	-4.603	-4.945	-4.615	4	1	1	0	0	0	1.767	0.0143305
P30153	Serine/threonine-protein phosphatase 2A 65 kDa regulatory subunit A alpha isoform OS=Homo sapiens (Human) OX=9606 GN=PPP2R1A PE=1 SV=4	PPP2R1A	Serine/threonine-protein phosphatase 2A 65 kDa regulatory subunit A alpha isoform	-2.709	-3.033	-2.899	-3.441	-3.933	-4.165	5	4	5	5	2	5	0.966	0.0143922
P11464	Pregnancy-specific beta-1-glycoprotein 1 OS=Homo sapiens (Human) OX=9606 GN=PSG1 PE=1 SV=1	PSG1	Pregnancy-specific beta-1-glycoprotein 1	-1.962	-1.43	-1.979	-2.975	-3.052	-2.471	0	0	0	0	0	2	1.043	0.0152406
P16070	CD44 antigen OS=Homo sapiens (Human) OX=9606 GN=CD44 PE=1 SV=3	CD44	CD44 antigen	-2.158	-2.154	-1.628	0.381	-0.938	-0.49	6	4	6	7	6	6	-1.631	0.0185467
Q2M389	WASH complex subunit 4 OS=Homo sapiens (Human) OX=9606 GN=WASHC4 PE=1 SV=2	WASHC4	WASH complex subunit 4	4.926	5.069	4.552	3.529	4.277	3.464	2	0	2	1	2	2	1.092	0.0226818
Q5KU26	Collectin-12 OS=Homo sapiens (Human) OX=9606 GN=COLEC12 PE=1 SV=3	COLEC12	Collectin-12	-2.089	-2.655	-3.26	-4.486	-4.163	-3.712	2	2	2	0	0	0	1.452	0.023168
P25774	Cathepsin S OS=Homo sapiens (Human) OX=9606 GN=CTSS PE=1 SV=3	CTSS	Cathepsin S	1.367	1.493	1.878	3.409	2.215	2.959	7	8	9	10	9	9	-1.281	0.0281045
Q9UHD8	Septin-9 OS=Homo sapiens (Human) OX=9606 GN=SEPTIN9 PE=1 SV=2	SEPTIN9	Septin-9	-3.265	-3.981	-4.221	-1.841	-2.842	-2.593	3	1	2	5	1	2	-1.397	0.0283643
P53814	Smoothelin OS=Homo sapiens (Human) OX=9606 GN=SMTN PE=1 SV=7	SMTN	Smoothelin	-5.852	-4.329	-4.658	-3.445	-1.258	-2.43	0	0	0	0	1	1	-2.569	0.0305053
O00244	Copper transport protein ATOX1 OS=Homo sapiens (Human) OX=9606 GN=ATOX1 PE=1 SV=1	ATOX1	Copper transport protein ATOX1	-3.404	-3.175	-2.563	-2.049	-0.047	0.3	1	1	1	1	2	2	-2.449	0.0340497
Q8NCH0	Carbohydrate sulfotransferase 14 OS=Homo sapiens (Human) OX=9606 GN=CHST14 PE=1 SV=2	CHST14	Carbohydrate sulfotransferase 14	-0.403	-1.048	-0.22	-1.449	-3.556	-2.945	6	4	6	5	1	0	2.093	0.0361218
Q969G5	Caveolae-associated protein 3 OS=Homo sapiens (Human) OX=9606 GN=CAVIN3 PE=1 SV=3	CAVIN3	Caveolae-associated protein 3	-4.742	-4.589	-5.391	-2.348	-3.99	-1.713	0	0	0	1	0	1	-2.224	0.0368507
Q99733	Nucleosome assembly protein 1-like 4 OS=Homo sapiens (Human) OX=9606 GN=NAP1L4 PE=1 SV=1	NAP1L4	Nucleosome assembly protein 1-like 4	-2.738	-4.521	-4.357	-2.167	-1.512	-2.266	0	0	1	2	0	2	-1.89	0.0373546
P17812	CTP synthase 1 OS=Homo sapiens (Human) OX=9606 GN=CTPS1 PE=1 SV=2	CTPS1	CTP synthase 1	-4.654	-4.773	-4.068	-3.98	-3.446	-3.262	0	0	1	1	0	1	-0.935	0.0379432
P25685	DnaJ homolog subfamily B member 1 OS=Homo sapiens (Human) OX=9606 GN=DNAJB1 PE=1 SV=4	DNAJB1	DnaJ homolog subfamily B member 1	-2.288	-3.577	-2.35	-3.732	-4.394	-4.22	4	1	4	4	1	0	1.377	0.0412602
P42357	Histidine ammonia-lyase OS=Homo sapiens (Human) OX=9606 GN=HAL PE=1 SV=1	HAL	Histidine ammonia-lyase	-3.657	-2.532	-2.185	-3.865	-4.81	-4.212	2	3	7	0	0	1	1.504	0.0451691
Q14980	Nuclear mitotic apparatus protein 1 OS=Homo sapiens (Human) OX=9606 GN=NUMA1 PE=1 SV=2	NUMA1	Nuclear mitotic apparatus protein 1	-2.927	-3.077	-3.847	-4.155	-4.689	-4.025	1	0	0	1	0	1	1.006	0.0452175
P48307	Tissue factor pathway inhibitor 2 OS=Homo sapiens (Human) OX=9606 GN=TFPI2 PE=1 SV=1	TFPI2	Tissue factor pathway inhibitor 2	-3.568	-2.702	-3.035	-2.034	0.634	1.538	1	1	1	2	8	8	-3.148	0.0460222
P20809	Interleukin-11 OS=Homo sapiens (Human) OX=9606 GN=IL11 PE=1 SV=1	IL11	Interleukin-11	-0.424	-0.919	0.179	-1.358	-3.717	-2.435	3	3	2	3	0	1	2.115	0.0481868
Q9HCU0	Endosialin OS=Homo sapiens (Human) OX=9606 GN=CD248 PE=1 SV=1	CD248	Endosialin	-1.974	-1.279	-0.607	-0.44	0.122	0.754	3	4	5	5	8	5	-1.432	0.0523904
O95498	Vascular non-inflammatory molecule 2 OS=Homo sapiens (Human) OX=9606 GN=VNN2 PE=1 SV=3	VNN2	Vascular non-inflammatory molecule 2	1.253	3.494	3.014	0.672	-1.457	0.601	0	1	1	1	1	1	2.648	0.0532716
P31937	3-hydroxyisobutyrate dehydrogenase, mitochondrial OS=Homo sapiens (Human) OX=9606 GN=HIBADH PE=1 SV=2	HIBADH	3-hydroxyisobutyrate dehydrogenase, mitochondrial	-4.166	-3.956	-4.88	-2.371	-3.719	-3.02	0	0	0	2	0	0	-1.297	0.053612
O15232	Matrilin-3 OS=Homo sapiens (Human) OX=9606 GN=MATN3 PE=1 SV=2	MATN3	Matrilin-3	-0.88	-1.778	-1.433	-2.008	-4.126	-4.44	5	2	2	3	0	0	2.161	0.0554272
Q14956	Transmembrane glycoprotein NMB OS=Homo sapiens (Human) OX=9606 GN=GPNMB PE=1 SV=2	GPNMB	Transmembrane glycoprotein NMB	-3.972	-4.717	-5.152	-3.95	-2.091	-2.827	0	0	0	0	2	3	-1.657	0.0610047
P21980	Protein-glutamine gamma-glutamyltransferase 2 OS=Homo sapiens (Human) OX=9606 GN=TGM2 PE=1 SV=2	TGM2	Protein-glutamine gamma-glutamyltransferase 2	-3.579	-3.229	-3.977	-2.494	-2.638	-0.777	1	6	0	8	6	8	-1.625	0.062911
P23142	Fibulin-1 OS=Homo sapiens (Human) OX=9606 GN=FBLN1 PE=1 SV=4	FBLN1	Fibulin-1	1.127	0.948	0.883	1.235	2.301	2.577	9	9	8	8	14	11	-1.051	0.0646728
O60437	Periplakin OS=Homo sapiens (Human) OX=9606 GN=PPL PE=1 SV=4	PPL	Periplakin	-4.666	-5.022	-4.187	-3.388	-4.246	-3.26	0	0	0	2	0	0	-0.994	0.0647433
O94907	Dickkopf-related protein 1 OS=Homo sapiens (Human) OX=9606 GN=DKK1 PE=1 SV=1	DKK1	Dickkopf-related protein 1	-3.096	-4.165	-2.842	-2.415	-0.301	1.386	3	1	3	3	6	7	-2.924	0.0670961
O75506	Heat shock factor-binding protein 1 OS=Homo sapiens (Human) OX=9606 GN=HSBP1 PE=1 SV=1	HSBP1	Heat shock factor-binding protein 1	-2.603	-3.147	-3.622	-3.651	-4.337	-4.946	2	1	1	0	0	0	1.187	0.0672729
P21741	Midkine OS=Homo sapiens (Human) OX=9606 GN=MDK PE=1 SV=1	MDK	Midkine	-4.325	-5.313	-3.146	-2.654	1.854	-1.087	0	0	0	0	2	1	-3.632	0.0679013
P78324	Tyrosine-protein phosphatase non-receptor type substrate 1 OS=Homo sapiens (Human) OX=9606 GN=SIRPA PE=1 SV=2	SIRPA	Tyrosine-protein phosphatase non-receptor type substrate 1	-2.663	-3.341	-3.386	-3.49	-4.045	-4.227	1	3	2	1	0	0	0.791	0.0702239
P04114	Apolipoprotein B-100 OS=Homo sapiens (Human) OX=9606 GN=APOB PE=1 SV=2	APOB	Apolipoprotein B-100	1.766	2.143	1.829	1.494	1.033	0.106	7	10	10	9	9	9	1.035	0.071418
Q969D9	Thymic stromal lymphopoietin OS=Homo sapiens (Human) OX=9606 GN=TSLP PE=1 SV=1	TSLP	Thymic stromal lymphopoietin	1.084	-2.091	1.054	-1.55	-5.798	-4.571	2	0	2	1	0	0	3.989	0.0722842
O95450	A disintegrin and metalloproteinase with thrombospondin motifs 2 OS=Homo sapiens (Human) OX=9606 GN=ADAMTS2 PE=2 SV=2	ADAMTS2	A disintegrin and metalloproteinase with thrombospondin motifs 2	-2.789	-1.133	-1.117	-3.448	-2.95	-2.845	1	2	1	0	1	2	1.401	0.0747688
P10321	HLA class I histocompatibility antigen, C alpha chain OS=Homo sapiens (Human) OX=9606 GN=HLA-C PE=1 SV=3	HLA-C	HLA class I histocompatibility antigen, C alpha chain	-2.116	-0.423	0.036	-1.781	-3.522	-3.378	3	3	4	3	2	3	2.06	0.0747746
P09382	Galectin-1 OS=Homo sapiens (Human) OX=9606 GN=LGALS1 PE=1 SV=2	LGALS1	Galectin-1	1.81	1.196	1.421	2.048	2.24	3.376	5	4	5	5	6	6	-1.079	0.0752076
Q15323	Keratin, type I cuticular Ha1 OS=Homo sapiens (Human) OX=9606 GN=KRT31 PE=1 SV=3	KRT31	Keratin, type I cuticular Ha1	-3.155	-2.066	-0.192	-4.582	-3.066	-5.069	0	1	2	0	0	0	2.435	0.0822308
P98082	Disabled homolog 2 OS=Homo sapiens (Human) OX=9606 GN=DAB2 PE=1 SV=3	DAB2	Disabled homolog 2	-3.281	-4.579	-3.531	-4.606	-5.266	-4.638	2	0	0	1	0	0	1.039	0.0830079
P68871	Hemoglobin subunit beta OS=Homo sapiens (Human) OX=9606 GN=HBB PE=1 SV=2	HBB	Hemoglobin subunit beta	-2.156	2.099	0.825	-2.099	-3.382	-2.812	2	4	4	2	1	2	3.02	0.0831571
Q10471	Polypeptide N-acetylgalactosaminyltransferase 2 OS=Homo sapiens (Human) OX=9606 GN=GALNT2 PE=1 SV=1	GALNT2	Polypeptide N-acetylgalactosaminyltransferase 2	-1.536	-2.473	-2.389	-2.498	-3.404	-3.482	8	4	5	5	4	1	0.995	0.0840953
Q15185	Prostaglandin E synthase 3 OS=Homo sapiens (Human) OX=9606 GN=PTGES3 PE=1 SV=1	PTGES3	Prostaglandin E synthase 3	-3.325	-3.325	-4.18	-1.496	-3.031	-2.635	1	1	2	4	3	3	-1.223	0.0866375
P18583	Protein SON OS=Homo sapiens (Human) OX=9606 GN=SON PE=1 SV=4	SON	Protein SON	-2.545	-3.485	-2.657	-3.197	-4.806	-4.736	2	0	0	1	0	0	1.351	0.0885937
Q9C075	Keratin, type I cytoskeletal 23 OS=Homo sapiens (Human) OX=9606 GN=KRT23 PE=1 SV=2	KRT23	Keratin, type I cytoskeletal 23	-4.044	-3.412	-2.158	-4.588	-4.774	-4.162	0	1	4	1	1	1	1.303	0.0890548
Q14192	Four and a half LIM domains protein 2 OS=Homo sapiens (Human) OX=9606 GN=FHL2 PE=1 SV=3	FHL2	Four and a half LIM domains protein 2	-3.222	-3.914	-2.88	-2.686	-2.776	-2.29	2	0	3	3	3	4	-0.755	0.0898856
P55268	Laminin subunit beta-2 OS=Homo sapiens (Human) OX=9606 GN=LAMB2 PE=1 SV=2	LAMB2	Laminin subunit beta-2	-2.877	-3.3	-3.728	-3.531	-4.631	-4.608	6	4	7	11	0	1	0.955	0.094885
P48163	NADP-dependent malic enzyme OS=Homo sapiens (Human) OX=9606 GN=ME1 PE=1 SV=1	ME1	NADP-dependent malic enzyme	-2.156	-2.196	-2.29	-2.387	-3.234	-3.911	2	2	5	4	1	1	0.964	0.0950215
P10619	Lysosomal protective protein OS=Homo sapiens (Human) OX=9606 GN=CTSA PE=1 SV=2	CTSA	Lysosomal protective protein	-0.37	-0.789	0.735	0.836	0.721	2.012	3	2	4	4	5	6	-1.331	0.0959043
Q86UE8	Serine/threonine-protein kinase tousled-like 2 OS=Homo sapiens (Human) OX=9606 GN=TLK2 PE=1 SV=2	TLK2	Serine/threonine-protein kinase tousled-like 2	-0.863	0.812	-0.194	-0.495	-3.394	-3.148	1	0	0	1	0	0	2.264	0.0968713
P52565	Rho GDP-dissociation inhibitor 1 OS=Homo sapiens (Human) OX=9606 GN=ARHGDIA PE=1 SV=3	ARHGDIA	Rho GDP-dissociation inhibitor 1	-0.347	-1.52	-2.03	-1.722	-3.967	-3.784	3	1	1	2	1	1	1.859	0.100987
Q63ZY3	KN motif and ankyrin repeat domain-containing protein 2 OS=Homo sapiens (Human) OX=9606 GN=KANK2 PE=1 SV=1	KANK2	KN motif and ankyrin repeat domain-containing protein 2	-2.51	-1.969	-1.974	-2.295	-4.166	-4.491	0	0	0	2	0	0	1.5	0.10136
P02790	Hemopexin OS=Homo sapiens (Human) OX=9606 GN=HPX PE=1 SV=2	HPX	Hemopexin	-3.739	-3.292	-3.807	-3.414	0.553	1.076	1	1	0	1	1	2	-3.018	0.101938
P54687	Branched-chain-amino-acid aminotransferase, cytosolic OS=Homo sapiens (Human) OX=9606 GN=BCAT1 PE=1 SV=3	BCAT1	Branched-chain-amino-acid aminotransferase, cytosolic	-0.568	-3.294	-0.826	-2.931	-3.477	-4.201	2	0	2	2	0	0	1.973	0.104672
P29279	CCN family member 2 OS=Homo sapiens (Human) OX=9606 GN=CCN2 PE=1 SV=2	CCN2	CCN family member 2	-1.239	-1.06	-1.048	-0.998	2.455	2.891	4	4	4	4	15	13	-2.565	0.105749
Q96JB6	Lysyl oxidase homolog 4 OS=Homo sapiens (Human) OX=9606 GN=LOXL4 PE=1 SV=1	LOXL4	Lysyl oxidase homolog 4	-3.173	-4.518	-2.507	-2.404	-1.605	-2.208	1	0	2	1	2	2	-1.327	0.106289
P98095	Fibulin-2 OS=Homo sapiens (Human) OX=9606 GN=FBLN2 PE=1 SV=2	FBLN2	Fibulin-2	-3.263	-3.629	-3.758	-3.673	-4.315	-4.198	0	2	1	1	0	1	0.512	0.106425
O94813	Slit homolog 2 protein OS=Homo sapiens (Human) OX=9606 GN=SLIT2 PE=1 SV=1	SLIT2	Slit homolog 2 protein	-0.434	-2.686	-1.144	-1.957	-4.779	-4.423	12	1	10	7	1	0	2.298	0.106903
P10646	Tissue factor pathway inhibitor OS=Homo sapiens (Human) OX=9606 GN=TFPI PE=1 SV=1	TFPI	Tissue factor pathway inhibitor	-3.281	-3.005	-3.086	-3.023	-0.75	-0.18	1	1	2	2	6	5	-1.807	0.107063
P45452	Collagenase 3 OS=Homo sapiens (Human) OX=9606 GN=MMP13 PE=1 SV=1	MMP13	Collagenase 3	-1.355	-3.466	-3.811	-4.26	-4.968	-4.362	4	0	0	0	0	0	1.653	0.10726
O60507	Protein-tyrosine sulfotransferase 1 OS=Homo sapiens (Human) OX=9606 GN=TPST1 PE=1 SV=1	TPST1	Protein-tyrosine sulfotransferase 1	-2.193	-2.63	-1.601	-2.289	-4.505	-4.578	2	1	4	3	0	0	1.65	0.110724
P29692	Elongation factor 1-delta OS=Homo sapiens (Human) OX=9606 GN=EEF1D PE=1 SV=5	EEF1D	Elongation factor 1-delta	-1.979	-2.656	-1.093	-3.48	-3.835	-2.324	5	3	5	5	3	5	1.303	0.112406
P11233	Ras-related protein Ral-A OS=Homo sapiens (Human) OX=9606 GN=RALA PE=1 SV=1	RALA	Ras-related protein Ral-A	-3.847	-1.958	-2.213	-3.294	-4.414	-4.926	0	1	2	1	0	0	1.539	0.113881
P49458	Signal recognition particle 9 kDa protein OS=Homo sapiens (Human) OX=9606 GN=SRP9 PE=1 SV=2	SRP9	Signal recognition particle 9 kDa protein	-1.907	-3.279	-2.467	-1.921	-1.766	-0.862	2	0	1	2	2	2	-1.034	0.11628
P42830	C-X-C motif chemokine 5 OS=Homo sapiens (Human) OX=9606 GN=CXCL5 PE=1 SV=1	CXCL5	C-X-C motif chemokine 5	0.966	0.724	1.094	1.179	3.088	4.806	1	1	1	1	3	3	-2.096	0.117432
P55058	Phospholipid transfer protein OS=Homo sapiens (Human) OX=9606 GN=PLTP PE=1 SV=1	PLTP	Phospholipid transfer protein	-2.33	-0.766	-1.342	-1.728	-4.285	-3.897	1	2	2	1	1	1	1.824	0.117585
Q9ULX6	A-kinase anchor protein 8-like OS=Homo sapiens (Human) OX=9606 GN=AKAP8L PE=1 SV=4	AKAP8L	A-kinase anchor protein 8-like	-4.344	-4.091	-3.792	-5.001	-4.189	-5.508	0	0	2	0	0	0	0.824	0.118796
P40227	T-complex protein 1 subunit zeta OS=Homo sapiens (Human) OX=9606 GN=CCT6A PE=1 SV=3	CCT6A	T-complex protein 1 subunit zeta	-2.454	-3.168	-3.2	-1.091	-2.748	-1.803	6	3	6	6	4	6	-1.06	0.120266
P05089	Arginase-1 OS=Homo sapiens (Human) OX=9606 GN=ARG1 PE=1 SV=2	ARG1	Arginase-1	-1.842	-1.327	-0.164	-1.518	-2.984	-2.867	6	5	8	6	4	7	1.345	0.120471
P02774	Vitamin D-binding protein OS=Homo sapiens (Human) OX=9606 GN=GC PE=1 SV=2	GC	Vitamin D-binding protein	-3.309	-3.787	-3.118	-3.197	1.649	4.567	1	0	2	2	6	7	-4.411	0.12428
Q9UM22	Mammalian ependymin-related protein 1 OS=Homo sapiens (Human) OX=9606 GN=EPDR1 PE=1 SV=2	EPDR1	Mammalian ependymin-related protein 1	-4.934	-5.168	-3.654	-3.389	-4.06	-3.149	0	0	0	0	0	2	-1.053	0.124975
O14602	Eukaryotic translation initiation factor 1A, Y-chromosomal OS=Homo sapiens (Human) OX=9606 GN=EIF1AY PE=1 SV=4	EIF1AY	Eukaryotic translation initiation factor 1A, Y-chromosomal	-3.052	-2.025	-3.011	-3.397	-3.419	-3.238	2	1	2	2	2	1	0.655	0.126526
Q9UMX5	Neudesin OS=Homo sapiens (Human) OX=9606 GN=NENF PE=1 SV=1	NENF	Neudesin	0.184	-1.36	-2.427	-2.532	-2.887	-2.602	2	1	1	1	2	2	1.472	0.12672
P08727	Keratin, type I cytoskeletal 19 OS=Homo sapiens (Human) OX=9606 GN=KRT19 PE=1 SV=4	KRT19	Keratin, type I cytoskeletal 19	-3.85	-4.466	-3.903	-2.959	-3.693	-1.222	0	0	2	2	1	4	-1.448	0.12887
P01034	Cystatin-C OS=Homo sapiens (Human) OX=9606 GN=CST3 PE=1 SV=1	CST3	Cystatin-C	2.191	3.085	3.32	3.05	4.812	6.036	5	5	5	5	6	6	-1.767	0.130929
P13686	Tartrate-resistant acid phosphatase type 5 OS=Homo sapiens (Human) OX=9606 GN=ACP5 PE=1 SV=3	ACP5	Tartrate-resistant acid phosphatase type 5	-4.393	-4.863	-5.06	-4.842	-2.208	-2.106	0	0	0	0	0	3	-1.72	0.133981
P32119	Peroxiredoxin-2 OS=Homo sapiens (Human) OX=9606 GN=PRDX2 PE=1 SV=5	PRDX2	Peroxiredoxin-2	1.995	0.953	2.608	1.848	-1.878	-1.971	6	5	6	6	5	4	2.519	0.134951
Q05519	Serine/arginine-rich splicing factor 11 OS=Homo sapiens (Human) OX=9606 GN=SRSF11 PE=1 SV=1	SRSF11	Serine/arginine-rich splicing factor 11	-0.933	-1.334	-2.189	-1.512	-4.361	-5.316	1	1	1	1	0	0	2.245	0.134978
P42330	Aldo-keto reductase family 1 member C3 OS=Homo sapiens (Human) OX=9606 GN=AKR1C3 PE=1 SV=4	AKR1C3	Aldo-keto reductase family 1 member C3	-0.86	-0.343	-0.793	-0.59	-3.068	-3.631	2	1	1	1	1	0	1.764	0.136247
P07195	L-lactate dehydrogenase B chain OS=Homo sapiens (Human) OX=9606 GN=LDHB PE=1 SV=2	LDHB	L-lactate dehydrogenase B chain	-2.603	-2.044	-1.472	-2.288	-4.212	-3.198	6	4	9	8	3	4	1.193	0.13787
P55287	Cadherin-11 OS=Homo sapiens (Human) OX=9606 GN=CDH11 PE=1 SV=2	CDH11	Cadherin-11	0.443	0.18	1.968	0.572	-2.263	-1.255	14	11	17	12	10	9	1.846	0.138588
Q15019	Septin-2 OS=Homo sapiens (Human) OX=9606 GN=SEPTIN2 PE=1 SV=1	SEPTIN2	Septin-2	-2.717	-3.466	-2.837	-3.302	-4.383	-3.552	6	4	8	6	1	2	0.739	0.13916
P36578	60S ribosomal protein L4 OS=Homo sapiens (Human) OX=9606 GN=RPL4 PE=1 SV=5	RPL4	60S ribosomal protein L4	-0.537	-1.045	-0.983	-0.793	-3.107	-2.528	6	6	6	7	4	6	1.288	0.145459
P13591	Neural cell adhesion molecule 1 OS=Homo sapiens (Human) OX=9606 GN=NCAM1 PE=1 SV=3	NCAM1	Neural cell adhesion molecule 1	-1.971	-2.559	-2.469	-2.289	-4.051	-4.835	4	5	4	6	4	3	1.393	0.146724
P26927	Hepatocyte growth factor-like protein OS=Homo sapiens (Human) OX=9606 GN=MST1 PE=1 SV=2	MST1	Hepatocyte growth factor-like protein	-2.498	-2.35	-2.876	-2.751	0.603	1.839	1	1	1	1	6	6	-2.472	0.147812
P99999	Cytochrome c OS=Homo sapiens (Human) OX=9606 GN=CYCS PE=1 SV=2	CYCS	Cytochrome c	-3.455	-3.074	-2.499	-2.69	-2.285	-1.09	1	1	1	2	2	2	-0.988	0.149766
Q99941	Cyclic AMP-dependent transcription factor ATF-6 beta OS=Homo sapiens (Human) OX=9606 GN=ATF6B PE=1 SV=2	ATF6B	Cyclic AMP-dependent transcription factor ATF-6 beta	-0.7	-1.876	-1.76	-1.455	-4.369	-6.334	1	0	0	1	0	0	2.607	0.149973
O75312	Zinc finger protein ZPR1 OS=Homo sapiens (Human) OX=9606 GN=ZPR1 PE=1 SV=1	ZPR1	Zinc finger protein ZPR1	-2.575	-2.301	-1.626	-2.119	-4.551	-4.076	2	1	5	5	0	0	1.415	0.150095
Q16270	Insulin-like growth factor-binding protein 7 OS=Homo sapiens (Human) OX=9606 GN=IGFBP7 PE=1 SV=1	IGFBP7	Insulin-like growth factor-binding protein 7	-2.208	-1.944	-0.948	-1.779	1.131	2.211	4	4	5	4	10	8	-2.221	0.150684
O95633	Follistatin-related protein 3 OS=Homo sapiens (Human) OX=9606 GN=FSTL3 PE=1 SV=1	FSTL3	Follistatin-related protein 3	-4.89	-3.972	-4.364	-4.74	0.2	1.38	0	0	0	0	4	4	-3.355	0.151063
P48643	T-complex protein 1 subunit epsilon OS=Homo sapiens (Human) OX=9606 GN=CCT5 PE=1 SV=1	CCT5	T-complex protein 1 subunit epsilon	-2.736	-2.861	-2.138	-2.586	-3.8	-3.796	4	1	7	7	3	5	0.815	0.15184
Q9UEU0	Vesicle transport through interaction with t-SNAREs homolog 1B OS=Homo sapiens (Human) OX=9606 GN=VTI1B PE=1 SV=3	VTI1B	Vesicle transport through interaction with t-SNAREs homolog 1B	0.019	-0.94	-0.226	-0.059	-5.387	-4.585	1	0	1	1	0	0	2.961	0.153355
P04196	Histidine-rich glycoprotein OS=Homo sapiens (Human) OX=9606 GN=HRG PE=1 SV=1	HRG	Histidine-rich glycoprotein	-0.423	2.33	1.499	-0.05	-0.487	-0.396	1	2	2	1	1	1	1.446	0.154793
P07477	Trypsin-1 OS=Homo sapiens (Human) OX=9606 GN=PRSS1 PE=1 SV=1	PRSS1	Trypsin-1	6.558	6.286	6.203	5.843	4.6	6.107	2	2	2	2	2	1	0.832	0.155973
P12724	Eosinophil cationic protein OS=Homo sapiens (Human) OX=9606 GN=RNASE3 PE=1 SV=2	RNASE3	Eosinophil cationic protein	-2.834	-4.215	-3.964	-3.874	-0.265	0.225	0	0	0	0	3	2	-2.366	0.156918
P00747	Plasminogen OS=Homo sapiens (Human) OX=9606 GN=PLG PE=1 SV=2	PLG	Plasminogen	-3.374	-3.234	-3.772	-3.946	2.423	1.569	0	0	0	0	5	3	-3.475	0.157643
P11766	Alcohol dehydrogenase class-3 OS=Homo sapiens (Human) OX=9606 GN=ADH5 PE=1 SV=4	ADH5	Alcohol dehydrogenase class-3	-0.38	-0.788	-1.966	-1.301	-2.482	-3.594	2	1	1	1	0	1	1.414	0.157698
P36955	Pigment epithelium-derived factor OS=Homo sapiens (Human) OX=9606 GN=SERPINF1 PE=1 SV=4	SERPINF1	Pigment epithelium-derived factor	0.483	-0.511	1.576	0.406	-1.993	-2.364	9	9	10	9	7	4	1.833	0.157901
P49767	Vascular endothelial growth factor C OS=Homo sapiens (Human) OX=9606 GN=VEGFC PE=1 SV=1	VEGFC	Vascular endothelial growth factor C	-2.347	-2.282	-2.611	-2.426	-0.176	-1.215	3	3	4	2	7	5	-1.141	0.157918
P13646	Keratin, type I cytoskeletal 13 OS=Homo sapiens (Human) OX=9606 GN=KRT13 PE=1 SV=4	KRT13	Keratin, type I cytoskeletal 13	-3.86	-1.398	0.504	-3.335	-4.258	-3.86	0	2	5	1	0	1	2.233	0.158793
Q12841	Follistatin-related protein 1 OS=Homo sapiens (Human) OX=9606 GN=FSTL1 PE=1 SV=1	FSTL1	Follistatin-related protein 1	0.513	-0.907	-0.862	-0.309	1.432	2.49	6	3	6	5	10	10	-1.623	0.15928
P61758	Prefoldin subunit 3 OS=Homo sapiens (Human) OX=9606 GN=VBP1 PE=1 SV=4	VBP1	Prefoldin subunit 3	-3.047	-3.133	-1.96	-2.892	-4.499	-3.855	2	1	2	4	0	0	1.035	0.159697
O00754	Lysosomal alpha-mannosidase OS=Homo sapiens (Human) OX=9606 GN=MAN2B1 PE=1 SV=3	MAN2B1	Lysosomal alpha-mannosidase	-3.292	-1.815	-1.852	-2.61	-4.388	-3.618	4	5	7	6	1	3	1.219	0.160281
Q8WWM7	Ataxin-2-like protein OS=Homo sapiens (Human) OX=9606 GN=ATXN2L PE=1 SV=2	ATXN2L	Ataxin-2-like protein	-3.173	-4.331	-4.113	-3.298	-1.998	-3.378	1	0	1	2	0	0	-0.981	0.161043
P09341	Growth-regulated alpha protein OS=Homo sapiens (Human) OX=9606 GN=CXCL1 PE=1 SV=1	CXCL1	Growth-regulated alpha protein	-0.946	1.823	1.346	0.954	4.011	6.011	2	1	2	2	4	4	-2.918	0.161343
P04053	DNA nucleotidylexotransferase OS=Homo sapiens (Human) OX=9606 GN=DNTT PE=1 SV=3	DNTT	DNA nucleotidylexotransferase	2.68	1.102	2.258	2.321	-4.611	-2.482	1	1	1	1	0	0	3.604	0.161828
Q03405	Urokinase plasminogen activator surface receptor OS=Homo sapiens (Human) OX=9606 GN=PLAUR PE=1 SV=1	PLAUR	Urokinase plasminogen activator surface receptor	-3.363	-3.749	-3.857	-3.516	-2.604	-3.258	1	1	1	1	1	2	-0.53	0.162438
Q5K651	Sterile alpha motif domain-containing protein 9 OS=Homo sapiens (Human) OX=9606 GN=SAMD9 PE=1 SV=1	SAMD9	Sterile alpha motif domain-containing protein 9	-3.843	-4.115	-4.334	-2.799	-4.16	-3.088	0	0	0	2	1	1	-0.748	0.16254
Q99623	Prohibitin-2 OS=Homo sapiens (Human) OX=9606 GN=PHB2 PE=1 SV=2	PHB2	Prohibitin-2	-5.305	-4.427	-4.553	-4.206	-4.107	-1.958	0	0	0	0	0	2	-1.338	0.162602
Q9Y617	Phosphoserine aminotransferase OS=Homo sapiens (Human) OX=9606 GN=PSAT1 PE=1 SV=2	PSAT1	Phosphoserine aminotransferase	0.091	-1.476	-1.69	-0.916	-4.28	-4.328	6	1	4	6	0	0	2.15	0.163474
P02765	Alpha-2-HS-glycoprotein OS=Homo sapiens (Human) OX=9606 GN=AHSG PE=1 SV=2	AHSG	Alpha-2-HS-glycoprotein	-0.029	0.756	-0.151	-0.378	5.532	7.305	2	3	2	3	4	5	-3.961	0.165766
P13929	Beta-enolase OS=Homo sapiens (Human) OX=9606 GN=ENO3 PE=1 SV=5	ENO3	Beta-enolase	-1.599	-4.361	-3.642	-4.151	-5.148	-4.752	3	3	1	1	1	0	1.483	0.166
P04156	Major prion protein OS=Homo sapiens (Human) OX=9606 GN=PRNP PE=1 SV=1	PRNP	Major prion protein	0.1	0.843	-0.136	0.198	3.184	5.925	1	1	1	1	3	3	-2.834	0.166903
Q9NP84	Tumor necrosis factor receptor superfamily member 12A OS=Homo sapiens (Human) OX=9606 GN=TNFRSF12A PE=1 SV=1	TNFRSF12A	Tumor necrosis factor receptor superfamily member 12A	1.778	-3.449	-6.297	-0.044	2.849	1.877	1	1	1	1	1	1	-4.216	0.168633
P05413	Fatty acid-binding protein, heart OS=Homo sapiens (Human) OX=9606 GN=FABP3 PE=1 SV=4	FABP3	Fatty acid-binding protein, heart	-1.46	-2.045	-0.68	-1.059	-5.273	-4.945	1	2	1	3	0	2	2.364	0.168898
Q5D862	Filaggrin-2 OS=Homo sapiens (Human) OX=9606 GN=FLG2 PE=1 SV=1	FLG2	Filaggrin-2	-3.192	-0.321	-0.17	-2.762	-2.952	-2.881	3	5	7	3	4	3	1.637	0.171656
P20908	Collagen alpha-1(V) chain OS=Homo sapiens (Human) OX=9606 GN=COL5A1 PE=1 SV=3	COL5A1	Collagen alpha-1(V) chain	-0.077	-1.726	1.923	-0.592	-3.032	-2.76	14	5	20	11	3	4	2.168	0.17262
P23470	Receptor-type tyrosine-protein phosphatase gamma OS=Homo sapiens (Human) OX=9606 GN=PTPRG PE=1 SV=4	PTPRG	Receptor-type tyrosine-protein phosphatase gamma	-0.687	-3.397	-2.433	-3.372	-3.747	-3.387	5	1	1	3	0	1	1.33	0.172907
P52823	Stanniocalcin-1 OS=Homo sapiens (Human) OX=9606 GN=STC1 PE=1 SV=1	STC1	Stanniocalcin-1	1.328	1.859	1.595	3.216	1.554	4.971	6	5	5	6	7	7	-1.653	0.173103
O43184	Disintegrin and metalloproteinase domain-containing protein 12 OS=Homo sapiens (Human) OX=9606 GN=ADAM12 PE=1 SV=3	ADAM12	Disintegrin and metalloproteinase domain-containing protein 12	-3.522	-4.805	0.299	-0.122	0.479	-0.68	1	0	1	0	1	0	-2.568	0.176997
Q96TA1	Protein Niban 2 OS=Homo sapiens (Human) OX=9606 GN=NIBAN2 PE=1 SV=3	NIBAN2	Protein Niban 2	-4.858	-4.319	-3.996	-1.21	-4.231	-3.212	1	1	1	2	0	1	-1.507	0.177555
P27695	DNA-(apurinic or apyrimidinic site) lyase OS=Homo sapiens (Human) OX=9606 GN=APEX1 PE=1 SV=2	APEX1	DNA-(apurinic or apyrimidinic site) lyase	-2.678	-3.157	-3.547	-3.329	-1.106	0.011	1	0	1	0	0	2	-1.653	0.178096
Q7RTV2	Glutathione S-transferase A5 OS=Homo sapiens (Human) OX=9606 GN=GSTA5 PE=1 SV=1	GSTA5	Glutathione S-transferase A5	3.267	3.751	3.753	3.433	3.092	3.319	1	1	1	1	1	1	0.309	0.179808
P05387	60S acidic ribosomal protein P2 OS=Homo sapiens (Human) OX=9606 GN=RPLP2 PE=1 SV=1	RPLP2	60S acidic ribosomal protein P2	1.37	0.609	1.166	1.373	-1.362	-2.11	5	3	4	4	3	2	1.748	0.181664
P04004	Vitronectin OS=Homo sapiens (Human) OX=9606 GN=VTN PE=1 SV=1	VTN	Vitronectin	-1.563	-1.648	0.201	-0.946	-3.7	-3.635	1	2	3	1	1	0	1.757	0.181929
P22692	Insulin-like growth factor-binding protein 4 OS=Homo sapiens (Human) OX=9606 GN=IGFBP4 PE=1 SV=2	IGFBP4	Insulin-like growth factor-binding protein 4	0.123	0.506	-0.575	-0.578	4.105	5.263	1	1	1	2	7	7	-2.912	0.183513
P67936	Tropomyosin alpha-4 chain OS=Homo sapiens (Human) OX=9606 GN=TPM4 PE=1 SV=3	TPM4	Tropomyosin alpha-4 chain	2.519	1.417	2.104	2.415	-2.525	-1.075	6	3	6	5	3	4	2.408	0.183875
P19875	C-X-C motif chemokine 2 OS=Homo sapiens (Human) OX=9606 GN=CXCL2 PE=1 SV=1	CXCL2	C-X-C motif chemokine 2	-4.584	-2.284	-3.947	-4.091	1.076	3.974	0	0	0	0	2	2	-3.925	0.185312
Q12805	EGF-containing fibulin-like extracellular matrix protein 1 OS=Homo sapiens (Human) OX=9606 GN=EFEMP1 PE=1 SV=2	EFEMP1	EGF-containing fibulin-like extracellular matrix protein 1	-3.528	-3.386	-2.661	-3.508	-0.673	-0.791	3	3	5	2	10	9	-1.534	0.186702
P13284	Gamma-interferon-inducible lysosomal thiol reductase OS=Homo sapiens (Human) OX=9606 GN=IFI30 PE=1 SV=3	IFI30	Gamma-interferon-inducible lysosomal thiol reductase	1.667	3.496	2.45	3.409	3.049	5.144	1	1	1	1	2	2	-1.33	0.186804
P18206	Vinculin OS=Homo sapiens (Human) OX=9606 GN=VCL PE=1 SV=4	VCL	Vinculin	0.206	-0.224	0.307	0.122	-1.629	-0.739	41	32	39	41	28	33	0.845	0.186809
Q9NWV4	CXXC motif containing zinc binding protein OS=Homo sapiens (Human) OX=9606 GN=CZIB PE=1 SV=1	CZIB	CXXC motif containing zinc binding protein	-1.048	-1.87	-0.922	-1.017	-3.41	-4.326	4	3	4	4	1	1	1.638	0.187142
Q9BUF5	Tubulin beta-6 chain OS=Homo sapiens (Human) OX=9606 GN=TUBB6 PE=1 SV=1	TUBB6	Tubulin beta-6 chain	-3.737	-5.59	-4.016	-3.444	-3.976	-1.747	1	0	0	1	1	2	-1.392	0.191111
P36871	Phosphoglucomutase-1 OS=Homo sapiens (Human) OX=9606 GN=PGM1 PE=1 SV=3	PGM1	Phosphoglucomutase-1	-2.019	-3.219	-3.274	-2.997	-4.968	-3.853	5	4	2	3	0	1	1.102	0.19161
Q96ST8	Centrosomal protein of 89 kDa OS=Homo sapiens (Human) OX=9606 GN=CEP89 PE=1 SV=3	CEP89	Centrosomal protein of 89 kDa	0.973	0.277	-0.223	0.156	-1.334	-0.412	1	1	1	1	1	1	0.872	0.191794
P15291	Beta-1,4-galactosyltransferase 1 OS=Homo sapiens (Human) OX=9606 GN=B4GALT1 PE=1 SV=5	B4GALT1	Beta-1,4-galactosyltransferase 1	-0.002	-0.971	1.448	-0.009	-3.157	-1.768	5	2	5	3	1	2	1.803	0.192216
Q9NQ92	Coordinator of PRMT5 and differentiation stimulator OS=Homo sapiens (Human) OX=9606 GN=COPRS PE=1 SV=3	COPRS	Coordinator of PRMT5 and differentiation stimulator	-2.991	-2.611	-1.629	-2.224	-5.442	-4.404	1	0	0	1	0	0	1.613	0.192841
Q9UGI8	Testin OS=Homo sapiens (Human) OX=9606 GN=TES PE=1 SV=1	TES	Testin	-2.249	-2.812	-2.47	-2.374	-4.658	-3.693	6	3	7	4	1	1	1.065	0.193329
Q13438	Protein OS-9 OS=Homo sapiens (Human) OX=9606 GN=OS9 PE=1 SV=1	OS9	Protein OS-9	-1.878	-1.597	-2.71	-1.676	-5.408	-4.644	2	2	2	1	0	1	1.848	0.194274
O75223	Gamma-glutamylcyclotransferase OS=Homo sapiens (Human) OX=9606 GN=GGCT PE=1 SV=1	GGCT	Gamma-glutamylcyclotransferase	-2.195	0.266	0.384	-1.181	-3.605	-1.912	2	5	4	3	2	3	1.718	0.195208
Q13421	Mesothelin OS=Homo sapiens (Human) OX=9606 GN=MSLN PE=1 SV=2	MSLN	Mesothelin	-1.371	-3.789	-3.537	-4.626	-4.72	-3.421	3	0	0	0	0	0	1.356	0.195524
P06744	Glucose-6-phosphate isomerase OS=Homo sapiens (Human) OX=9606 GN=GPI PE=1 SV=4	GPI	Glucose-6-phosphate isomerase	-1.703	-2.153	-1.814	-2.102	-0.345	-0.6	2	1	2	1	0	2	-0.874	0.196556
P17050	Alpha-N-acetylgalactosaminidase OS=Homo sapiens (Human) OX=9606 GN=NAGA PE=1 SV=2	NAGA	Alpha-N-acetylgalactosaminidase	-0.929	-1.812	-1.559	-2.386	-1.659	-4.744	2	1	2	2	2	0	1.496	0.196799
Q12874	Splicing factor 3A subunit 3 OS=Homo sapiens (Human) OX=9606 GN=SF3A3 PE=1 SV=1	SF3A3	Splicing factor 3A subunit 3	-3.535	-1.19	-1.544	-2.531	-3.531	-4.474	1	0	1	3	0	1	1.422	0.197202
P31949	Protein S100-A11 OS=Homo sapiens (Human) OX=9606 GN=S100A11 PE=1 SV=2	S100A11	Protein S100-A11	-0.859	-0.495	-0.934	-0.93	-2.747	-1.269	3	3	4	3	1	2	0.886	0.19783
Q99961	Endophilin-A2 OS=Homo sapiens (Human) OX=9606 GN=SH3GL1 PE=1 SV=1	SH3GL1	Endophilin-A2	-2.014	-3.141	-2.593	-2.491	-3.903	-4.291	5	1	3	4	1	1	0.979	0.198961
P09493	Tropomyosin alpha-1 chain OS=Homo sapiens (Human) OX=9606 GN=TPM1 PE=1 SV=2	TPM1	Tropomyosin alpha-1 chain	3.1	1.556	2.288	2.576	0.067	-0.805	4	3	4	3	3	2	1.702	0.198997
O00764	Pyridoxal kinase OS=Homo sapiens (Human) OX=9606 GN=PDXK PE=1 SV=1	PDXK	Pyridoxal kinase	-2.754	-1.782	-1.23	-1.6	-4.597	-4.628	1	3	1	2	0	0	1.686	0.199522
P18124	60S ribosomal protein L7 OS=Homo sapiens (Human) OX=9606 GN=RPL7 PE=1 SV=1	RPL7	60S ribosomal protein L7	-1.3	-0.5	-1.554	-1.719	-3.501	-1.403	6	7	5	7	2	5	1.09	0.207843
Q969H8	Myeloid-derived growth factor OS=Homo sapiens (Human) OX=9606 GN=MYDGF PE=1 SV=1	MYDGF	Myeloid-derived growth factor	-0.922	-1.067	-0.843	-0.622	-2.476	-2.811	1	0	1	2	1	1	1.026	0.207931
Q09MP3	RAD51-associated protein 2 OS=Homo sapiens (Human) OX=9606 GN=RAD51AP2 PE=1 SV=1	RAD51AP2	RAD51-associated protein 2	-4.344	-0.007	-4.693	-3.492	2.859	4.405	0	0	0	0	1	1	-4.272	0.207952
Q9UBR2	Cathepsin Z OS=Homo sapiens (Human) OX=9606 GN=CTSZ PE=1 SV=1	CTSZ	Cathepsin Z	-2.11	-2.018	-2.107	-1.734	-2.098	-1.912	4	3	3	4	3	4	-0.164	0.2082
O95841	Angiopoietin-related protein 1 OS=Homo sapiens (Human) OX=9606 GN=ANGPTL1 PE=2 SV=1	ANGPTL1	Angiopoietin-related protein 1	-4.329	-3.5	-3.394	-2.829	-2.205	-3.764	0	1	3	7	4	0	-0.808	0.209465
Q8IWE2	Protein NOXP20 OS=Homo sapiens (Human) OX=9606 GN=FAM114A1 PE=1 SV=2	FAM114A1	Protein NOXP20	-0.66	-3.052	-2.949	-3.022	-3.946	-3.392	5	0	2	2	1	0	1.233	0.209619
O14983	Sarcoplasmic/endoplasmic reticulum calcium ATPase 1 OS=Homo sapiens (Human) OX=9606 GN=ATP2A1 PE=1 SV=1	ATP2A1	Sarcoplasmic/endoplasmic reticulum calcium ATPase 1	-0.075	-2.339	-4.513	-3.781	-4.489	-4.491	14	5	0	0	0	0	1.944	0.209898
Q96P48	Arf-GAP with Rho-GAP domain, ANK repeat and PH domain-containing protein 1 OS=Homo sapiens (Human) OX=9606 GN=ARAP1 PE=1 SV=3	ARAP1	Arf-GAP with Rho-GAP domain, ANK repeat and PH domain-containing protein 1	-3.721	0.44	0.2	-1.411	-4.132	-5.934	0	1	1	1	0	0	2.799	0.211408
Q641Q3	Meteorin-like protein OS=Homo sapiens (Human) OX=9606 GN=METRNL PE=2 SV=1	METRNL	Meteorin-like protein	1.157	0.946	1.407	1.684	-1.178	-1.588	6	4	7	6	6	2	1.531	0.214263
O00584	Ribonuclease T2 OS=Homo sapiens (Human) OX=9606 GN=RNASET2 PE=1 SV=2	RNASET2	Ribonuclease T2	-3.038	-2.792	-2.201	-1.174	-1.172	-2.907	1	1	2	2	2	1	-0.926	0.214935
P41222	Prostaglandin-H2 D-isomerase OS=Homo sapiens (Human) OX=9606 GN=PTGDS PE=1 SV=1	PTGDS	Prostaglandin-H2 D-isomerase	-3.128	-2.838	-4.697	-1.46	-3.676	1.243	0	0	0	1	2	3	-2.257	0.215542
P00338	L-lactate dehydrogenase A chain OS=Homo sapiens (Human) OX=9606 GN=LDHA PE=1 SV=2	LDHA	L-lactate dehydrogenase A chain	1.091	-0.043	0.877	1.18	-4.543	-2.141	8	6	7	6	0	4	2.476	0.217839
P01137	Transforming growth factor beta-1 proprotein OS=Homo sapiens (Human) OX=9606 GN=TGFB1 PE=1 SV=2	TGFB1	Transforming growth factor beta-1 proprotein	-0.098	-1.163	0.042	0.289	-3.988	-3.977	8	6	10	10	1	1	2.152	0.218031
Q96D15	Reticulocalbin-3 OS=Homo sapiens (Human) OX=9606 GN=RCN3 PE=1 SV=1	RCN3	Reticulocalbin-3	0.408	-0.128	0.366	0.412	-2.582	-1.044	8	6	8	9	5	5	1.287	0.21814
P04899	Guanine nucleotide-binding protein G(i) subunit alpha-2 OS=Homo sapiens (Human) OX=9606 GN=GNAI2 PE=1 SV=3	GNAI2	Guanine nucleotide-binding protein G(i) subunit alpha-2	-2.569	-4.246	-3.88	-4.446	-4.648	-3.985	1	2	1	1	0	2	0.794	0.219015
P52209	6-phosphogluconate dehydrogenase, decarboxylating OS=Homo sapiens (Human) OX=9606 GN=PGD PE=1 SV=3	PGD	6-phosphogluconate dehydrogenase, decarboxylating	-2.535	-2.159	-0.967	-1.733	-3.867	-3.69	6	5	7	7	3	4	1.21	0.219337
P13693	Translationally-controlled tumor protein OS=Homo sapiens (Human) OX=9606 GN=TPT1 PE=1 SV=1	TPT1	Translationally-controlled tumor protein	0.843	-0.714	0.867	0.392	-2.679	-1.209	7	4	7	7	3	5	1.497	0.2196
O00339	Matrilin-2 OS=Homo sapiens (Human) OX=9606 GN=MATN2 PE=1 SV=4	MATN2	Matrilin-2	-2.924	-2.65	-0.501	-2.234	-3.809	-4.414	4	6	11	8	1	0	1.461	0.219636
O95967	EGF-containing fibulin-like extracellular matrix protein 2 OS=Homo sapiens (Human) OX=9606 GN=EFEMP2 PE=1 SV=3	EFEMP2	EGF-containing fibulin-like extracellular matrix protein 2	-2.655	-3.149	-3.13	-3.286	-1.044	1.724	3	3	2	3	6	9	-2.109	0.221432
Q9BS40	Latexin OS=Homo sapiens (Human) OX=9606 GN=LXN PE=1 SV=2	LXN	Latexin	-4.145	-2.16	-0.82	-3.044	-3.794	-5.573	0	1	1	0	0	0	1.762	0.22306
P01876	Immunoglobulin heavy constant alpha 1 OS=Homo sapiens (Human) OX=9606 GN=IGHA1 PE=1 SV=2	IGHA1	Immunoglobulin heavy constant alpha 1	-5.029	-1.894	-2.844	-2.46	-1.888	2.713	0	2	2	2	2	3	-2.711	0.223208
Q13126	S-methyl-5'-thioadenosine phosphorylase OS=Homo sapiens (Human) OX=9606 GN=MTAP PE=1 SV=2	MTAP	S-methyl-5'-thioadenosine phosphorylase	-1.002	-1.472	0.014	-0.198	-4.342	-3.907	5	2	4	4	1	2	1.996	0.22338
Q9UN71	Protocadherin gamma-B4 OS=Homo sapiens (Human) OX=9606 GN=PCDHGB4 PE=2 SV=1	PCDHGB4	Protocadherin gamma-B4	-1.732	-3.38	-2.98	-2.89	-3.627	-5.082	1	0	0	0	1	0	1.169	0.223837
P50552	Vasodilator-stimulated phosphoprotein OS=Homo sapiens (Human) OX=9606 GN=VASP PE=1 SV=3	VASP	Vasodilator-stimulated phosphoprotein	-3.45	-4.134	-2.512	-3.702	-4.303	-4.292	2	1	2	1	1	0	0.734	0.224125
O95084	Serine protease 23 OS=Homo sapiens (Human) OX=9606 GN=PRSS23 PE=1 SV=1	PRSS23	Serine protease 23	-2.338	-4.029	-3.199	-2.548	-2.18	-2.65	3	2	2	4	5	2	-0.73	0.224706
P02675	Fibrinogen beta chain OS=Homo sapiens (Human) OX=9606 GN=FGB PE=1 SV=2	FGB	Fibrinogen beta chain	0.236	1.619	0.371	1.184	-2.194	-1.647	3	3	2	3	2	3	1.627	0.225146
O75787	Renin receptor OS=Homo sapiens (Human) OX=9606 GN=ATP6AP2 PE=1 SV=2	ATP6AP2	Renin receptor	0.332	0.39	0.996	0.719	-2.289	-0.547	7	6	8	6	3	6	1.278	0.227406
Q7Z7M9	Polypeptide N-acetylgalactosaminyltransferase 5 OS=Homo sapiens (Human) OX=9606 GN=GALNT5 PE=1 SV=1	GALNT5	Polypeptide N-acetylgalactosaminyltransferase 5	-0.606	-3.796	-3.555	-4.395	-4.418	-3.656	7	0	0	0	0	2	1.504	0.227482
P12955	Xaa-Pro dipeptidase OS=Homo sapiens (Human) OX=9606 GN=PEPD PE=1 SV=3	PEPD	Xaa-Pro dipeptidase	-3.523	-1.977	-1.835	-2.348	-5.027	-3.997	1	1	2	3	0	0	1.346	0.229264
Q9Y383	Putative RNA-binding protein Luc7-like 2 OS=Homo sapiens (Human) OX=9606 GN=LUC7L2 PE=1 SV=2	LUC7L2	Putative RNA-binding protein Luc7-like 2	0.758	-0.094	-0.028	0.628	-3.557	-1.705	2	1	2	2	1	1	1.756	0.229944
P02647	Apolipoprotein A-I OS=Homo sapiens (Human) OX=9606 GN=APOA1 PE=1 SV=1	APOA1	Apolipoprotein A-I	-0.196	2.513	-0.268	-0.305	-1.341	-0.418	1	5	1	1	2	4	1.371	0.23146
A8K2U0	Alpha-2-macroglobulin-like protein 1 OS=Homo sapiens (Human) OX=9606 GN=A2ML1 PE=1 SV=3	A2ML1	Alpha-2-macroglobulin-like protein 1	-3.963	-2.847	-1.873	-3.582	-4.671	-3.451	0	1	5	0	1	2	1.007	0.232972
P11279	Lysosome-associated membrane glycoprotein 1 OS=Homo sapiens (Human) OX=9606 GN=LAMP1 PE=1 SV=3	LAMP1	Lysosome-associated membrane glycoprotein 1	-2.371	-0.227	-0.716	-1.008	0.258	1.931	0	0	1	0	1	1	-1.498	0.234096
Q8NE71	ATP-binding cassette sub-family F member 1 OS=Homo sapiens (Human) OX=9606 GN=ABCF1 PE=1 SV=2	ABCF1	ATP-binding cassette sub-family F member 1	-3.395	-3.146	-2.824	-2.798	-4.67	-4.503	0	1	1	2	0	0	0.869	0.234098
Q9UKK9	ADP-sugar pyrophosphatase OS=Homo sapiens (Human) OX=9606 GN=NUDT5 PE=1 SV=1	NUDT5	ADP-sugar pyrophosphatase	-3.04	-2.431	-2.726	-2.84	-4.988	-3.231	2	1	3	1	0	2	0.954	0.235236
Q9NYF8	Bcl-2-associated transcription factor 1 OS=Homo sapiens (Human) OX=9606 GN=BCLAF1 PE=1 SV=2	BCLAF1	Bcl-2-associated transcription factor 1	-2.052	-2.119	-2.558	-1.854	-4.812	-3.742	3	1	2	3	0	1	1.226	0.235553
P54578	Ubiquitin carboxyl-terminal hydrolase 14 OS=Homo sapiens (Human) OX=9606 GN=USP14 PE=1 SV=3	USP14	Ubiquitin carboxyl-terminal hydrolase 14	-3.554	-4.056	-4.292	-3.313	-3.788	-3.704	2	1	2	2	0	2	-0.366	0.235675
Q32P28	Prolyl 3-hydroxylase 1 OS=Homo sapiens (Human) OX=9606 GN=P3H1 PE=1 SV=2	P3H1	Prolyl 3-hydroxylase 1	-1.341	-2.189	-0.847	-1.241	-3.023	-3.192	8	6	10	9	5	4	1.026	0.236081
Q13822	Ectonucleotide pyrophosphatase/phosphodiesterase family member 2 OS=Homo sapiens (Human) OX=9606 GN=ENPP2 PE=1 SV=3	ENPP2	Ectonucleotide pyrophosphatase/phosphodiesterase family member 2	0.097	-1.966	-1.932	-1.65	-2.255	-3.829	7	3	3	2	3	2	1.311	0.236214
P49588	Alanine--tRNA ligase, cytoplasmic OS=Homo sapiens (Human) OX=9606 GN=AARS1 PE=1 SV=2	AARS1	Alanine--tRNA ligase, cytoplasmic	-2.231	-3.227	-2.802	-2.205	-5.002	-5.445	4	2	3	6	0	0	1.464	0.237294
P27487	Dipeptidyl peptidase 4 OS=Homo sapiens (Human) OX=9606 GN=DPP4 PE=1 SV=2	DPP4	Dipeptidyl peptidase 4	-3.181	-4.681	-3.148	-2.062	-2.845	-3.43	0	0	0	2	0	1	-0.891	0.237502
Q06033	Inter-alpha-trypsin inhibitor heavy chain H3 OS=Homo sapiens (Human) OX=9606 GN=ITIH3 PE=1 SV=2	ITIH3	Inter-alpha-trypsin inhibitor heavy chain H3	2.019	3.1	3.213	1.815	-0.88	2.68	5	5	6	3	3	4	1.572	0.239028
P27658	Collagen alpha-1(VIII) chain OS=Homo sapiens (Human) OX=9606 GN=COL8A1 PE=1 SV=2	COL8A1	Collagen alpha-1(VIII) chain	1.237	-3.522	-1.588	-2.546	-3.606	-3.641	11	1	4	6	1	2	1.973	0.239173
P47914	60S ribosomal protein L29 OS=Homo sapiens (Human) OX=9606 GN=RPL29 PE=1 SV=2	RPL29	60S ribosomal protein L29	1.364	0.244	0.799	1.313	-1.339	-3.658	2	2	2	2	1	0	2.03	0.239959
Q9GZZ8	Extracellular glycoprotein lacritin OS=Homo sapiens (Human) OX=9606 GN=LACRT PE=1 SV=1	LACRT	Extracellular glycoprotein lacritin	-3.048	-4.819	-3.785	-3.733	-2.608	1.142	0	0	0	0	0	2	-2.151	0.240149
Q04760	Lactoylglutathione lyase OS=Homo sapiens (Human) OX=9606 GN=GLO1 PE=1 SV=4	GLO1	Lactoylglutathione lyase	-0.787	-0.48	-0.003	-0.142	-3.502	-1.728	2	3	3	4	2	3	1.367	0.242171
Q99650	Oncostatin-M-specific receptor subunit beta OS=Homo sapiens (Human) OX=9606 GN=OSMR PE=1 SV=1	OSMR	Oncostatin-M-specific receptor subunit beta	-1.815	-2.147	-1.208	-0.961	-4.463	-5.522	1	0	1	1	0	0	1.926	0.24249
Q15746	Myosin light chain kinase, smooth muscle OS=Homo sapiens (Human) OX=9606 GN=MYLK PE=1 SV=4	MYLK	Myosin light chain kinase, smooth muscle	-3.926	0.433	-0.042	-1.879	-4.575	-3.613	1	2	2	2	0	1	2.178	0.242694
Q02878	60S ribosomal protein L6 OS=Homo sapiens (Human) OX=9606 GN=RPL6 PE=1 SV=3	RPL6	60S ribosomal protein L6	-1.779	-1.213	-1.788	-1.67	-3.665	-2.068	6	5	8	5	1	7	0.874	0.242845
P07942	Laminin subunit beta-1 OS=Homo sapiens (Human) OX=9606 GN=LAMB1 PE=1 SV=2	LAMB1	Laminin subunit beta-1	-2.017	-2.278	-2.052	-1.866	-3.829	-2.998	9	7	11	12	5	6	0.782	0.245266
P24534	Elongation factor 1-beta OS=Homo sapiens (Human) OX=9606 GN=EEF1B2 PE=1 SV=3	EEF1B2	Elongation factor 1-beta	-0.067	-0.94	-0.009	0.252	-2.588	-3.129	6	2	6	6	3	3	1.483	0.245678
Q9H4M9	EH domain-containing protein 1 OS=Homo sapiens (Human) OX=9606 GN=EHD1 PE=1 SV=2	EHD1	EH domain-containing protein 1	-2.902	-2.64	-1.27	-2.221	-3.518	-4.26	6	2	8	9	1	2	1.062	0.245712
Q7KZF4	Staphylococcal nuclease domain-containing protein 1 OS=Homo sapiens (Human) OX=9606 GN=SND1 PE=1 SV=1	SND1	Staphylococcal nuclease domain-containing protein 1	-2.055	-4.307	-3.983	-2.266	-2.717	-2.456	3	0	1	5	0	5	-0.968	0.247126
O15400	Syntaxin-7 OS=Homo sapiens (Human) OX=9606 GN=STX7 PE=1 SV=4	STX7	Syntaxin-7	-2.307	-3.368	-0.541	-2.198	-4.889	-3.722	4	1	3	1	2	0	1.531	0.248478
Q92896	Golgi apparatus protein 1 OS=Homo sapiens (Human) OX=9606 GN=GLG1 PE=1 SV=2	GLG1	Golgi apparatus protein 1	-2.582	-3.103	-2.979	-2.642	-2.793	-1.643	9	9	7	11	13	19	-0.529	0.25048
P06733	Alpha-enolase OS=Homo sapiens (Human) OX=9606 GN=ENO1 PE=1 SV=2	ENO1	Alpha-enolase	2.835	1.66	2.232	2.512	0.232	0.96	14	11	13	12	10	9	1.008	0.25179
P54709	Sodium/potassium-transporting ATPase subunit beta-3 OS=Homo sapiens (Human) OX=9606 GN=ATP1B3 PE=1 SV=1	ATP1B3	Sodium/potassium-transporting ATPase subunit beta-3	0.699	-0.351	0.336	0.452	-4.67	-1.261	1	0	1	1	0	0	2.054	0.252164
Q8WWI1	LIM domain only protein 7 OS=Homo sapiens (Human) OX=9606 GN=LMO7 PE=1 SV=3	LMO7	LIM domain only protein 7	-2.563	-3.867	-4.392	-4.093	-4.326	-4.672	6	1	1	2	0	1	0.756	0.254651
P05067	Amyloid-beta precursor protein OS=Homo sapiens (Human) OX=9606 GN=APP PE=1 SV=3	APP	Amyloid-beta precursor protein	-0.282	-1.107	-0.71	-0.215	-0.691	0.875	11	9	12	13	13	14	-0.689	0.256427
P34096	Ribonuclease 4 OS=Homo sapiens (Human) OX=9606 GN=RNASE4 PE=1 SV=3	RNASE4	Ribonuclease 4	-3.882	-4.417	-3.32	-4.661	-1.331	0.812	0	0	1	0	3	3	-2.146	0.25675
Q16666	Gamma-interferon-inducible protein 16 OS=Homo sapiens (Human) OX=9606 GN=IFI16 PE=1 SV=3	IFI16	Gamma-interferon-inducible protein 16	-4.498	-1.244	-2.995	-3.085	-5.352	-4.94	0	0	0	3	0	0	1.547	0.256956
Q15828	Cystatin-M OS=Homo sapiens (Human) OX=9606 GN=CST6 PE=1 SV=1	CST6	Cystatin-M	1.786	0.15	-0.936	-1.269	-4.361	0.334	1	2	1	0	1	2	2.099	0.257082
Q96P63	Serpin B12 OS=Homo sapiens (Human) OX=9606 GN=SERPINB12 PE=1 SV=1	SERPINB12	Serpin B12	-2.149	-0.23	1.093	-1.577	-2.59	-1.191	1	4	5	4	3	3	1.357	0.2578
O95497	Pantetheinase OS=Homo sapiens (Human) OX=9606 GN=VNN1 PE=1 SV=2	VNN1	Pantetheinase	-4.826	-3.52	-2.526	-5.279	1.719	4.065	0	0	0	0	1	1	-3.792	0.258938
Q9UN70	Protocadherin gamma-C3 OS=Homo sapiens (Human) OX=9606 GN=PCDHGC3 PE=1 SV=1	PCDHGC3	Protocadherin gamma-C3	-2.687	-2.591	-3.619	-1.647	-3.22	-1.528	3	2	2	4	0	3	-0.834	0.259824
O95336	6-phosphogluconolactonase OS=Homo sapiens (Human) OX=9606 GN=PGLS PE=1 SV=2	PGLS	6-phosphogluconolactonase	-2.821	-2.836	-1.821	-2.406	-5.162	-3.352	1	2	0	2	0	0	1.147	0.260182
Q9NS15	Latent-transforming growth factor beta-binding protein 3 OS=Homo sapiens (Human) OX=9606 GN=LTBP3 PE=1 SV=4	LTBP3	Latent-transforming growth factor beta-binding protein 3	-4.01	-4.066	-3.953	-3.613	-4.104	-2.742	2	0	1	2	1	4	-0.523	0.261008
P07237	Protein disulfide-isomerase OS=Homo sapiens (Human) OX=9606 GN=P4HB PE=1 SV=3	P4HB	Protein disulfide-isomerase	-1.308	-2.086	-0.829	-1.2	-2.667	-2.813	12	8	14	14	11	8	0.819	0.264566
Q13591	Semaphorin-5A OS=Homo sapiens (Human) OX=9606 GN=SEMA5A PE=1 SV=3	SEMA5A	Semaphorin-5A	-1.701	-1.804	0.004	-0.459	-4.365	-4.057	2	2	2	3	0	1	1.794	0.264721
O00115	Deoxyribonuclease-2-alpha OS=Homo sapiens (Human) OX=9606 GN=DNASE2 PE=1 SV=2	DNASE2	Deoxyribonuclease-2-alpha	1.542	2.087	2.355	2.673	-0.118	-0.809	2	2	3	3	3	1	1.412	0.265111
O14745	Na(+)/H(+) exchange regulatory cofactor NHE-RF1 OS=Homo sapiens (Human) OX=9606 GN=SLC9A3R1 PE=1 SV=4	SLC9A3R1	Na(+)/H(+) exchange regulatory cofactor NHE-RF1	-3.381	-4.179	-3.122	-3.742	-2.386	-2.44	2	1	2	3	4	3	-0.705	0.266039
Q93063	Exostosin-2 OS=Homo sapiens (Human) OX=9606 GN=EXT2 PE=1 SV=1	EXT2	Exostosin-2	-2.499	-1.58	-1.522	-1.358	-3.506	-4.781	1	1	2	4	0	0	1.348	0.26754
P05452	Tetranectin OS=Homo sapiens (Human) OX=9606 GN=CLEC3B PE=1 SV=3	CLEC3B	Tetranectin	0.27	0.383	-0.604	-0.813	2.633	3.24	4	3	3	2	5	6	-1.67	0.26812
Q9Y287	Integral membrane protein 2B OS=Homo sapiens (Human) OX=9606 GN=ITM2B PE=1 SV=1	ITM2B	Integral membrane protein 2B	-3.779	-1.789	-0.099	-3.502	-3.442	-2.891	0	1	2	0	1	1	1.389	0.268139
Q92817	Envoplakin OS=Homo sapiens (Human) OX=9606 GN=EVPL PE=1 SV=3	EVPL	Envoplakin	-1.446	-0.751	-2.126	-1.575	-1.979	-3.581	1	1	0	1	0	0	0.937	0.268348
P14625	Endoplasmin OS=Homo sapiens (Human) OX=9606 GN=HSP90B1 PE=1 SV=1	HSP90B1	Endoplasmin	-1.4	-2.605	-2.135	-1.756	-4.106	-3.232	11	10	9	13	5	9	0.985	0.270382
P15531	Nucleoside diphosphate kinase A OS=Homo sapiens (Human) OX=9606 GN=NME1 PE=1 SV=1	NME1	Nucleoside diphosphate kinase A	-0.935	-0.855	-1.243	-0.876	-2.679	-1.544	2	2	3	4	1	3	0.689	0.270782
P36952	Serpin B5 OS=Homo sapiens (Human) OX=9606 GN=SERPINB5 PE=1 SV=2	SERPINB5	Serpin B5	-4.486	-3.955	-4.838	-1.01	-4.454	-3.716	0	0	0	8	0	0	-1.366	0.273792
Q9UDY2	Tight junction protein ZO-2 OS=Homo sapiens (Human) OX=9606 GN=TJP2 PE=1 SV=2	TJP2	Tight junction protein ZO-2	-1.979	-3.151	-3.21	-2.401	-4.46	-4.529	2	1	3	3	0	0	1.016	0.27537
P00491	Purine nucleoside phosphorylase OS=Homo sapiens (Human) OX=9606 GN=PNP PE=1 SV=2	PNP	Purine nucleoside phosphorylase	-4.332	-4.133	-3.633	-2.69	-4.109	-3.557	1	0	2	2	0	1	-0.581	0.277488
O95297	Myelin protein zero-like protein 1 OS=Homo sapiens (Human) OX=9606 GN=MPZL1 PE=1 SV=1	MPZL1	Myelin protein zero-like protein 1	-0.351	-2.634	-3.264	0.582	-2.325	0.33	2	1	1	2	1	1	-1.612	0.277653
Q96EQ0	Small glutamine-rich tetratricopeptide repeat-containing protein beta OS=Homo sapiens (Human) OX=9606 GN=SGTB PE=1 SV=1	SGTB	Small glutamine-rich tetratricopeptide repeat-containing protein beta	-1.398	-2.499	-1.297	-1.263	-3.402	-3.914	1	1	0	2	0	0	1.128	0.277716
P23526	Adenosylhomocysteinase OS=Homo sapiens (Human) OX=9606 GN=AHCY PE=1 SV=4	AHCY	Adenosylhomocysteinase	-1.718	-2.025	-0.615	-1.037	-3.401	-3.182	6	8	11	8	6	6	1.087	0.278283
Q6ZVX7	F-box only protein 50 OS=Homo sapiens (Human) OX=9606 GN=NCCRP1 PE=1 SV=1	NCCRP1	F-box only protein 50	-3.504	-3.549	-2.249	-2.957	-4.455	-4.275	1	2	2	3	1	1	0.795	0.279322
Q02818	Nucleobindin-1 OS=Homo sapiens (Human) OX=9606 GN=NUCB1 PE=1 SV=4	NUCB1	Nucleobindin-1	4.355	3.409	4.588	4.462	2.601	2.609	23	24	29	25	20	20	0.893	0.280512
P11055	Myosin-3 OS=Homo sapiens (Human) OX=9606 GN=MYH3 PE=1 SV=3	MYH3	Myosin-3	1.506	-3.703	-4.583	-4.841	-4.472	-4.584	4	0	0	0	0	0	2.372	0.280626
P55036	26S proteasome non-ATPase regulatory subunit 4 OS=Homo sapiens (Human) OX=9606 GN=PSMD4 PE=1 SV=1	PSMD4	26S proteasome non-ATPase regulatory subunit 4	-3.868	-3.466	-2.502	-3.046	-4.642	-4.642	1	1	2	3	0	1	0.832	0.281525
Q00888	Pregnancy-specific beta-1-glycoprotein 4 OS=Homo sapiens (Human) OX=9606 GN=PSG4 PE=2 SV=3	PSG4	Pregnancy-specific beta-1-glycoprotein 4	-3.56	-4.184	-4.271	-3.802	-3.416	0.961	0	0	0	0	0	5	-1.92	0.281631
Q9H4F8	SPARC-related modular calcium-binding protein 1 OS=Homo sapiens (Human) OX=9606 GN=SMOC1 PE=1 SV=1	SMOC1	SPARC-related modular calcium-binding protein 1	-1.386	-4.421	-3.52	-4.629	-3.935	-4.2	3	0	0	0	0	0	1.146	0.28201
P60174	Triosephosphate isomerase OS=Homo sapiens (Human) OX=9606 GN=TPI1 PE=1 SV=3	TPI1	Triosephosphate isomerase	0.596	-0.84	-0.188	0.288	-2.236	-1.739	13	8	11	10	8	8	1.085	0.283508
Q9UKZ9	Procollagen C-endopeptidase enhancer 2 OS=Homo sapiens (Human) OX=9606 GN=PCOLCE2 PE=1 SV=1	PCOLCE2	Procollagen C-endopeptidase enhancer 2	-0.598	-4.083	-3.86	-4.506	-3.771	-4.543	5	1	0	1	2	0	1.427	0.283974
P26022	Pentraxin-related protein PTX3 OS=Homo sapiens (Human) OX=9606 GN=PTX3 PE=1 SV=3	PTX3	Pentraxin-related protein PTX3	-0.104	-0.683	0.769	0.785	-2.292	-3.457	9	8	10	10	7	5	1.649	0.283996
P55290	Cadherin-13 OS=Homo sapiens (Human) OX=9606 GN=CDH13 PE=1 SV=1	CDH13	Cadherin-13	2.243	0.822	1.461	1.895	-0.031	-0.351	7	4	7	7	5	6	1.004	0.284204
P01023	Alpha-2-macroglobulin OS=Homo sapiens (Human) OX=9606 GN=A2M PE=1 SV=3	A2M	Alpha-2-macroglobulin	4.004	4.175	3.536	4.224	2.379	2.998	4	4	5	4	4	5	0.705	0.287566
Q9H173	Nucleotide exchange factor SIL1 OS=Homo sapiens (Human) OX=9606 GN=SIL1 PE=1 SV=1	SIL1	Nucleotide exchange factor SIL1	-3.149	-3.733	-4.847	-3.437	-3.673	-1.504	0	1	0	1	1	3	-1.038	0.288279
P32004	Neural cell adhesion molecule L1 OS=Homo sapiens (Human) OX=9606 GN=L1CAM PE=1 SV=2	L1CAM	Neural cell adhesion molecule L1	-4.683	-5.46	-4.305	-3.9	-4.941	-0.273	0	0	0	0	0	2	-1.778	0.288864
P11021	Endoplasmic reticulum chaperone BiP OS=Homo sapiens (Human) OX=9606 GN=HSPA5 PE=1 SV=2	HSPA5	Endoplasmic reticulum chaperone BiP	-0.553	-1.538	-0.871	-0.989	-2.379	-1.431	22	11	20	15	15	16	0.613	0.289511
O75874	Isocitrate dehydrogenase [NADP] cytoplasmic OS=Homo sapiens (Human) OX=9606 GN=IDH1 PE=1 SV=2	IDH1	Isocitrate dehydrogenase [NADP] cytoplasmic	-1.759	-1.56	-1.302	-0.855	-3.728	-3.388	6	6	8	9	4	4	1.116	0.289998
P50454	Serpin H1 OS=Homo sapiens (Human) OX=9606 GN=SERPINH1 PE=1 SV=2	SERPINH1	Serpin H1	-0.255	-1.594	-0.588	-0.61	-2.235	-1.936	11	4	6	9	7	8	0.781	0.29001
P30101	Protein disulfide-isomerase A3 OS=Homo sapiens (Human) OX=9606 GN=PDIA3 PE=1 SV=4	PDIA3	Protein disulfide-isomerase A3	-0.182	-0.416	-0.424	-0.258	-2.979	-0.817	15	15	14	14	11	11	1.011	0.291855
O00468	Agrin OS=Homo sapiens (Human) OX=9606 GN=AGRN PE=1 SV=6	AGRN	Agrin	-3.472	-3.721	-3.796	-3.562	-3.566	-2.364	5	1	4	7	9	13	-0.499	0.29217
Q9H0B8	Cysteine-rich secretory protein LCCL domain-containing 2 OS=Homo sapiens (Human) OX=9606 GN=CRISPLD2 PE=2 SV=1	CRISPLD2	Cysteine-rich secretory protein LCCL domain-containing 2	-4.59	-4.752	-4.509	-4.58	-4.367	-2.521	0	0	1	0	1	2	-0.794	0.293609
P20591	Interferon-induced GTP-binding protein Mx1 OS=Homo sapiens (Human) OX=9606 GN=MX1 PE=1 SV=4	MX1	Interferon-induced GTP-binding protein Mx1	-4.649	-3.82	-4	-1.244	-3.779	-4.075	0	0	2	5	0	1	-1.124	0.294932
P0DMV9	Heat shock 70 kDa protein 1B OS=Homo sapiens (Human) OX=9606 GN=HSPA1B PE=1 SV=1	HSPA1B	Heat shock 70 kDa protein 1B	-0.85	-1.081	0.047	-0.229	-2.475	-1.91	16	13	18	15	11	12	0.91	0.295687
Q9BWD1	Acetyl-CoA acetyltransferase, cytosolic OS=Homo sapiens (Human) OX=9606 GN=ACAT2 PE=1 SV=2	ACAT2	Acetyl-CoA acetyltransferase, cytosolic	-0.24	0.913	0.52	0.989	-3.407	-1.102	3	2	2	2	1	2	1.571	0.297858
P15289	Arylsulfatase A OS=Homo sapiens (Human) OX=9606 GN=ARSA PE=1 SV=3	ARSA	Arylsulfatase A	-3.536	-1.952	-1.18	-2.177	-3.867	-3.778	1	2	5	2	1	1	1.051	0.300446
P17900	Ganglioside GM2 activator OS=Homo sapiens (Human) OX=9606 GN=GM2A PE=1 SV=4	GM2A	Ganglioside GM2 activator	-1.037	-0.441	-1.128	-0.576	-0.691	2.728	2	3	3	2	3	4	-1.356	0.300585
P07355	Annexin A2 OS=Homo sapiens (Human) OX=9606 GN=ANXA2 PE=1 SV=2	ANXA2	Annexin A2	0.54	0.361	0.764	0.32	-0.923	0.571	15	14	13	15	10	14	0.566	0.300851
O75503	Ceroid-lipofuscinosis neuronal protein 5 OS=Homo sapiens (Human) OX=9606 GN=CLN5 PE=1 SV=2	CLN5	Ceroid-lipofuscinosis neuronal protein 5	-2.605	-2.25	-1.369	-1.336	-4.78	-4.065	1	0	2	2	0	0	1.319	0.300975
O76061	Stanniocalcin-2 OS=Homo sapiens (Human) OX=9606 GN=STC2 PE=1 SV=1	STC2	Stanniocalcin-2	1.539	0.959	2.265	1.582	2.133	3.271	4	4	4	5	6	4	-0.741	0.301213
P04732	Metallothionein-1E OS=Homo sapiens (Human) OX=9606 GN=MT1E PE=1 SV=1	MT1E	Metallothionein-1E	-3.219	-2.709	-3.466	-3.731	-1.505	3.9	1	1	0	0	1	2	-2.686	0.30349
P49747	Cartilage oligomeric matrix protein OS=Homo sapiens (Human) OX=9606 GN=COMP PE=1 SV=2	COMP	Cartilage oligomeric matrix protein	-3.958	-3.072	-2.697	-3.928	-1.495	-0.324	2	2	3	2	5	5	-1.327	0.303719
P30530	Tyrosine-protein kinase receptor UFO OS=Homo sapiens (Human) OX=9606 GN=AXL PE=1 SV=4	AXL	Tyrosine-protein kinase receptor UFO	-2.733	-3.766	-3.045	-3.301	-3.488	-4.221	3	2	3	3	2	2	0.488	0.304524
Q13867	Bleomycin hydrolase OS=Homo sapiens (Human) OX=9606 GN=BLMH PE=1 SV=1	BLMH	Bleomycin hydrolase	-4.093	-2.185	-0.455	-4.28	-3.419	-2.977	1	3	5	1	1	0	1.314	0.304977
P23560	Brain-derived neurotrophic factor OS=Homo sapiens (Human) OX=9606 GN=BDNF PE=1 SV=1	BDNF	Brain-derived neurotrophic factor	-1.253	-2.031	-1.278	-1.321	-2.206	-4.563	7	5	5	7	5	0	1.176	0.304988
O43854	EGF-like repeat and discoidin I-like domain-containing protein 3 OS=Homo sapiens (Human) OX=9606 GN=EDIL3 PE=1 SV=1	EDIL3	EGF-like repeat and discoidin I-like domain-containing protein 3	-0.448	-1.632	-1.638	-1.553	-2.714	-1.443	12	8	8	9	8	10	0.664	0.306584
P13796	Plastin-2 OS=Homo sapiens (Human) OX=9606 GN=LCP1 PE=1 SV=6	LCP1	Plastin-2	-2.197	-2.984	-3.135	-2.654	-3.433	-3.782	4	3	3	5	3	5	0.518	0.307121
Q9UM47	Neurogenic locus notch homolog protein 3 OS=Homo sapiens (Human) OX=9606 GN=NOTCH3 PE=1 SV=2	NOTCH3	Neurogenic locus notch homolog protein 3	-4.214	-4.653	-3.794	-4.218	-3.873	-1.983	0	1	1	0	1	7	-0.863	0.307204
P14550	Aldo-keto reductase family 1 member A1 OS=Homo sapiens (Human) OX=9606 GN=AKR1A1 PE=1 SV=3	AKR1A1	Aldo-keto reductase family 1 member A1	-1.211	-1.794	-1.506	-1.374	-3.272	-1.924	7	4	6	6	3	3	0.686	0.308308
O95445	Apolipoprotein M OS=Homo sapiens (Human) OX=9606 GN=APOM PE=1 SV=2	APOM	Apolipoprotein M	0.586	1.766	1.491	0.959	2.235	3.527	2	2	2	2	3	3	-0.959	0.308619
P26599	Polypyrimidine tract-binding protein 1 OS=Homo sapiens (Human) OX=9606 GN=PTBP1 PE=1 SV=1	PTBP1	Polypyrimidine tract-binding protein 1	-2.472	-3.315	-2.23	-2.447	-3.91	-3.588	3	0	4	4	2	3	0.643	0.309133
P29508	Serpin B3 OS=Homo sapiens (Human) OX=9606 GN=SERPINB3 PE=1 SV=2	SERPINB3	Serpin B3	-2.935	-0.725	-1.281	-1.184	-5.14	-3.183	1	3	3	4	0	1	1.522	0.313341
Q6NW40	RGM domain family member B OS=Homo sapiens (Human) OX=9606 GN=RGMB PE=1 SV=3	RGMB	RGM domain family member B	-1.959	-0.225	-0.566	-0.221	-4.478	-2.69	1	2	3	3	1	2	1.547	0.313708
Q04837	Single-stranded DNA-binding protein, mitochondrial OS=Homo sapiens (Human) OX=9606 GN=SSBP1 PE=1 SV=1	SSBP1	Single-stranded DNA-binding protein, mitochondrial	-3.231	-4.154	-4.612	-2.844	-4.453	-0.407	0	0	0	1	0	2	-1.431	0.314187
P42771	Cyclin-dependent kinase inhibitor 2A OS=Homo sapiens (Human) OX=9606 GN=CDKN2A PE=1 SV=2	CDKN2A	Cyclin-dependent kinase inhibitor 2A	-1.6	-4.658	-1.855	-4.294	-5.695	-2.654	1	0	1	0	0	0	1.51	0.31505
P20618	Proteasome subunit beta type-1 OS=Homo sapiens (Human) OX=9606 GN=PSMB1 PE=1 SV=2	PSMB1	Proteasome subunit beta type-1	-2.67	-2.606	-1.183	-2.204	-3.768	-2.781	5	4	6	6	4	3	0.765	0.315163
Q96KP4	Cytosolic non-specific dipeptidase OS=Homo sapiens (Human) OX=9606 GN=CNDP2 PE=1 SV=2	CNDP2	Cytosolic non-specific dipeptidase	-2.709	-3.644	-0.472	-3.207	-2.992	-4.045	2	2	4	2	2	2	1.14	0.315632
Q16543	Hsp90 co-chaperone Cdc37 OS=Homo sapiens (Human) OX=9606 GN=CDC37 PE=1 SV=1	CDC37	Hsp90 co-chaperone Cdc37	0.048	-0.325	0.445	1.035	-2.931	-2.166	4	4	6	6	2	4	1.41	0.317196
P14314	Glucosidase 2 subunit beta OS=Homo sapiens (Human) OX=9606 GN=PRKCSH PE=1 SV=2	PRKCSH	Glucosidase 2 subunit beta	-1.747	-1.665	-2.1	-1.265	-3.462	-3.202	4	2	2	7	3	2	0.805	0.317573
Q86SX6	Glutaredoxin-related protein 5, mitochondrial OS=Homo sapiens (Human) OX=9606 GN=GLRX5 PE=1 SV=2	GLRX5	Glutaredoxin-related protein 5, mitochondrial	-2.482	-5.502	-4.146	-1.25	2.104	-5.189	1	0	0	1	0	0	-2.598	0.318299
P52907	F-actin-capping protein subunit alpha-1 OS=Homo sapiens (Human) OX=9606 GN=CAPZA1 PE=1 SV=3	CAPZA1	F-actin-capping protein subunit alpha-1	-3.556	-3.244	-0.982	-2.137	-4.914	-4.951	1	1	3	2	1	0	1.406	0.318549
Q15056	Eukaryotic translation initiation factor 4H OS=Homo sapiens (Human) OX=9606 GN=EIF4H PE=1 SV=5	EIF4H	Eukaryotic translation initiation factor 4H	-3.643	-4.151	-3.677	-3.404	-3.602	-3.79	1	1	1	2	1	1	-0.225	0.319381
Q13283	Ras GTPase-activating protein-binding protein 1 OS=Homo sapiens (Human) OX=9606 GN=G3BP1 PE=1 SV=1	G3BP1	Ras GTPase-activating protein-binding protein 1	-1.938	-3.659	-1.344	-1.598	-4.744	-5.021	5	2	5	5	1	0	1.475	0.319657
Q9UKX2	Myosin-2 OS=Homo sapiens (Human) OX=9606 GN=MYH2 PE=1 SV=1	MYH2	Myosin-2	0.494	-4.968	-3.474	-4.701	-3.835	-5.093	2	0	0	0	0	0	1.894	0.320655
Q8N5F7	NF-kappa-B-activating protein OS=Homo sapiens (Human) OX=9606 GN=NKAP PE=1 SV=1	NKAP	NF-kappa-B-activating protein	-5.089	-3.163	-4.43	-2.958	-4.362	-2.822	0	1	0	0	0	1	-0.847	0.321624
Q15904	V-type proton ATPase subunit S1 OS=Homo sapiens (Human) OX=9606 GN=ATP6AP1 PE=1 SV=2	ATP6AP1	V-type proton ATPase subunit S1	-1.988	-2.94	-0.799	-2.16	-4.869	-2.333	3	2	4	3	1	2	1.212	0.321782
P35625	Metalloproteinase inhibitor 3 OS=Homo sapiens (Human) OX=9606 GN=TIMP3 PE=1 SV=2	TIMP3	Metalloproteinase inhibitor 3	-0.19	-1.838	2.134	0.778	-4.149	-2.863	2	1	3	3	2	0	2.113	0.322112
B5ME19	Eukaryotic translation initiation factor 3 subunit C-like protein OS=Homo sapiens (Human) OX=9606 GN=EIF3CL PE=1 SV=1	EIF3CL	Eukaryotic translation initiation factor 3 subunit C-like protein	-4.197	-4.621	-4.264	-3.593	-3.409	-4.674	3	0	0	4	2	0	-0.469	0.322587
Q8NBZ7	UDP-glucuronic acid decarboxylase 1 OS=Homo sapiens (Human) OX=9606 GN=UXS1 PE=1 SV=1	UXS1	UDP-glucuronic acid decarboxylase 1	-1.133	-2.619	-1.483	-1.485	-3.376	-2.792	9	3	7	8	5	4	0.806	0.323784
P07225	Vitamin K-dependent protein S OS=Homo sapiens (Human) OX=9606 GN=PROS1 PE=1 SV=1	PROS1	Vitamin K-dependent protein S	-2.023	-1.518	-2.337	-3.132	-2.478	-1.795	1	2	2	1	1	3	0.509	0.325227
P19022	Cadherin-2 OS=Homo sapiens (Human) OX=9606 GN=CDH2 PE=1 SV=4	CDH2	Cadherin-2	-0.397	-1.111	-0.016	-0.182	-1.322	-2.611	16	12	17	15	15	7	0.864	0.325662
P16401	Histone H1.5 OS=Homo sapiens (Human) OX=9606 GN=H1-5 PE=1 SV=3	H1-5	Histone H1.5	3.19	2.242	1.693	3.031	-0.783	0.895	3	3	3	4	2	3	1.327	0.326197
P14621	Acylphosphatase-2 OS=Homo sapiens (Human) OX=9606 GN=ACYP2 PE=1 SV=2	ACYP2	Acylphosphatase-2	-3.991	-2.69	-2.57	-2.604	-4.677	-4.781	0	0	1	2	0	0	0.937	0.328332
P07737	Profilin-1 OS=Homo sapiens (Human) OX=9606 GN=PFN1 PE=1 SV=2	PFN1	Profilin-1	4.068	3.679	4.074	4.859	1.174	2.073	9	9	8	10	5	8	1.238	0.329885
Q9Y490	Talin-1 OS=Homo sapiens (Human) OX=9606 GN=TLN1 PE=1 SV=3	TLN1	Talin-1	-1.397	-2.046	-1.511	-1.139	-3.591	-2.696	51	35	55	57	25	36	0.824	0.330126
O60330	Protocadherin gamma-A12 OS=Homo sapiens (Human) OX=9606 GN=PCDHGA12 PE=2 SV=1	PCDHGA12	Protocadherin gamma-A12	-1.653	-3.457	-3.004	-2.258	-4.951	-4.101	3	0	2	5	0	0	1.065	0.330292
P07196	Neurofilament light polypeptide OS=Homo sapiens (Human) OX=9606 GN=NEFL PE=1 SV=3	NEFL	Neurofilament light polypeptide	-4.431	-4.442	-4.677	-4.983	-3.694	-1.923	0	0	0	0	0	6	-0.983	0.33145
Q9UBS3	DnaJ homolog subfamily B member 9 OS=Homo sapiens (Human) OX=9606 GN=DNAJB9 PE=1 SV=1	DNAJB9	DnaJ homolog subfamily B member 9	-1.356	-1.162	-0.76	-1.409	-2.703	-0.976	5	5	8	9	4	9	0.603	0.332555
P35556	Fibrillin-2 OS=Homo sapiens (Human) OX=9606 GN=FBN2 PE=1 SV=3	FBN2	Fibrillin-2	-4.07	-3.697	-3.58	-3.982	-0.945	-3.333	4	5	6	6	29	13	-1.029	0.332936
P12259	Coagulation factor V OS=Homo sapiens (Human) OX=9606 GN=F5 PE=1 SV=4	F5	Coagulation factor V	0.588	-0.164	-0.652	0.657	-2.882	-1.623	6	5	5	6	3	3	1.206	0.333137
P10451	Osteopontin OS=Homo sapiens (Human) OX=9606 GN=SPP1 PE=1 SV=1	SPP1	Osteopontin	-2.015	-2.594	-3.149	-3.354	-1.192	1.467	2	1	1	2	5	5	-1.56	0.337268
Q96DR5	BPI fold-containing family A member 2 OS=Homo sapiens (Human) OX=9606 GN=BPIFA2 PE=1 SV=2	BPIFA2	BPI fold-containing family A member 2	-4.077	-4.142	-4.11	-4.141	-3.864	-0.455	0	0	0	0	0	5	-1.29	0.337606
P40121	Macrophage-capping protein OS=Homo sapiens (Human) OX=9606 GN=CAPG PE=1 SV=2	CAPG	Macrophage-capping protein	-1.064	-2.763	-2.866	-2.196	-4.57	-2.912	5	4	1	4	1	0	0.995	0.337707
P05408	Neuroendocrine protein 7B2 OS=Homo sapiens (Human) OX=9606 GN=SCG5 PE=1 SV=2	SCG5	Neuroendocrine protein 7B2	-3.453	-2.829	-2.944	-3.447	-2.393	-0.776	0	1	1	1	2	3	-0.87	0.337858
Q9NZN4	EH domain-containing protein 2 OS=Homo sapiens (Human) OX=9606 GN=EHD2 PE=1 SV=2	EHD2	EH domain-containing protein 2	-1.465	-2.361	-1.917	-1.381	-4.667	-2.905	5	0	2	5	1	3	1.07	0.337988
P51884	Lumican OS=Homo sapiens (Human) OX=9606 GN=LUM PE=1 SV=2	LUM	Lumican	2.955	2.059	4.705	4.146	-0.205	0.813	10	8	11	11	6	6	1.655	0.339328
P50897	Palmitoyl-protein thioesterase 1 OS=Homo sapiens (Human) OX=9606 GN=PPT1 PE=1 SV=1	PPT1	Palmitoyl-protein thioesterase 1	0.274	-0.836	-1.011	0.398	-2.843	-2.91	3	2	2	2	1	1	1.26	0.339613
P10768	S-formylglutathione hydrolase OS=Homo sapiens (Human) OX=9606 GN=ESD PE=1 SV=2	ESD	S-formylglutathione hydrolase	-2.941	-4.212	-3.109	-3.399	-4.037	-4.462	2	1	2	1	1	0	0.546	0.340246
Q96JB5	CDK5 regulatory subunit-associated protein 3 OS=Homo sapiens (Human) OX=9606 GN=CDK5RAP3 PE=1 SV=2	CDK5RAP3	CDK5 regulatory subunit-associated protein 3	-2.505	-2.657	-3.602	-2.469	-4.347	-4.194	0	0	0	2	0	0	0.749	0.340655
P49411	Elongation factor Tu, mitochondrial OS=Homo sapiens (Human) OX=9606 GN=TUFM PE=1 SV=2	TUFM	Elongation factor Tu, mitochondrial	-3.831	-3.41	-4.019	-1.893	-4.114	-3.093	1	0	1	4	2	3	-0.72	0.340979
Q9P2B4	CTTNBP2 N-terminal-like protein OS=Homo sapiens (Human) OX=9606 GN=CTTNBP2NL PE=1 SV=2	CTTNBP2NL	CTTNBP2 N-terminal-like protein	2.814	3.837	2.934	2.872	-3.647	3.116	1	0	1	1	0	1	2.415	0.34133
P02778	C-X-C motif chemokine 10 OS=Homo sapiens (Human) OX=9606 GN=CXCL10 PE=1 SV=2	CXCL10	C-X-C motif chemokine 10	-4.301	-4.623	-5.21	-4.568	0.686	-4.547	0	0	0	0	4	1	-1.902	0.342629
Q99519	Sialidase-1 OS=Homo sapiens (Human) OX=9606 GN=NEU1 PE=1 SV=1	NEU1	Sialidase-1	-3.902	-3.651	-2.586	-2.492	-2.778	-3.342	2	2	4	4	4	2	-0.509	0.343832
P35609	Alpha-actinin-2 OS=Homo sapiens (Human) OX=9606 GN=ACTN2 PE=1 SV=1	ACTN2	Alpha-actinin-2	0.778	-4.042	-3.953	-4.621	-4.446	-3.414	12	0	0	0	0	0	1.754	0.343923
Q99798	Aconitate hydratase, mitochondrial OS=Homo sapiens (Human) OX=9606 GN=ACO2 PE=1 SV=2	ACO2	Aconitate hydratase, mitochondrial	-3.948	-3.717	-4.203	-2.593	-4.226	-3.468	1	0	0	2	0	1	-0.527	0.344448
P04439	HLA class I histocompatibility antigen, A alpha chain OS=Homo sapiens (Human) OX=9606 GN=HLA-A PE=1 SV=2	HLA-A	HLA class I histocompatibility antigen, A alpha chain	-1.802	-0.465	1.78	-1.803	-0.934	-1.207	1	2	6	3	3	2	1.152	0.344669
P12882	Myosin-1 OS=Homo sapiens (Human) OX=9606 GN=MYH1 PE=1 SV=3	MYH1	Myosin-1	1.247	-3.857	-4.59	-4.426	-4.356	-4.308	7	0	0	0	0	0	1.963	0.345206
Q92692	Nectin-2 OS=Homo sapiens (Human) OX=9606 GN=NECTIN2 PE=1 SV=1	NECTIN2	Nectin-2	-1.276	-0.607	-0.629	-0.104	0.538	-1.188	4	3	3	4	5	2	-0.587	0.345752
O43633	Charged multivesicular body protein 2a OS=Homo sapiens (Human) OX=9606 GN=CHMP2A PE=1 SV=1	CHMP2A	Charged multivesicular body protein 2a	-0.303	-2.691	-2.531	-1.363	-4.508	-3.472	4	1	1	3	1	0	1.273	0.350167
Q96CG8	Collagen triple helix repeat-containing protein 1 OS=Homo sapiens (Human) OX=9606 GN=CTHRC1 PE=1 SV=1	CTHRC1	Collagen triple helix repeat-containing protein 1	3.606	3.159	4.602	4.443	2.69	-1.514	5	4	6	5	5	2	1.916	0.351332
Q10472	Polypeptide N-acetylgalactosaminyltransferase 1 OS=Homo sapiens (Human) OX=9606 GN=GALNT1 PE=1 SV=1	GALNT1	Polypeptide N-acetylgalactosaminyltransferase 1	-3.88	-3.921	-2.114	-1.115	-2.212	-3.624	0	0	1	3	0	0	-0.988	0.352165
Q13177	Serine/threonine-protein kinase PAK 2 OS=Homo sapiens (Human) OX=9606 GN=PAK2 PE=1 SV=3	PAK2	Serine/threonine-protein kinase PAK 2	-1.997	-0.695	-1.958	-0.719	-5.504	-2.981	1	2	3	4	0	0	1.518	0.353223
O43776	Asparagine--tRNA ligase, cytoplasmic OS=Homo sapiens (Human) OX=9606 GN=NARS1 PE=1 SV=1	NARS1	Asparagine--tRNA ligase, cytoplasmic	-1.945	-3.361	-2.34	-1.837	-4.059	-4.915	5	0	4	9	1	1	1.055	0.354963
P13807	Glycogen [starch] synthase, muscle OS=Homo sapiens (Human) OX=9606 GN=GYS1 PE=1 SV=2	GYS1	Glycogen [starch] synthase, muscle	-3.284	-5.007	-3.629	-4.335	-3.046	-1.475	1	0	0	0	1	0	-1.021	0.35637
Q96AE4	Far upstream element-binding protein 1 OS=Homo sapiens (Human) OX=9606 GN=FUBP1 PE=1 SV=3	FUBP1	Far upstream element-binding protein 1	-1.56	-3.174	-1.9	-1.702	-4.59	-3.374	6	0	3	4	0	3	1.011	0.35652
Q96AZ6	Interferon-stimulated gene 20 kDa protein OS=Homo sapiens (Human) OX=9606 GN=ISG20 PE=1 SV=2	ISG20	Interferon-stimulated gene 20 kDa protein	-3.847	-2.264	-2.033	-2.366	-5.259	-3.681	0	0	1	3	0	0	1.053	0.356604
Q15238	Pregnancy-specific beta-1-glycoprotein 5 OS=Homo sapiens (Human) OX=9606 GN=PSG5 PE=1 SV=3	PSG5	Pregnancy-specific beta-1-glycoprotein 5	-3.063	-4.761	-5.25	-3.929	-4.367	0.479	0	0	0	0	0	2	-1.752	0.356682
O00161	Synaptosomal-associated protein 23 OS=Homo sapiens (Human) OX=9606 GN=SNAP23 PE=1 SV=1	SNAP23	Synaptosomal-associated protein 23	-3.78	-1.164	-1.956	-1.444	-5.385	-4.507	0	2	0	2	0	0	1.479	0.357613
P30041	Peroxiredoxin-6 OS=Homo sapiens (Human) OX=9606 GN=PRDX6 PE=1 SV=3	PRDX6	Peroxiredoxin-6	-0.905	-1.792	-0.765	-0.879	-2.343	-1.922	4	4	5	6	4	3	0.561	0.358545
O60763	General vesicular transport factor p115 OS=Homo sapiens (Human) OX=9606 GN=USO1 PE=1 SV=2	USO1	General vesicular transport factor p115	-3.49	-3.874	-3.942	-3.517	-4.832	-4.215	0	0	1	3	0	0	0.419	0.359237
P12814	Alpha-actinin-1 OS=Homo sapiens (Human) OX=9606 GN=ACTN1 PE=1 SV=2	ACTN1	Alpha-actinin-1	-0.345	-1.698	-0.562	-0.624	-2.902	-1.513	22	13	22	22	12	21	0.811	0.359479
P09958	Furin OS=Homo sapiens (Human) OX=9606 GN=FURIN PE=1 SV=2	FURIN	Furin	-1.758	-3.668	-3.36	-3.093	-4.969	-3.32	0	0	0	1	0	1	0.865	0.359608
Q9NZH8	Interleukin-36 gamma OS=Homo sapiens (Human) OX=9606 GN=IL36G PE=1 SV=1	IL36G	Interleukin-36 gamma	-4.131	-4.949	-4.118	-1.597	-5.163	-3.129	0	0	0	2	0	1	-1.103	0.360375
Q9UBS4	DnaJ homolog subfamily B member 11 OS=Homo sapiens (Human) OX=9606 GN=DNAJB11 PE=1 SV=1	DNAJB11	DnaJ homolog subfamily B member 11	-0.304	-1.554	0.205	0.288	-2.022	-4.416	8	5	9	10	6	0	1.499	0.361153
Q15262	Receptor-type tyrosine-protein phosphatase kappa OS=Homo sapiens (Human) OX=9606 GN=PTPRK PE=1 SV=2	PTPRK	Receptor-type tyrosine-protein phosphatase kappa	-3.672	-1.448	-1.909	-1.898	-4.106	-4.121	1	4	4	8	1	1	1.032	0.361419
O95340	Bifunctional 3'-phosphoadenosine 5'-phosphosulfate synthase 2 OS=Homo sapiens (Human) OX=9606 GN=PAPSS2 PE=1 SV=2	PAPSS2	Bifunctional 3'-phosphoadenosine 5'-phosphosulfate synthase 2	-3.832	-4.841	-3.914	-2.728	-4.51	-3.475	0	0	0	3	0	1	-0.625	0.36341
Q9Y5Z4	Heme-binding protein 2 OS=Homo sapiens (Human) OX=9606 GN=HEBP2 PE=1 SV=1	HEBP2	Heme-binding protein 2	-2.498	-3.331	-2.621	-2.069	-4.633	-4.374	2	0	1	4	0	1	0.875	0.363974
P31153	S-adenosylmethionine synthase isoform type-2 OS=Homo sapiens (Human) OX=9606 GN=MAT2A PE=1 SV=1	MAT2A	S-adenosylmethionine synthase isoform type-2	-1.408	-3.297	-3.598	-3.574	-3.715	-3.175	2	0	2	1	1	1	0.721	0.36401
O43399	Tumor protein D54 OS=Homo sapiens (Human) OX=9606 GN=TPD52L2 PE=1 SV=2	TPD52L2	Tumor protein D54	0.079	-1.45	-1.139	0.042	-3.416	-2.661	9	6	5	7	4	4	1.175	0.364098
P40261	Nicotinamide N-methyltransferase OS=Homo sapiens (Human) OX=9606 GN=NNMT PE=1 SV=1	NNMT	Nicotinamide N-methyltransferase	-4.014	-2.049	-1.082	-1.8	-4.522	-4.75	0	0	2	2	0	1	1.309	0.364812
Q9UHD9	Ubiquilin-2 OS=Homo sapiens (Human) OX=9606 GN=UBQLN2 PE=1 SV=2	UBQLN2	Ubiquilin-2	-2.828	-3.248	-1.474	-2.097	-3.926	-4.044	3	4	4	5	3	2	0.839	0.367556
P28062	Proteasome subunit beta type-8 OS=Homo sapiens (Human) OX=9606 GN=PSMB8 PE=1 SV=3	PSMB8	Proteasome subunit beta type-8	-1.499	-2.749	-0.734	-0.365	-4.681	-4.649	0	0	1	1	0	0	1.571	0.367776
Q16853	Membrane primary amine oxidase OS=Homo sapiens (Human) OX=9606 GN=AOC3 PE=1 SV=3	AOC3	Membrane primary amine oxidase	-0.636	0.382	-2.602	-0.417	-2.375	-4.604	2	1	1	2	1	1	1.514	0.368126
P13010	X-ray repair cross-complementing protein 5 OS=Homo sapiens (Human) OX=9606 GN=XRCC5 PE=1 SV=3	XRCC5	X-ray repair cross-complementing protein 5	-3.851	-3.983	-3.758	-4.163	-4.401	-3.692	1	0	1	1	0	1	0.221	0.368265
Q13363	C-terminal-binding protein 1 OS=Homo sapiens (Human) OX=9606 GN=CTBP1 PE=1 SV=2	CTBP1	C-terminal-binding protein 1	-2.655	-3.38	-3.507	-2.515	-4.97	-4.473	1	0	1	3	0	0	0.805	0.368501
Q9H6S3	Epidermal growth factor receptor kinase substrate 8-like protein 2 OS=Homo sapiens (Human) OX=9606 GN=EPS8L2 PE=1 SV=2	EPS8L2	Epidermal growth factor receptor kinase substrate 8-like protein 2	-3.947	-4.392	-4.848	-3.369	-3.459	-4.775	0	0	0	1	0	1	-0.529	0.369775
Q14195	Dihydropyrimidinase-related protein 3 OS=Homo sapiens (Human) OX=9606 GN=DPYSL3 PE=1 SV=1	DPYSL3	Dihydropyrimidinase-related protein 3	-2.027	-3.032	-0.308	-1.323	-3.56	-3.927	10	3	15	14	6	2	1.147	0.370285
P48723	Heat shock 70 kDa protein 13 OS=Homo sapiens (Human) OX=9606 GN=HSPA13 PE=1 SV=1	HSPA13	Heat shock 70 kDa protein 13	-0.772	-1.189	-0.257	0.116	-2.547	-2.585	10	6	12	12	7	7	0.933	0.374406
P35900	Keratin, type I cytoskeletal 20 OS=Homo sapiens (Human) OX=9606 GN=KRT20 PE=1 SV=1	KRT20	Keratin, type I cytoskeletal 20	2.865	3.694	2.647	3.09	-4.648	3.018	1	1	0	0	0	1	2.582	0.374782
O76011	Keratin, type I cuticular Ha4 OS=Homo sapiens (Human) OX=9606 GN=KRT34 PE=1 SV=2	KRT34	Keratin, type I cuticular Ha4	-4.129	-4.083	0.588	-4.168	-4.219	-3.911	0	0	3	0	0	0	1.558	0.37663
P17931	Galectin-3 OS=Homo sapiens (Human) OX=9606 GN=LGALS3 PE=1 SV=5	LGALS3	Galectin-3	0.075	-1.113	0.218	1.116	-4.589	-2.429	4	3	3	4	1	1	1.694	0.379299
P06748	Nucleophosmin OS=Homo sapiens (Human) OX=9606 GN=NPM1 PE=1 SV=2	NPM1	Nucleophosmin	1.144	-1.109	-0.258	0.56	-2.838	-1.455	8	4	6	6	2	3	1.17	0.379395
Q6GMV3	Putative peptidyl-tRNA hydrolase PTRHD1 OS=Homo sapiens (Human) OX=9606 GN=PTRHD1 PE=1 SV=1	PTRHD1	Putative peptidyl-tRNA hydrolase PTRHD1	-3.74	-4.903	-4.925	-4.802	-5.085	-4.867	1	2	2	0	0	1	0.395	0.379425
Q8NI22	Multiple coagulation factor deficiency protein 2 OS=Homo sapiens (Human) OX=9606 GN=MCFD2 PE=1 SV=1	MCFD2	Multiple coagulation factor deficiency protein 2	-3.108	-3.669	-0.556	-1.859	-5.91	-4.027	0	1	3	2	0	1	1.488	0.380909
Q9BXK5	Bcl-2-like protein 13 OS=Homo sapiens (Human) OX=9606 GN=BCL2L13 PE=1 SV=1	BCL2L13	Bcl-2-like protein 13	-2.572	-5.574	-3.911	-2.477	-3.968	-2.723	1	0	1	1	0	0	-0.963	0.382846
Q14008	Cytoskeleton-associated protein 5 OS=Homo sapiens (Human) OX=9606 GN=CKAP5 PE=1 SV=3	CKAP5	Cytoskeleton-associated protein 5	-1.568	-3.013	-2.893	-1.645	-4.759	-4.192	1	0	1	2	0	0	1.04	0.383275
P10253	Lysosomal alpha-glucosidase OS=Homo sapiens (Human) OX=9606 GN=GAA PE=1 SV=4	GAA	Lysosomal alpha-glucosidase	-1.894	-1.341	-2.698	-1.947	-3.162	-2.38	1	1	0	1	1	0	0.519	0.383698
Q96RT1	Erbin OS=Homo sapiens (Human) OX=9606 GN=ERBIN PE=1 SV=2	ERBIN	Erbin	-2.991	-3.114	-5.371	-3.729	-4.606	-6.295	1	0	0	1	0	0	1.051	0.385252
O00469	Procollagen-lysine,2-oxoglutarate 5-dioxygenase 2 OS=Homo sapiens (Human) OX=9606 GN=PLOD2 PE=1 SV=2	PLOD2	Procollagen-lysine,2-oxoglutarate 5-dioxygenase 2	-2.555	-1.839	0.97	-0.525	-3.124	-4.292	7	7	20	15	8	1	1.506	0.385755
Q96C19	EF-hand domain-containing protein D2 OS=Homo sapiens (Human) OX=9606 GN=EFHD2 PE=1 SV=1	EFHD2	EF-hand domain-containing protein D2	-2.909	-1.951	-2.563	-1.881	-3.333	-4.767	4	2	4	5	4	2	0.853	0.38692
Q9P0R6	GSK3B-interacting protein OS=Homo sapiens (Human) OX=9606 GN=GSKIP PE=1 SV=2	GSKIP	GSK3B-interacting protein	-3.135	-4.518	-3.202	-1.241	-4.548	-1.829	1	0	0	1	0	2	-1.079	0.387453
Q92597	Protein NDRG1 OS=Homo sapiens (Human) OX=9606 GN=NDRG1 PE=1 SV=1	NDRG1	Protein NDRG1	-1.599	-3.345	-2.817	-2.201	-4.22	-3.636	4	0	2	3	0	0	0.765	0.388298
P39900	Macrophage metalloelastase OS=Homo sapiens (Human) OX=9606 GN=MMP12 PE=1 SV=1	MMP12	Macrophage metalloelastase	-3.753	-3.893	-4.117	-3.226	-4.687	2.656	0	0	0	6	0	20	-2.169	0.389044
Q9BRF8	Serine/threonine-protein phosphatase CPPED1 OS=Homo sapiens (Human) OX=9606 GN=CPPED1 PE=1 SV=3	CPPED1	Serine/threonine-protein phosphatase CPPED1	-2.488	-1.694	-2.865	-1.489	-3.921	-4.458	3	4	3	5	1	2	0.94	0.390134
P15309	Prostatic acid phosphatase OS=Homo sapiens (Human) OX=9606 GN=ACP3 PE=1 SV=3	ACP3	Prostatic acid phosphatase	-4.433	-3.306	-4.043	-2.25	-4.731	-2.215	0	0	0	2	0	3	-0.862	0.3904
O14786	Neuropilin-1 OS=Homo sapiens (Human) OX=9606 GN=NRP1 PE=1 SV=3	NRP1	Neuropilin-1	-1.709	-3.341	-2.978	-2.385	-3.597	-4.082	9	5	5	8	5	2	0.679	0.391209
Q9UBX5	Fibulin-5 OS=Homo sapiens (Human) OX=9606 GN=FBLN5 PE=1 SV=1	FBLN5	Fibulin-5	-2.788	-3.791	-2.952	-3.224	-3.216	1.787	3	2	2	4	3	11	-1.626	0.392518
P23193	Transcription elongation factor A protein 1 OS=Homo sapiens (Human) OX=9606 GN=TCEA1 PE=1 SV=2	TCEA1	Transcription elongation factor A protein 1	-0.859	-1.106	-1.557	0.115	-4.239	-3.22	2	1	2	3	0	1	1.274	0.392532
O60711	Leupaxin OS=Homo sapiens (Human) OX=9606 GN=LPXN PE=1 SV=1	LPXN	Leupaxin	-3.845	-4.059	-4.397	-4.543	-2.681	-3.459	1	0	1	1	2	0	-0.539	0.392854
O60687	Sushi repeat-containing protein SRPX2 OS=Homo sapiens (Human) OX=9606 GN=SRPX2 PE=1 SV=1	SRPX2	Sushi repeat-containing protein SRPX2	-1.77	-2.558	-1.727	-0.67	-2.377	-1.395	3	4	4	5	6	4	-0.538	0.394087
Q9NR45	Sialic acid synthase OS=Homo sapiens (Human) OX=9606 GN=NANS PE=1 SV=2	NANS	Sialic acid synthase	-0.197	-2.43	-0.918	-0.134	-4.513	-3.029	2	0	3	3	1	1	1.377	0.394387
Q69YQ0	Cytospin-A OS=Homo sapiens (Human) OX=9606 GN=SPECC1L PE=1 SV=2	SPECC1L	Cytospin-A	-2	-4.074	-3.557	-3.384	-3.788	-4.449	2	0	0	1	0	0	0.664	0.394633
Q9H4G4	Golgi-associated plant pathogenesis-related protein 1 OS=Homo sapiens (Human) OX=9606 GN=GLIPR2 PE=1 SV=3	GLIPR2	Golgi-associated plant pathogenesis-related protein 1	-3.036	-3.845	-2.519	-3.043	-1.411	-3.042	1	2	2	3	3	2	-0.634	0.395063
P78556	C-C motif chemokine 20 OS=Homo sapiens (Human) OX=9606 GN=CCL20 PE=1 SV=1	CCL20	C-C motif chemokine 20	-1.947	0.722	-0.279	-1.493	-3.615	-0.077	1	1	1	0	0	1	1.227	0.395313
Q6ZMP0	Thrombospondin type-1 domain-containing protein 4 OS=Homo sapiens (Human) OX=9606 GN=THSD4 PE=2 SV=2	THSD4	Thrombospondin type-1 domain-containing protein 4	-3.316	-4.591	-3.954	-3.145	-4.572	-1.099	1	1	0	0	0	4	-1.015	0.39767
P26038	Moesin OS=Homo sapiens (Human) OX=9606 GN=MSN PE=1 SV=3	MSN	Moesin	0.224	-0.695	0.866	1.368	-2.242	-2.485	18	12	21	21	10	10	1.251	0.398563
P37802	Transgelin-2 OS=Homo sapiens (Human) OX=9606 GN=TAGLN2 PE=1 SV=3	TAGLN2	Transgelin-2	1.838	0.694	1.839	2.709	-0.74	-1.311	12	9	13	13	11	7	1.238	0.399048
P50895	Basal cell adhesion molecule OS=Homo sapiens (Human) OX=9606 GN=BCAM PE=1 SV=2	BCAM	Basal cell adhesion molecule	-3.59	-3.844	-4.346	-0.864	-4.261	-3.64	2	0	1	5	0	0	-1.005	0.399884
P19474	E3 ubiquitin-protein ligase TRIM21 OS=Homo sapiens (Human) OX=9606 GN=TRIM21 PE=1 SV=1	TRIM21	E3 ubiquitin-protein ligase TRIM21	-4.382	-4.461	-2.795	-4.587	-4.372	-4.237	0	0	2	3	0	0	0.519	0.400165
Q8N114	Protein shisa-5 OS=Homo sapiens (Human) OX=9606 GN=SHISA5 PE=1 SV=1	SHISA5	Protein shisa-5	2.41	2.191	2.903	3.049	2.238	-4.892	1	1	1	1	1	0	2.37	0.402234
Q99848	Probable rRNA-processing protein EBP2 OS=Homo sapiens (Human) OX=9606 GN=EBNA1BP2 PE=1 SV=2	EBNA1BP2	Probable rRNA-processing protein EBP2	-1.923	-3.45	-3.469	-1.563	-3.131	-2.224	1	0	1	3	1	0	-0.641	0.402279
Q14204	Cytoplasmic dynein 1 heavy chain 1 OS=Homo sapiens (Human) OX=9606 GN=DYNC1H1 PE=1 SV=5	DYNC1H1	Cytoplasmic dynein 1 heavy chain 1	-3.405	-3.209	-3.576	-2.89	-4.452	-4.255	3	6	4	11	0	1	0.469	0.403265
O14672	Disintegrin and metalloproteinase domain-containing protein 10 OS=Homo sapiens (Human) OX=9606 GN=ADAM10 PE=1 SV=1	ADAM10	Disintegrin and metalloproteinase domain-containing protein 10	-0.68	-0.994	1.78	0.489	-1.659	-2.016	5	3	8	6	4	1	1.097	0.403467
P52594	Arf-GAP domain and FG repeat-containing protein 1 OS=Homo sapiens (Human) OX=9606 GN=AGFG1 PE=1 SV=2	AGFG1	Arf-GAP domain and FG repeat-containing protein 1	-4.043	-5.281	-3.99	-1.892	-1.327	-5.901	0	0	0	2	0	0	-1.398	0.404184
Q13247	Serine/arginine-rich splicing factor 6 OS=Homo sapiens (Human) OX=9606 GN=SRSF6 PE=1 SV=2	SRSF6	Serine/arginine-rich splicing factor 6	-0.871	-0.196	-0.78	0.243	-3.707	-1.625	1	1	2	2	0	1	1.081	0.404328
O94856	Neurofascin OS=Homo sapiens (Human) OX=9606 GN=NFASC PE=1 SV=4	NFASC	Neurofascin	-0.276	-4.13	-3.618	-4.092	-4.599	-2.965	11	0	0	0	0	2	1.21	0.404965
O75083	WD repeat-containing protein 1 OS=Homo sapiens (Human) OX=9606 GN=WDR1 PE=1 SV=4	WDR1	WD repeat-containing protein 1	-2.7	-3.243	-2.932	-2.408	-4.549	-3.709	5	5	8	6	3	1	0.597	0.405167
P13521	Secretogranin-2 OS=Homo sapiens (Human) OX=9606 GN=SCG2 PE=1 SV=2	SCG2	Secretogranin-2	-3.886	-3.896	-1.883	-2.709	-4.968	-4.707	0	1	12	4	0	1	0.907	0.40644
Q9UBX1	Cathepsin F OS=Homo sapiens (Human) OX=9606 GN=CTSF PE=1 SV=1	CTSF	Cathepsin F	-3.384	-4.253	-3.805	-3.113	-4.405	-1.457	2	0	3	2	2	5	-0.822	0.407379
Q9Y2D5	A-kinase anchor protein 2 OS=Homo sapiens (Human) OX=9606 GN=AKAP2 PE=1 SV=3	AKAP2	A-kinase anchor protein 2	-2.812	-2.629	-2.985	-3.006	-2.566	-4.511	1	2	3	2	2	1	0.553	0.407623
Q14847	LIM and SH3 domain protein 1 OS=Homo sapiens (Human) OX=9606 GN=LASP1 PE=1 SV=2	LASP1	LIM and SH3 domain protein 1	2.923	2.645	2.947	3.682	0.949	1.577	8	6	8	8	5	8	0.769	0.407911
O94979	Protein transport protein Sec31A OS=Homo sapiens (Human) OX=9606 GN=SEC31A PE=1 SV=3	SEC31A	Protein transport protein Sec31A	-0.372	-1.719	-0.761	-0.076	-2.608	-2.86	6	2	4	9	2	2	0.897	0.409367
Q8IWU6	Extracellular sulfatase Sulf-1 OS=Homo sapiens (Human) OX=9606 GN=SULF1 PE=1 SV=1	SULF1	Extracellular sulfatase Sulf-1	0.468	-3.878	-4.21	-4.088	-4.087	-3.621	8	0	0	0	0	2	1.392	0.410131
Q9Y266	Nuclear migration protein nudC OS=Homo sapiens (Human) OX=9606 GN=NUDC PE=1 SV=1	NUDC	Nuclear migration protein nudC	-1.359	-2.47	-1.412	-0.458	-4.347	-4.005	7	4	6	7	3	5	1.19	0.410272
P20810	Calpastatin OS=Homo sapiens (Human) OX=9606 GN=CAST PE=1 SV=4	CAST	Calpastatin	-2.762	-2.928	-2.912	-2.228	-3.49	-5.582	2	1	1	2	0	0	0.9	0.410344
Q15517	Corneodesmosin OS=Homo sapiens (Human) OX=9606 GN=CDSN PE=1 SV=3	CDSN	Corneodesmosin	-1.47	-0.509	0.254	-0.302	-4.027	-0.867	1	2	3	2	1	2	1.157	0.411115
P02766	Transthyretin OS=Homo sapiens (Human) OX=9606 GN=TTR PE=1 SV=1	TTR	Transthyretin	-1.996	-4.156	-3.058	-1.974	-3.837	0.33	1	0	0	0	0	1	-1.243	0.41149
Q9Y5V3	Melanoma-associated antigen D1 OS=Homo sapiens (Human) OX=9606 GN=MAGED1 PE=1 SV=3	MAGED1	Melanoma-associated antigen D1	-3.999	-3.056	-3.763	-3.636	-4.228	-3.86	0	0	1	1	0	1	0.302	0.414088
P25311	Zinc-alpha-2-glycoprotein OS=Homo sapiens (Human) OX=9606 GN=AZGP1 PE=1 SV=2	AZGP1	Zinc-alpha-2-glycoprotein	-2.617	-0.934	-0.96	-2.039	-2.701	-1.545	1	2	4	2	2	4	0.591	0.414208
P61916	NPC intracellular cholesterol transporter 2 OS=Homo sapiens (Human) OX=9606 GN=NPC2 PE=1 SV=1	NPC2	NPC intracellular cholesterol transporter 2	1.593	0.406	1.533	1.335	1.02	3.748	2	2	2	3	5	6	-0.857	0.415291
Q16881	Thioredoxin reductase 1, cytoplasmic OS=Homo sapiens (Human) OX=9606 GN=TXNRD1 PE=1 SV=3	TXNRD1	Thioredoxin reductase 1, cytoplasmic	-1.991	-2.972	-1.748	-2.373	-3.272	-2.371	4	1	5	6	2	5	0.435	0.41585
P01033	Metalloproteinase inhibitor 1 OS=Homo sapiens (Human) OX=9606 GN=TIMP1 PE=1 SV=1	TIMP1	Metalloproteinase inhibitor 1	3.684	4.336	5.719	5.428	6.082	4.352	3	3	3	4	7	6	-0.707	0.417848
O43155	Leucine-rich repeat transmembrane protein FLRT2 OS=Homo sapiens (Human) OX=9606 GN=FLRT2 PE=1 SV=1	FLRT2	Leucine-rich repeat transmembrane protein FLRT2	-2.304	-3.677	-4.125	-3.671	-3.719	-4.294	5	0	0	2	3	0	0.526	0.418257
O00142	Thymidine kinase 2, mitochondrial OS=Homo sapiens (Human) OX=9606 GN=TK2 PE=1 SV=4	TK2	Thymidine kinase 2, mitochondrial	0.279	-0.979	-0.838	1.038	-3.687	-3.021	1	0	1	1	0	0	1.377	0.418738
P21810	Biglycan OS=Homo sapiens (Human) OX=9606 GN=BGN PE=1 SV=2	BGN	Biglycan	0.447	-3.353	-1.61	-2.643	-2.27	-2.571	8	2	4	5	7	3	0.989	0.42093
Q32MZ4	Leucine-rich repeat flightless-interacting protein 1 OS=Homo sapiens (Human) OX=9606 GN=LRRFIP1 PE=1 SV=2	LRRFIP1	Leucine-rich repeat flightless-interacting protein 1	-3.336	-3.728	-3.885	-2.89	-4.008	-2.999	3	2	1	5	0	1	-0.351	0.420948
Q01973	Inactive tyrosine-protein kinase transmembrane receptor ROR1 OS=Homo sapiens (Human) OX=9606 GN=ROR1 PE=1 SV=2	ROR1	Inactive tyrosine-protein kinase transmembrane receptor ROR1	-5.109	-3.052	-3.127	-4.46	-4.294	-4.347	1	1	1	0	0	0	0.604	0.421405
P35659	Protein DEK OS=Homo sapiens (Human) OX=9606 GN=DEK PE=1 SV=1	DEK	Protein DEK	-3.618	-3.782	-4.767	-5.066	-4.037	-4.327	1	1	0	0	0	1	0.421	0.422476
P58107	Epiplakin OS=Homo sapiens (Human) OX=9606 GN=EPPK1 PE=1 SV=3	EPPK1	Epiplakin	-4.501	-3.672	-3.533	-1.642	-3.894	-3.971	0	0	1	9	0	0	-0.733	0.422872
Q9NTK5	Obg-like ATPase 1 OS=Homo sapiens (Human) OX=9606 GN=OLA1 PE=1 SV=2	OLA1	Obg-like ATPase 1	-1.86	-2.378	-1.594	-0.872	-3.508	-4.274	3	1	0	4	0	0	0.94	0.423358
P22307	Non-specific lipid-transfer protein OS=Homo sapiens (Human) OX=9606 GN=SCP2 PE=1 SV=2	SCP2	Non-specific lipid-transfer protein	-1.866	-5.012	-4.887	-2.845	-2.634	-3.462	1	0	0	1	1	1	-0.941	0.423969
O00299	Chloride intracellular channel protein 1 OS=Homo sapiens (Human) OX=9606 GN=CLIC1 PE=1 SV=4	CLIC1	Chloride intracellular channel protein 1	-1.451	-0.789	-0.241	0.593	-3.621	-3.097	5	4	5	6	4	1	1.214	0.425821
P19883	Follistatin OS=Homo sapiens (Human) OX=9606 GN=FST PE=1 SV=2	FST	Follistatin	-3.224	-3.946	-3.253	-3.324	-0.442	-3.802	3	3	3	3	10	3	-0.952	0.426324
P01833	Polymeric immunoglobulin receptor OS=Homo sapiens (Human) OX=9606 GN=PIGR PE=1 SV=4	PIGR	Polymeric immunoglobulin receptor	-3.585	-4.423	-4.829	-4.119	-4.578	-1.016	0	0	0	0	0	6	-1.041	0.426478
Q93052	Lipoma-preferred partner OS=Homo sapiens (Human) OX=9606 GN=LPP PE=1 SV=1	LPP	Lipoma-preferred partner	-2.271	-4.397	-2.855	-3.343	-4.455	-3.622	2	0	1	2	0	0	0.633	0.427267
Q8WUA8	Tsukushin OS=Homo sapiens (Human) OX=9606 GN=TSKU PE=2 SV=3	TSKU	Tsukushin	-1.184	-2.694	0.624	-0.006	-3.874	-3.498	2	1	3	2	1	0	1.375	0.428184
Q8N0X7	Spartin OS=Homo sapiens (Human) OX=9606 GN=SPART PE=1 SV=1	SPART	Spartin	-4.796	-4.462	-4.344	-1.927	-4.941	-4.292	1	0	0	2	0	0	-0.814	0.428965
P23284	Peptidyl-prolyl cis-trans isomerase B OS=Homo sapiens (Human) OX=9606 GN=PPIB PE=1 SV=2	PPIB	Peptidyl-prolyl cis-trans isomerase B	1.937	0.682	2.177	2.139	-0.826	0.907	10	7	11	10	9	10	0.859	0.429002
Q6NYC8	Phostensin OS=Homo sapiens (Human) OX=9606 GN=PPP1R18 PE=1 SV=1	PPP1R18	Phostensin	-3.909	-4.086	-3.212	-1.767	-4.955	-1.456	1	1	1	1	2	2	-1.009	0.42951
Q8WWX9	Selenoprotein M OS=Homo sapiens (Human) OX=9606 GN=SELENOM PE=1 SV=3	SELENOM	Selenoprotein M	-2.769	-3.35	-1.803	-3.186	-4.607	-2.268	1	0	1	0	0	1	0.714	0.431562
Q13561	Dynactin subunit 2 OS=Homo sapiens (Human) OX=9606 GN=DCTN2 PE=1 SV=4	DCTN2	Dynactin subunit 2	-1.285	-2.419	-2.524	-0.795	-4.422	-4.274	6	4	4	8	1	1	1.088	0.43321
Q9Y6C2	EMILIN-1 OS=Homo sapiens (Human) OX=9606 GN=EMILIN1 PE=1 SV=3	EMILIN1	EMILIN-1	0.448	-3.07	-1.689	-0.977	-3.867	-2.937	16	7	11	12	2	6	1.157	0.433879
Q08397	Lysyl oxidase homolog 1 OS=Homo sapiens (Human) OX=9606 GN=LOXL1 PE=1 SV=2	LOXL1	Lysyl oxidase homolog 1	1.01	-5.269	-2.216	-2.323	-4.454	-4.839	1	0	0	1	0	0	1.714	0.43445
O14657	Torsin-1B OS=Homo sapiens (Human) OX=9606 GN=TOR1B PE=1 SV=2	TOR1B	Torsin-1B	-4.875	-5.412	-3.332	-3.751	-4.462	-3.657	0	0	0	2	0	0	-0.583	0.435517
Q9UH65	Switch-associated protein 70 OS=Homo sapiens (Human) OX=9606 GN=SWAP70 PE=1 SV=1	SWAP70	Switch-associated protein 70	-2.239	-2.696	-3.563	-1.649	-4.19	2.448	1	0	0	2	0	0	-1.702	0.436828
Q01581	Hydroxymethylglutaryl-CoA synthase, cytoplasmic OS=Homo sapiens (Human) OX=9606 GN=HMGCS1 PE=1 SV=2	HMGCS1	Hydroxymethylglutaryl-CoA synthase, cytoplasmic	-3.303	-1.854	-1.84	-1.145	-4.47	-4.539	2	1	4	6	2	1	1.052	0.437322
Q13443	Disintegrin and metalloproteinase domain-containing protein 9 OS=Homo sapiens (Human) OX=9606 GN=ADAM9 PE=1 SV=1	ADAM9	Disintegrin and metalloproteinase domain-containing protein 9	0.835	-0.102	-0.658	1.135	-1.803	-2.19	4	3	4	4	3	2	0.978	0.438012
P29218	Inositol monophosphatase 1 OS=Homo sapiens (Human) OX=9606 GN=IMPA1 PE=1 SV=1	IMPA1	Inositol monophosphatase 1	-3.068	-4.334	-3.373	-2.331	-3.411	-3.613	0	0	1	3	0	2	-0.473	0.439247
Q8N6G6	ADAMTS-like protein 1 OS=Homo sapiens (Human) OX=9606 GN=ADAMTSL1 PE=1 SV=4	ADAMTSL1	ADAMTS-like protein 1	-2.65	-3.278	-3.564	-3.586	-2.813	-4.577	6	3	3	2	5	0	0.495	0.439999
P02671	Fibrinogen alpha chain OS=Homo sapiens (Human) OX=9606 GN=FGA PE=1 SV=2	FGA	Fibrinogen alpha chain	-2.845	-3.245	-2.845	-3.333	-5.058	-2.505	2	1	0	1	0	1	0.654	0.440203
P20929	Nebulin OS=Homo sapiens (Human) OX=9606 GN=NEB PE=1 SV=5	NEB	Nebulin	-0.99	-3.431	-5.011	-3.666	-4.119	-4.745	3	0	0	0	0	0	1.033	0.441586
P13797	Plastin-3 OS=Homo sapiens (Human) OX=9606 GN=PLS3 PE=1 SV=4	PLS3	Plastin-3	-1.41	-2.077	-1.944	-0.883	-3.043	-3.785	12	7	10	14	8	2	0.76	0.443007
P29966	Myristoylated alanine-rich C-kinase substrate OS=Homo sapiens (Human) OX=9606 GN=MARCKS PE=1 SV=4	MARCKS	Myristoylated alanine-rich C-kinase substrate	-3.578	-3.865	-2.896	-3.062	-4.646	-4.015	2	1	5	4	2	4	0.461	0.443415
O43707	Alpha-actinin-4 OS=Homo sapiens (Human) OX=9606 GN=ACTN4 PE=1 SV=2	ACTN4	Alpha-actinin-4	-0.125	-2.138	-1.93	-0.84	-3.359	-2.483	31	14	19	26	13	16	0.829	0.443423
P39023	60S ribosomal protein L3 OS=Homo sapiens (Human) OX=9606 GN=RPL3 PE=1 SV=2	RPL3	60S ribosomal protein L3	-0.529	-2.84	-1.003	-0.99	-4.907	-1.969	3	1	2	3	0	2	1.165	0.443502
P68371	Tubulin beta-4B chain OS=Homo sapiens (Human) OX=9606 GN=TUBB4B PE=1 SV=1	TUBB4B	Tubulin beta-4B chain	-0.937	-1.327	-2.129	-0.628	-3.347	-2.684	4	3	5	4	2	3	0.755	0.444142
Q9UBI6	Guanine nucleotide-binding protein G(I)/G(S)/G(O) subunit gamma-12 OS=Homo sapiens (Human) OX=9606 GN=GNG12 PE=1 SV=3	GNG12	Guanine nucleotide-binding protein G(I)/G(S)/G(O) subunit gamma-12	-3.117	-1.219	-0.682	-0.65	-5.138	-3.016	1	2	2	2	0	1	1.262	0.445203
A6NHG4	D-dopachrome decarboxylase-like protein OS=Homo sapiens (Human) OX=9606 GN=DDTL PE=2 SV=1	DDTL	D-dopachrome decarboxylase-like protein	0.991	-6.258	-5.246	1.179	-4.588	0.194	1	0	0	1	1	1	-2.432	0.446291
P10124	Serglycin OS=Homo sapiens (Human) OX=9606 GN=SRGN PE=1 SV=3	SRGN	Serglycin	-1.724	-4.602	-4.581	-4.648	-2.598	1.461	1	0	0	0	1	3	-1.707	0.44843
P05787	Keratin, type II cytoskeletal 8 OS=Homo sapiens (Human) OX=9606 GN=KRT8 PE=1 SV=7	KRT8	Keratin, type II cytoskeletal 8	-4.096	-2.061	-1.678	-1.58	-3.066	-0.57	2	4	11	9	9	13	-0.873	0.449678
P31151	Protein S100-A7 OS=Homo sapiens (Human) OX=9606 GN=S100A7 PE=1 SV=4	S100A7	Protein S100-A7	-1.111	-2.615	0.727	-0.627	-2.562	-2.78	3	2	6	4	1	2	0.99	0.450131
Q8WVV4	Protein POF1B OS=Homo sapiens (Human) OX=9606 GN=POF1B PE=1 SV=3	POF1B	Protein POF1B	-3.73	-3.241	-1.252	-3.41	-3.771	-3.017	1	1	7	1	2	5	0.658	0.450753
P15848	Arylsulfatase B OS=Homo sapiens (Human) OX=9606 GN=ARSB PE=1 SV=1	ARSB	Arylsulfatase B	-2.444	-2.624	-3.321	-2.529	-2.429	-2.726	2	0	1	2	2	0	-0.235	0.451041
Q96CV9	Optineurin OS=Homo sapiens (Human) OX=9606 GN=OPTN PE=1 SV=3	OPTN	Optineurin	-3.146	-3.538	-2.258	-2.061	-4.819	-4.413	2	1	2	6	1	1	0.784	0.451057
Q15293	Reticulocalbin-1 OS=Homo sapiens (Human) OX=9606 GN=RCN1 PE=1 SV=1	RCN1	Reticulocalbin-1	-0.233	-0.58	1.815	1.423	-1.297	-2.656	7	6	8	8	6	4	1.178	0.451525
P21291	Cysteine and glycine-rich protein 1 OS=Homo sapiens (Human) OX=9606 GN=CSRP1 PE=1 SV=3	CSRP1	Cysteine and glycine-rich protein 1	-0.538	-1.777	-0.567	-0.11	-2.869	-2.218	6	1	7	6	3	6	0.772	0.452108
P54764	Ephrin type-A receptor 4 OS=Homo sapiens (Human) OX=9606 GN=EPHA4 PE=1 SV=1	EPHA4	Ephrin type-A receptor 4	-2.899	-2.244	-3.065	-1.931	-5.284	-3.491	2	1	2	2	0	0	0.833	0.452119
Q9P1T7	MyoD family inhibitor domain-containing protein OS=Homo sapiens (Human) OX=9606 GN=MDFIC PE=1 SV=2	MDFIC	MyoD family inhibitor domain-containing protein	-2.864	-4.497	-4.751	-3.705	-5.276	-5.032	1	0	1	1	0	0	0.634	0.454973
Q9UPN3	Microtubule-actin cross-linking factor 1, isoforms 1/2/3/5 OS=Homo sapiens (Human) OX=9606 GN=MACF1 PE=1 SV=4	MACF1	Microtubule-actin cross-linking factor 1, isoforms 1/2/3/5	-3.316	-3.817	-3.195	-2.757	-4.552	-4.589	2	0	6	12	0	0	0.523	0.455497
Q13200	26S proteasome non-ATPase regulatory subunit 2 OS=Homo sapiens (Human) OX=9606 GN=PSMD2 PE=1 SV=3	PSMD2	26S proteasome non-ATPase regulatory subunit 2	-2.747	-3.065	-2.81	-1.919	-4.698	-4.11	5	1	6	9	1	1	0.702	0.455878
Q9NQW7	Xaa-Pro aminopeptidase 1 OS=Homo sapiens (Human) OX=9606 GN=XPNPEP1 PE=1 SV=3	XPNPEP1	Xaa-Pro aminopeptidase 1	-3.61	-4.149	-2.185	-2.749	-4.205	-5.346	1	0	1	1	0	0	0.786	0.4559
Q92743	Serine protease HTRA1 OS=Homo sapiens (Human) OX=9606 GN=HTRA1 PE=1 SV=1	HTRA1	Serine protease HTRA1	-0.534	-3.249	-3.023	-2.9	-1.746	2.273	7	2	4	4	6	7	-1.477	0.456236
Q9UHI8	A disintegrin and metalloproteinase with thrombospondin motifs 1 OS=Homo sapiens (Human) OX=9606 GN=ADAMTS1 PE=1 SV=4	ADAMTS1	A disintegrin and metalloproteinase with thrombospondin motifs 1	-3.745	-2.268	-2.79	-4.588	-3.438	-2.57	1	4	4	1	1	5	0.598	0.457165
Q96DA0	Zymogen granule protein 16 homolog B OS=Homo sapiens (Human) OX=9606 GN=ZG16B PE=1 SV=3	ZG16B	Zymogen granule protein 16 homolog B	-3.845	-3.906	-4.186	-4.412	-4.355	2.456	0	2	2	0	0	4	-1.875	0.4574
Q96RU3	Formin-binding protein 1 OS=Homo sapiens (Human) OX=9606 GN=FNBP1 PE=1 SV=2	FNBP1	Formin-binding protein 1	-3.014	-3.795	-2.475	-1.849	-5.154	-5.155	0	0	0	2	0	0	0.958	0.457702
P47929	Galectin-7 OS=Homo sapiens (Human) OX=9606 GN=LGALS7B PE=1 SV=2	LGALS7B	Galectin-7	-1.82	-1.874	0.741	0.469	-3.129	-4.481	1	2	5	5	2	0	1.396	0.460198
Q8WW12	PEST proteolytic signal-containing nuclear protein OS=Homo sapiens (Human) OX=9606 GN=PCNP PE=1 SV=2	PCNP	PEST proteolytic signal-containing nuclear protein	-3.907	-3.864	-2.738	-2.883	-4.187	-5.53	0	0	1	2	0	0	0.697	0.460492
Q96EU7	C1GALT1-specific chaperone 1 OS=Homo sapiens (Human) OX=9606 GN=C1GALT1C1 PE=1 SV=1	C1GALT1C1	C1GALT1-specific chaperone 1	-3.786	-4.045	-3.96	-1.673	-3.986	-4.166	0	1	1	3	1	0	-0.655	0.461973
Q6UXH9	Inactive serine protease PAMR1 OS=Homo sapiens (Human) OX=9606 GN=PAMR1 PE=1 SV=1	PAMR1	Inactive serine protease PAMR1	-3.88	-4.509	-3.429	-4.012	-4.549	1.571	1	0	2	0	0	7	-1.609	0.462345
P20930	Filaggrin OS=Homo sapiens (Human) OX=9606 GN=FLG PE=1 SV=3	FLG	Filaggrin	-2.532	-2.096	-0.955	-1.205	-3.891	-2.696	2	2	3	2	2	2	0.736	0.462947
P50502	Hsc70-interacting protein OS=Homo sapiens (Human) OX=9606 GN=ST13 PE=1 SV=2	ST13	Hsc70-interacting protein	1.123	0.555	0.501	1.991	-1.735	-0.849	7	6	7	10	6	5	0.924	0.463734
Q12907	Vesicular integral-membrane protein VIP36 OS=Homo sapiens (Human) OX=9606 GN=LMAN2 PE=1 SV=1	LMAN2	Vesicular integral-membrane protein VIP36	-2.768	-3.24	-2.388	-1.268	-2.851	-2.862	1	3	5	8	5	4	-0.471	0.464884
P80075	C-C motif chemokine 8 OS=Homo sapiens (Human) OX=9606 GN=CCL8 PE=1 SV=2	CCL8	C-C motif chemokine 8	-0.357	0.837	1.632	0.266	1.257	-2.407	1	0	1	0	2	0	0.998	0.464972
P04062	Lysosomal acid glucosylceramidase OS=Homo sapiens (Human) OX=9606 GN=GBA PE=1 SV=3	GBA	Lysosomal acid glucosylceramidase	-2.374	-3.989	-3.876	-3.137	-4.19	-4.528	1	0	2	3	0	1	0.539	0.465179
Q9UDT6	CAP-Gly domain-containing linker protein 2 OS=Homo sapiens (Human) OX=9606 GN=CLIP2 PE=1 SV=1	CLIP2	CAP-Gly domain-containing linker protein 2	-3.073	-4.429	-3.851	-3.709	-5.249	-3.901	6	0	3	5	0	2	0.502	0.466263
P26373	60S ribosomal protein L13 OS=Homo sapiens (Human) OX=9606 GN=RPL13 PE=1 SV=4	RPL13	60S ribosomal protein L13	-1.534	-2.321	-2.734	-0.424	-3.304	-0.381	4	2	4	6	1	3	-0.827	0.466659
Q9UBC2	Epidermal growth factor receptor substrate 15-like 1 OS=Homo sapiens (Human) OX=9606 GN=EPS15L1 PE=1 SV=1	EPS15L1	Epidermal growth factor receptor substrate 15-like 1	-2.826	-3.889	-3.014	-2.569	-4.505	-4.341	7	1	2	10	1	1	0.562	0.467485
Q15642	Cdc42-interacting protein 4 OS=Homo sapiens (Human) OX=9606 GN=TRIP10 PE=1 SV=3	TRIP10	Cdc42-interacting protein 4	-1.67	-2.832	-3.877	-2.281	-3.785	-4.511	3	1	1	2	0	0	0.733	0.468142
Q07157	Tight junction protein ZO-1 OS=Homo sapiens (Human) OX=9606 GN=TJP1 PE=1 SV=3	TJP1	Tight junction protein ZO-1	-3.071	-3.369	-3.557	-2.607	-4.706	-4.253	4	0	4	5	1	0	0.523	0.468149
Q9NZT1	Calmodulin-like protein 5 OS=Homo sapiens (Human) OX=9606 GN=CALML5 PE=1 SV=2	CALML5	Calmodulin-like protein 5	-3.372	-3.715	-1.359	0.721	-2.414	-3.33	2	3	3	6	2	0	-1.14	0.46975
Q9NRN5	Olfactomedin-like protein 3 OS=Homo sapiens (Human) OX=9606 GN=OLFML3 PE=2 SV=1	OLFML3	Olfactomedin-like protein 3	0.897	1.707	3.183	2.861	0.646	-0.624	10	11	13	13	12	4	0.968	0.471526
P15151	Poliovirus receptor OS=Homo sapiens (Human) OX=9606 GN=PVR PE=1 SV=2	PVR	Poliovirus receptor	0.901	0.338	0.591	1.641	-3.361	0.022	5	4	4	4	1	2	1.176	0.472109
Q9NZM1	Myoferlin OS=Homo sapiens (Human) OX=9606 GN=MYOF PE=1 SV=1	MYOF	Myoferlin	-2.697	-3.122	-3.063	-3.685	-5.355	-2.097	2	0	0	0	0	2	0.752	0.473162
O75173	A disintegrin and metalloproteinase with thrombospondin motifs 4 OS=Homo sapiens (Human) OX=9606 GN=ADAMTS4 PE=1 SV=3	ADAMTS4	A disintegrin and metalloproteinase with thrombospondin motifs 4	-3.862	-3.353	-2.893	-2.313	-4.351	-1.096	1	0	2	3	0	5	-0.783	0.473412
P04040	Catalase OS=Homo sapiens (Human) OX=9606 GN=CAT PE=1 SV=3	CAT	Catalase	-2.628	-1.558	-1.436	-2.852	-2.607	-1.497	4	6	7	7	7	8	0.445	0.473995
P11217	Glycogen phosphorylase, muscle form OS=Homo sapiens (Human) OX=9606 GN=PYGM PE=1 SV=6	PYGM	Glycogen phosphorylase, muscle form	1.878	-3.02	-4.511	-3.653	-3.641	-2.949	4	1	0	0	0	0	1.53	0.475101
Q6EMK4	Vasorin OS=Homo sapiens (Human) OX=9606 GN=VASN PE=1 SV=1	VASN	Vasorin	0.385	-0.91	1.534	1.245	-2.227	-0.916	6	4	7	6	4	6	0.969	0.476414
Q29980	MHC class I polypeptide-related sequence B OS=Homo sapiens (Human) OX=9606 GN=MICB PE=1 SV=1	MICB	MHC class I polypeptide-related sequence B	-3.64	-2.815	-4.128	-0.642	-4.874	-2.011	0	1	1	3	0	0	-1.019	0.478393
P43235	Cathepsin K OS=Homo sapiens (Human) OX=9606 GN=CTSK PE=1 SV=1	CTSK	Cathepsin K	-1.882	-3.082	-4.115	-2.409	-4.089	1.73	2	0	0	2	0	4	-1.437	0.479621
P51688	N-sulphoglucosamine sulphohydrolase OS=Homo sapiens (Human) OX=9606 GN=SGSH PE=1 SV=1	SGSH	N-sulphoglucosamine sulphohydrolase	-3.021	-3.242	-2.43	-2.258	-3.827	-4.033	1	1	2	3	0	0	0.475	0.480114
P22626	Heterogeneous nuclear ribonucleoproteins A2/B1 OS=Homo sapiens (Human) OX=9606 GN=HNRNPA2B1 PE=1 SV=2	HNRNPA2B1	Heterogeneous nuclear ribonucleoproteins A2/B1	1.811	-0.716	1.15	1.402	-2.068	-0.021	11	7	10	10	5	8	0.977	0.481105
P13667	Protein disulfide-isomerase A4 OS=Homo sapiens (Human) OX=9606 GN=PDIA4 PE=1 SV=2	PDIA4	Protein disulfide-isomerase A4	-1.693	-4.097	-3.295	-2.742	-5.117	-3.531	7	2	4	4	1	2	0.768	0.482425
P29590	Protein PML OS=Homo sapiens (Human) OX=9606 GN=PML PE=1 SV=3	PML	Protein PML	-2.375	-3.473	-2.842	-4.871	-1.64	-4.724	0	0	1	1	1	0	0.849	0.483623
P27824	Calnexin OS=Homo sapiens (Human) OX=9606 GN=CANX PE=1 SV=2	CANX	Calnexin	-2.433	-3.232	-2.812	-1.827	-4.51	-4.159	2	1	2	2	0	1	0.673	0.483879
P54920	Alpha-soluble NSF attachment protein OS=Homo sapiens (Human) OX=9606 GN=NAPA PE=1 SV=3	NAPA	Alpha-soluble NSF attachment protein	-2.023	-0.485	-1.558	-0.303	-3.594	-2.666	3	2	3	5	0	1	0.832	0.484194
P31431	Syndecan-4 OS=Homo sapiens (Human) OX=9606 GN=SDC4 PE=1 SV=2	SDC4	Syndecan-4	-2.261	-1.881	-1.068	-1.26	-3.923	-2.028	2	1	4	2	2	5	0.667	0.484349
O00233	26S proteasome non-ATPase regulatory subunit 9 OS=Homo sapiens (Human) OX=9606 GN=PSMD9 PE=1 SV=3	PSMD9	26S proteasome non-ATPase regulatory subunit 9	-1.199	-1.464	-3.051	-0.772	-3.199	-4.707	4	4	3	4	1	1	0.988	0.484551
P23381	Tryptophan--tRNA ligase, cytoplasmic OS=Homo sapiens (Human) OX=9606 GN=WARS1 PE=1 SV=2	WARS1	Tryptophan--tRNA ligase, cytoplasmic	-3.291	-2.833	-2.068	-1.604	-4.772	-4.215	4	2	3	4	0	0	0.8	0.484777
Q86UP2	Kinectin OS=Homo sapiens (Human) OX=9606 GN=KTN1 PE=1 SV=1	KTN1	Kinectin	-3.327	-4.241	-3.249	-3.294	-4.638	-4.043	9	2	9	9	1	2	0.386	0.485331
Q10589	Bone marrow stromal antigen 2 OS=Homo sapiens (Human) OX=9606 GN=BST2 PE=1 SV=1	BST2	Bone marrow stromal antigen 2	-3.382	-3.296	-3.32	-0.356	-3.549	-3.615	0	0	1	2	1	0	-0.826	0.485477
Q96HC4	PDZ and LIM domain protein 5 OS=Homo sapiens (Human) OX=9606 GN=PDLIM5 PE=1 SV=5	PDLIM5	PDZ and LIM domain protein 5	-1.711	-3.065	-1.913	-2.277	-4.729	-1.927	5	1	3	4	1	4	0.748	0.486533
Q92859	Neogenin OS=Homo sapiens (Human) OX=9606 GN=NEO1 PE=1 SV=2	NEO1	Neogenin	0.067	-0.856	-2.53	-0.611	-2.705	-2.286	10	5	3	8	5	7	0.76	0.48659
P09104	Gamma-enolase OS=Homo sapiens (Human) OX=9606 GN=ENO2 PE=1 SV=3	ENO2	Gamma-enolase	-1.269	-4.032	-2.207	-2.268	-3.331	-4.148	4	1	3	3	0	2	0.746	0.487594
Q4G148	Glucoside xylosyltransferase 1 OS=Homo sapiens (Human) OX=9606 GN=GXYLT1 PE=1 SV=2	GXYLT1	Glucoside xylosyltransferase 1	-2.138	-5.179	-2.249	-2.891	-4.343	-5.029	2	0	2	1	0	0	0.899	0.488079
Q9NY97	N-acetyllactosaminide beta-1,3-N-acetylglucosaminyltransferase 2 OS=Homo sapiens (Human) OX=9606 GN=B3GNT2 PE=1 SV=2	B3GNT2	N-acetyllactosaminide beta-1,3-N-acetylglucosaminyltransferase 2	-1.457	-2.236	-0.275	-0.348	-2.163	-4.497	1	0	2	3	1	1	1.014	0.488256
P61978	Heterogeneous nuclear ribonucleoprotein K OS=Homo sapiens (Human) OX=9606 GN=HNRNPK PE=1 SV=1	HNRNPK	Heterogeneous nuclear ribonucleoprotein K	-1.076	-2.562	-2.014	-1.431	-4.067	-2.2	12	7	6	11	4	9	0.682	0.488335
P11047	Laminin subunit gamma-1 OS=Homo sapiens (Human) OX=9606 GN=LAMC1 PE=1 SV=3	LAMC1	Laminin subunit gamma-1	-2.279	-2.309	-1.938	-1.554	-3.212	-2.972	17	14	20	19	14	12	0.404	0.488724
P62280	40S ribosomal protein S11 OS=Homo sapiens (Human) OX=9606 GN=RPS11 PE=1 SV=3	RPS11	40S ribosomal protein S11	-3.193	-3.101	-3.783	-2.666	-4.298	-0.691	0	0	0	3	0	3	-0.808	0.490162
P46060	Ran GTPase-activating protein 1 OS=Homo sapiens (Human) OX=9606 GN=RANGAP1 PE=1 SV=1	RANGAP1	Ran GTPase-activating protein 1	-1.949	-3.495	-2.703	-1.789	-4.216	-4.26	4	1	4	6	2	1	0.706	0.490256
P56537	Eukaryotic translation initiation factor 6 OS=Homo sapiens (Human) OX=9606 GN=EIF6 PE=1 SV=1	EIF6	Eukaryotic translation initiation factor 6	-3.179	-4.248	-2.149	-2.224	-3.631	-1.885	2	2	3	3	2	3	-0.612	0.490889
O00462	Beta-mannosidase OS=Homo sapiens (Human) OX=9606 GN=MANBA PE=1 SV=3	MANBA	Beta-mannosidase	-3.6	-3.992	-4.447	-2.99	-4.525	-3.328	1	1	1	5	0	0	-0.398	0.490907
Q13136	Liprin-alpha-1 OS=Homo sapiens (Human) OX=9606 GN=PPFIA1 PE=1 SV=1	PPFIA1	Liprin-alpha-1	-0.909	-4.301	0.034	-0.504	-4.304	-4.599	1	0	0	1	0	0	1.41	0.491232
Q9H2G2	STE20-like serine/threonine-protein kinase OS=Homo sapiens (Human) OX=9606 GN=SLK PE=1 SV=1	SLK	STE20-like serine/threonine-protein kinase	-2.226	-2.951	-1.817	-1.206	-4.136	-3.911	1	1	3	3	0	1	0.753	0.49245
Q9H7C9	Mth938 domain-containing protein OS=Homo sapiens (Human) OX=9606 GN=AAMDC PE=1 SV=1	AAMDC	Mth938 domain-containing protein	-2.487	-4.733	-2.408	-1.234	-2.847	-3.316	0	0	1	3	1	1	-0.744	0.494089
Q66K74	Microtubule-associated protein 1S OS=Homo sapiens (Human) OX=9606 GN=MAP1S PE=1 SV=2	MAP1S	Microtubule-associated protein 1S	-1.355	-1.593	-1.014	-0.691	-0.967	-1.595	1	0	1	1	0	0	-0.237	0.495235
Q8IXL6	Extracellular serine/threonine protein kinase FAM20C OS=Homo sapiens (Human) OX=9606 GN=FAM20C PE=1 SV=2	FAM20C	Extracellular serine/threonine protein kinase FAM20C	9.209	7.793	5.943	8.803	2.348	6.981	2	1	0	1	0	1	1.605	0.495371
P04179	Superoxide dismutase [Mn], mitochondrial OS=Homo sapiens (Human) OX=9606 GN=SOD2 PE=1 SV=3	SOD2	Superoxide dismutase [Mn], mitochondrial	-2.769	-3.26	-3.146	-1.714	-4.1	-1.431	3	2	3	4	2	4	-0.643	0.495589
P07384	Calpain-1 catalytic subunit OS=Homo sapiens (Human) OX=9606 GN=CAPN1 PE=1 SV=1	CAPN1	Calpain-1 catalytic subunit	-3.754	-0.373	-1.215	-3.365	-2.512	-1.932	1	3	1	1	0	1	0.822	0.495701
Q14134	Tripartite motif-containing protein 29 OS=Homo sapiens (Human) OX=9606 GN=TRIM29 PE=1 SV=2	TRIM29	Tripartite motif-containing protein 29	-4.08	-3.715	-4.508	-1.117	-4.853	-3.785	0	0	0	3	0	0	-0.849	0.49576
Q13287	N-myc-interactor OS=Homo sapiens (Human) OX=9606 GN=NMI PE=1 SV=2	NMI	N-myc-interactor	-4.288	-3.895	-4.063	-2.213	-3.634	-4.739	0	0	0	3	1	0	-0.553	0.4961
P22061	Protein-L-isoaspartate(D-aspartate) O-methyltransferase OS=Homo sapiens (Human) OX=9606 GN=PCMT1 PE=1 SV=4	PCMT1	Protein-L-isoaspartate(D-aspartate) O-methyltransferase	1.053	-0.379	-0.268	1.255	-2.716	-0.899	9	7	10	10	5	6	0.922	0.497345
Q9Y3C8	Ubiquitin-fold modifier-conjugating enzyme 1 OS=Homo sapiens (Human) OX=9606 GN=UFC1 PE=1 SV=3	UFC1	Ubiquitin-fold modifier-conjugating enzyme 1	-0.859	-2.445	-2.573	-1.411	-4.706	-2.283	2	0	1	1	0	0	0.841	0.497977
O94804	Serine/threonine-protein kinase 10 OS=Homo sapiens (Human) OX=9606 GN=STK10 PE=1 SV=1	STK10	Serine/threonine-protein kinase 10	-3.995	-2.821	-3.729	-2.649	-4.534	-5.261	1	0	0	1	0	0	0.633	0.500308
P27482	Calmodulin-like protein 3 OS=Homo sapiens (Human) OX=9606 GN=CALML3 PE=1 SV=2	CALML3	Calmodulin-like protein 3	-4.032	-3.652	-3.283	0.287	-3.788	-4.244	0	0	4	6	0	0	-1.074	0.501618
Q9UKU9	Angiopoietin-related protein 2 OS=Homo sapiens (Human) OX=9606 GN=ANGPTL2 PE=1 SV=1	ANGPTL2	Angiopoietin-related protein 2	-3.377	-2.41	-1.45	-1.183	-4.141	-4.564	0	4	8	8	1	0	0.884	0.502511
Q9UNH7	Sorting nexin-6 OS=Homo sapiens (Human) OX=9606 GN=SNX6 PE=1 SV=1	SNX6	Sorting nexin-6	-3.101	-3.671	-3.011	-1.802	-2.138	-4.157	0	0	0	4	1	0	-0.562	0.502828
P35579	Myosin-9 OS=Homo sapiens (Human) OX=9606 GN=MYH9 PE=1 SV=4	MYH9	Myosin-9	-2.008	-2.95	-2.588	-2.201	-4.064	-2.652	33	20	28	35	18	29	0.457	0.504986
P20042	Eukaryotic translation initiation factor 2 subunit 2 OS=Homo sapiens (Human) OX=9606 GN=EIF2S2 PE=1 SV=2	EIF2S2	Eukaryotic translation initiation factor 2 subunit 2	-1.831	-3.131	-2.206	-1.964	-2.792	-0.988	3	1	4	5	2	2	-0.475	0.505075
P37837	Transaldolase OS=Homo sapiens (Human) OX=9606 GN=TALDO1 PE=1 SV=2	TALDO1	Transaldolase	-2.777	-3.288	-3.436	-2.431	-4.383	-4.09	2	2	2	6	1	1	0.468	0.505336
O75347	Tubulin-specific chaperone A OS=Homo sapiens (Human) OX=9606 GN=TBCA PE=1 SV=3	TBCA	Tubulin-specific chaperone A	4.121	2.787	2.568	4.502	-0.297	2.058	4	3	4	4	2	4	1.071	0.506166
O94855	Protein transport protein Sec24D OS=Homo sapiens (Human) OX=9606 GN=SEC24D PE=1 SV=2	SEC24D	Protein transport protein Sec24D	-3.343	-4.338	-3.422	-3.64	-4.984	-3.665	1	0	1	1	0	0	0.395	0.509595
O75665	Oral-facial-digital syndrome 1 protein OS=Homo sapiens (Human) OX=9606 GN=OFD1 PE=1 SV=1	OFD1	Oral-facial-digital syndrome 1 protein	-1.693	-5.671	-4.154	-1.794	-3.806	-3.107	1	1	1	1	0	0	-0.937	0.51109
Q9NR12	PDZ and LIM domain protein 7 OS=Homo sapiens (Human) OX=9606 GN=PDLIM7 PE=1 SV=1	PDLIM7	PDZ and LIM domain protein 7	-2.519	-2.682	-1.694	-1.38	-3.742	-3.533	2	1	3	3	1	2	0.586	0.511418
P28838	Cytosol aminopeptidase OS=Homo sapiens (Human) OX=9606 GN=LAP3 PE=1 SV=3	LAP3	Cytosol aminopeptidase	-3.313	-3.189	-2.446	-1.957	-3.224	-2.776	4	4	7	10	8	3	-0.331	0.511574
Q07092	Collagen alpha-1(XVI) chain OS=Homo sapiens (Human) OX=9606 GN=COL16A1 PE=1 SV=2	COL16A1	Collagen alpha-1(XVI) chain	-2.091	-3.666	-2.654	-2.157	-3.553	-4.444	2	2	4	4	2	0	0.581	0.512661
P31146	Coronin-1A OS=Homo sapiens (Human) OX=9606 GN=CORO1A PE=1 SV=4	CORO1A	Coronin-1A	-1.866	-1.758	-1.538	-2.034	-4.037	-1.012	2	1	2	3	1	4	0.64	0.513214
Q96FQ6	Protein S100-A16 OS=Homo sapiens (Human) OX=9606 GN=S100A16 PE=1 SV=1	S100A16	Protein S100-A16	-3.185	-2.833	-1.201	-1.56	-3.977	-3.803	1	1	1	1	0	1	0.707	0.514325
Q8IW75	Serpin A12 OS=Homo sapiens (Human) OX=9606 GN=SERPINA12 PE=1 SV=1	SERPINA12	Serpin A12	-4.436	-2.508	-3.015	-4.232	-3.902	-3.211	1	1	3	1	0	2	0.462	0.517299
Q71UM5	40S ribosomal protein S27-like OS=Homo sapiens (Human) OX=9606 GN=RPS27L PE=1 SV=3	RPS27L	40S ribosomal protein S27-like	-3.672	-0.968	-1.494	-0.746	-4.266	-4.126	0	0	0	1	0	1	1.001	0.518914
P20160	Azurocidin OS=Homo sapiens (Human) OX=9606 GN=AZU1 PE=1 SV=3	AZU1	Azurocidin	-3.2	-2.692	-2.928	-2.588	-4.374	2.535	0	0	0	0	0	2	-1.465	0.519379
P02771	Alpha-fetoprotein OS=Homo sapiens (Human) OX=9606 GN=AFP PE=1 SV=1	AFP	Alpha-fetoprotein	4.893	5.856	5.048	4.974	4.553	5.438	5	6	6	6	4	4	0.277	0.519684
Q15582	Transforming growth factor-beta-induced protein ig-h3 OS=Homo sapiens (Human) OX=9606 GN=TGFBI PE=1 SV=1	TGFBI	Transforming growth factor-beta-induced protein ig-h3	5.318	4.46	7.821	6.75	5.222	1.984	26	23	33	28	28	21	1.214	0.521209
Q5TEC6	Histone H3 OS=Homo sapiens (Human) OX=9606 GN=H3-2 PE=1 SV=1	H3-2	Histone H3	-0.378	-0.066	-0.235	0.105	-3.546	0.173	1	0	1	0	0	1	0.863	0.522143
P19876	C-X-C motif chemokine 3 OS=Homo sapiens (Human) OX=9606 GN=CXCL3 PE=1 SV=1	CXCL3	C-X-C motif chemokine 3	3.701	3.459	3.73	4.186	3.024	4.763	1	1	1	1	1	2	-0.361	0.524246
Q9HB58	Sp110 nuclear body protein OS=Homo sapiens (Human) OX=9606 GN=SP110 PE=1 SV=5	SP110	Sp110 nuclear body protein	-4.733	-3.952	-3.891	-1.815	-4.761	-4.06	0	0	1	1	0	0	-0.646	0.524831
P09914	Interferon-induced protein with tetratricopeptide repeats 1 OS=Homo sapiens (Human) OX=9606 GN=IFIT1 PE=1 SV=2	IFIT1	Interferon-induced protein with tetratricopeptide repeats 1	-4.3	-3.181	-4.454	-1.32	-4.532	-3.89	0	1	2	3	0	1	-0.731	0.528407
Q9HD15	Steroid receptor RNA activator 1 OS=Homo sapiens (Human) OX=9606 GN=SRA1 PE=1 SV=1	SRA1	Steroid receptor RNA activator 1	-1.103	-0.087	-0.553	-0.071	-0.253	-4.407	1	1	1	1	0	0	0.996	0.52874
Q15435	Protein phosphatase 1 regulatory subunit 7 OS=Homo sapiens (Human) OX=9606 GN=PPP1R7 PE=1 SV=1	PPP1R7	Protein phosphatase 1 regulatory subunit 7	-2.273	-2.955	-2.72	-1.491	-5.275	-3.477	2	0	2	4	1	1	0.765	0.528926
Q02790	Peptidyl-prolyl cis-trans isomerase FKBP4 OS=Homo sapiens (Human) OX=9606 GN=FKBP4 PE=1 SV=3	FKBP4	Peptidyl-prolyl cis-trans isomerase FKBP4	-2.805	-3.463	-2.532	-2.031	-4.648	-3.814	6	4	7	8	1	3	0.564	0.529201
Q07021	Complement component 1 Q subcomponent-binding protein, mitochondrial OS=Homo sapiens (Human) OX=9606 GN=C1QBP PE=1 SV=1	C1QBP	Complement component 1 Q subcomponent-binding protein, mitochondrial	-3.922	-5.259	-5.794	-2.135	-4.62	-5.746	0	0	0	2	0	0	-0.825	0.530725
Q9GZM7	Tubulointerstitial nephritis antigen-like OS=Homo sapiens (Human) OX=9606 GN=TINAGL1 PE=1 SV=1	TINAGL1	Tubulointerstitial nephritis antigen-like	-3.214	-2.318	-0.519	-1.189	-3.962	-3.254	1	2	4	4	2	2	0.784	0.532208
O43286	Beta-1,4-galactosyltransferase 5 OS=Homo sapiens (Human) OX=9606 GN=B4GALT5 PE=1 SV=1	B4GALT5	Beta-1,4-galactosyltransferase 5	-0.377	-0.094	1.163	0.918	-0.74	-1.073	2	3	3	3	3	2	0.529	0.533501
Q99615	DnaJ homolog subfamily C member 7 OS=Homo sapiens (Human) OX=9606 GN=DNAJC7 PE=1 SV=2	DNAJC7	DnaJ homolog subfamily C member 7	-2.241	-2.723	-1.027	-0.56	-3.789	-4.203	3	0	2	4	1	1	0.854	0.534314
Q9UJJ9	N-acetylglucosamine-1-phosphotransferase subunit gamma OS=Homo sapiens (Human) OX=9606 GN=GNPTG PE=1 SV=1	GNPTG	N-acetylglucosamine-1-phosphotransferase subunit gamma	0.712	-0.282	1.013	1.622	-2.335	-0.293	3	1	3	3	1	1	0.816	0.53608
Q9BY76	Angiopoietin-related protein 4 OS=Homo sapiens (Human) OX=9606 GN=ANGPTL4 PE=1 SV=2	ANGPTL4	Angiopoietin-related protein 4	-2.477	-1.381	-1.831	-0.609	-2.11	-1.835	1	2	3	3	3	3	-0.379	0.536162
P27635	60S ribosomal protein L10 OS=Homo sapiens (Human) OX=9606 GN=RPL10 PE=1 SV=4	RPL10	60S ribosomal protein L10	-2.646	-3.425	-3.563	-3.08	-5.069	-2.978	1	1	1	1	0	2	0.498	0.537065
P42224	Signal transducer and activator of transcription 1-alpha/beta OS=Homo sapiens (Human) OX=9606 GN=STAT1 PE=1 SV=2	STAT1	Signal transducer and activator of transcription 1-alpha/beta	-3.834	-3.465	-3.25	-0.704	-4.825	-2.593	0	0	0	3	0	1	-0.809	0.538001
Q07065	Cytoskeleton-associated protein 4 OS=Homo sapiens (Human) OX=9606 GN=CKAP4 PE=1 SV=2	CKAP4	Cytoskeleton-associated protein 4	-3.405	-4.425	-3.999	-4.138	-4.084	-2.183	0	1	1	0	1	6	-0.474	0.539299
O75934	Pre-mRNA-splicing factor SPF27 OS=Homo sapiens (Human) OX=9606 GN=BCAS2 PE=1 SV=1	BCAS2	Pre-mRNA-splicing factor SPF27	-3.29	-4.949	-5.137	-2.393	-5.624	-3.058	0	0	0	2	0	0	-0.767	0.540114
P01889	HLA class I histocompatibility antigen, B alpha chain OS=Homo sapiens (Human) OX=9606 GN=HLA-B PE=1 SV=3	HLA-B	HLA class I histocompatibility antigen, B alpha chain	-1.152	2.16	2.587	0.656	-0.494	0.91	1	2	2	1	2	1	0.841	0.540204
P00505	Aspartate aminotransferase, mitochondrial OS=Homo sapiens (Human) OX=9606 GN=GOT2 PE=1 SV=3	GOT2	Aspartate aminotransferase, mitochondrial	-2.799	-2.955	-3.611	-0.726	-4.342	-2.13	2	1	1	4	1	3	-0.722	0.540911
Q99985	Semaphorin-3C OS=Homo sapiens (Human) OX=9606 GN=SEMA3C PE=2 SV=2	SEMA3C	Semaphorin-3C	-0.495	-2.726	-2.104	-1.738	-4.015	-1.619	11	3	4	7	2	8	0.682	0.542025
Q16769	Glutaminyl-peptide cyclotransferase OS=Homo sapiens (Human) OX=9606 GN=QPCT PE=1 SV=1	QPCT	Glutaminyl-peptide cyclotransferase	-3.645	-1.894	-4.402	-3.481	-3.299	-0.98	0	1	1	1	1	1	-0.727	0.543141
Q8NCC3	Group XV phospholipase A2 OS=Homo sapiens (Human) OX=9606 GN=PLA2G15 PE=1 SV=2	PLA2G15	Group XV phospholipase A2	-1.932	-2.101	-0.507	-0.75	-2.829	-2.614	4	4	5	5	4	2	0.551	0.543745
Q01995	Transgelin OS=Homo sapiens (Human) OX=9606 GN=TAGLN PE=1 SV=4	TAGLN	Transgelin	2.117	1.179	2.013	2.547	0.27	1.042	15	10	15	15	13	11	0.483	0.544712
Q06323	Proteasome activator complex subunit 1 OS=Homo sapiens (Human) OX=9606 GN=PSME1 PE=1 SV=1	PSME1	Proteasome activator complex subunit 1	-0.944	-0.373	-0.113	0.678	-4.104	-0.843	2	4	6	6	2	5	0.946	0.544884
P55285	Cadherin-6 OS=Homo sapiens (Human) OX=9606 GN=CDH6 PE=1 SV=1	CDH6	Cadherin-6	-3.562	-3.141	-0.38	-1.691	-4.452	-3.484	3	2	10	9	2	3	0.848	0.545311
P30044	Peroxiredoxin-5, mitochondrial OS=Homo sapiens (Human) OX=9606 GN=PRDX5 PE=1 SV=4	PRDX5	Peroxiredoxin-5, mitochondrial	-1.031	-2.958	-1.918	-1.112	-4.028	-2.761	6	1	5	3	1	3	0.665	0.546841
P50479	PDZ and LIM domain protein 4 OS=Homo sapiens (Human) OX=9606 GN=PDLIM4 PE=1 SV=2	PDLIM4	PDZ and LIM domain protein 4	0.447	-1.77	-0.454	0.182	-4.325	-0.641	7	2	6	6	2	2	1.002	0.54763
Q9HC38	Glyoxalase domain-containing protein 4 OS=Homo sapiens (Human) OX=9606 GN=GLOD4 PE=1 SV=1	GLOD4	Glyoxalase domain-containing protein 4	-2.65	-3.082	-3.309	-1.881	-3.615	-2.473	3	3	3	4	3	4	-0.357	0.547814
O60832	H/ACA ribonucleoprotein complex subunit DKC1 OS=Homo sapiens (Human) OX=9606 GN=DKC1 PE=1 SV=3	DKC1	H/ACA ribonucleoprotein complex subunit DKC1	-3.19	-3.374	-3.306	-3.124	-4.582	-3.125	1	0	1	2	0	1	0.32	0.548472
Q03252	Lamin-B2 OS=Homo sapiens (Human) OX=9606 GN=LMNB2 PE=1 SV=4	LMNB2	Lamin-B2	-3.552	-5.168	-5.138	-3.727	-5.32	-3.178	1	0	0	1	0	1	-0.544	0.550273
Q9Y3D6	Mitochondrial fission 1 protein OS=Homo sapiens (Human) OX=9606 GN=FIS1 PE=1 SV=2	FIS1	Mitochondrial fission 1 protein	-3.407	-4.7	-2.514	-3.913	-4.729	-3.419	1	0	1	1	0	0	0.481	0.551833
Q9H3K6	BolA-like protein 2 OS=Homo sapiens (Human) OX=9606 GN=BOLA2B PE=1 SV=1	BOLA2B	BolA-like protein 2	-0.558	-3.917	-0.945	0.01	-4.707	-4.306	1	1	2	2	0	0	1.194	0.552838
Q14203	Dynactin subunit 1 OS=Homo sapiens (Human) OX=9606 GN=DCTN1 PE=1 SV=3	DCTN1	Dynactin subunit 1	-3.416	-3.809	-2.913	-2.626	-3.99	-4.897	1	0	0	3	0	0	0.459	0.553021
P46937	Transcriptional coactivator YAP1 OS=Homo sapiens (Human) OX=9606 GN=YAP1 PE=1 SV=2	YAP1	Transcriptional coactivator YAP1	-1.66	-2.872	-2.993	-1.314	-3.85	-4.369	1	0	1	2	0	0	0.67	0.553041
P23919	Thymidylate kinase OS=Homo sapiens (Human) OX=9606 GN=DTYMK PE=1 SV=4	DTYMK	Thymidylate kinase	-2.033	-2.411	-2.917	-2.065	-2.379	-4.428	0	1	0	1	0	0	0.504	0.555553
Q8IV08	5'-3' exonuclease PLD3 OS=Homo sapiens (Human) OX=9606 GN=PLD3 PE=1 SV=1	PLD3	5'-3' exonuclease PLD3	-1.773	-1.502	-1.307	-1.404	-4.566	-0.853	2	2	1	3	1	2	0.747	0.556013
P30086	Phosphatidylethanolamine-binding protein 1 OS=Homo sapiens (Human) OX=9606 GN=PEBP1 PE=1 SV=3	PEBP1	Phosphatidylethanolamine-binding protein 1	0.266	-0.623	0.497	0.511	-1.421	-0.214	6	4	5	7	5	5	0.422	0.556839
Q9P232	Contactin-3 OS=Homo sapiens (Human) OX=9606 GN=CNTN3 PE=1 SV=3	CNTN3	Contactin-3	-1.012	-4.73	-5.052	-4.502	-4.952	-3.896	10	0	0	0	0	0	0.852	0.557075
P08473	Neprilysin OS=Homo sapiens (Human) OX=9606 GN=MME PE=1 SV=2	MME	Neprilysin	-3.179	-0.514	-1.273	-1.226	-4.441	-1.741	0	2	1	3	0	0	0.814	0.557331
P02538	Keratin, type II cytoskeletal 6A OS=Homo sapiens (Human) OX=9606 GN=KRT6A PE=1 SV=3	KRT6A	Keratin, type II cytoskeletal 6A	2.583	2.939	5.125	7.236	2.254	4.314	4	3	4	4	4	3	-1.053	0.557932
Q96AY3	Peptidyl-prolyl cis-trans isomerase FKBP10 OS=Homo sapiens (Human) OX=9606 GN=FKBP10 PE=1 SV=1	FKBP10	Peptidyl-prolyl cis-trans isomerase FKBP10	-1.911	-3.099	-1.362	-1.642	-5.292	-1.895	1	1	1	2	0	1	0.819	0.558214
P02545	Prelamin-A/C OS=Homo sapiens (Human) OX=9606 GN=LMNA PE=1 SV=1	LMNA	Prelamin-A/C	0.851	-0.763	-0.335	0.813	-2.428	-0.641	27	14	22	28	14	25	0.67	0.559692
Q13501	Sequestosome-1 OS=Homo sapiens (Human) OX=9606 GN=SQSTM1 PE=1 SV=1	SQSTM1	Sequestosome-1	0.008	-2.957	0.324	0.109	-4.692	-1.391	2	2	2	3	0	1	1.117	0.560606
Q9NQW6	Anillin OS=Homo sapiens (Human) OX=9606 GN=ANLN PE=1 SV=2	ANLN	Anillin	-3.437	-4.575	-4.862	-4.814	-3.955	-5.174	2	0	0	0	0	0	0.356	0.563188
O75718	Cartilage-associated protein OS=Homo sapiens (Human) OX=9606 GN=CRTAP PE=1 SV=1	CRTAP	Cartilage-associated protein	-1.289	-5.034	-5.248	-2.043	-4.589	-2.03	2	0	0	0	0	0	-0.97	0.563468
P04259	Keratin, type II cytoskeletal 6B OS=Homo sapiens (Human) OX=9606 GN=KRT6B PE=1 SV=5	KRT6B	Keratin, type II cytoskeletal 6B	0.255	0.448	3.118	5.924	-0.793	2.728	4	5	5	6	4	5	-1.346	0.564984
Q15063	Periostin OS=Homo sapiens (Human) OX=9606 GN=POSTN PE=1 SV=2	POSTN	Periostin	3.14	-2.238	-1.493	-1.406	-3.207	0.335	30	11	16	19	11	20	1.229	0.566256
P07910	Heterogeneous nuclear ribonucleoproteins C1/C2 OS=Homo sapiens (Human) OX=9606 GN=HNRNPC PE=1 SV=4	HNRNPC	Heterogeneous nuclear ribonucleoproteins C1/C2	-0.362	-2.324	-0.591	-0.082	-4.096	-1.579	6	0	4	6	2	6	0.827	0.56628
P04075	Fructose-bisphosphate aldolase A OS=Homo sapiens (Human) OX=9606 GN=ALDOA PE=1 SV=2	ALDOA	Fructose-bisphosphate aldolase A	-0.142	-1.752	1.19	1.964	-3.452	-2.783	2	2	3	3	0	0	1.189	0.566486
Q9C0C2	182 kDa tankyrase-1-binding protein OS=Homo sapiens (Human) OX=9606 GN=TNKS1BP1 PE=1 SV=4	TNKS1BP1	182 kDa tankyrase-1-binding protein	-2.777	-4.643	-3.115	-2.933	-4.679	-4.397	2	1	2	4	0	1	0.491	0.567072
Q15233	Non-POU domain-containing octamer-binding protein OS=Homo sapiens (Human) OX=9606 GN=NONO PE=1 SV=4	NONO	Non-POU domain-containing octamer-binding protein	-2.239	-3.335	-2.875	-3.038	-4.482	-2.274	8	0	3	5	0	4	0.448	0.567876
Q14764	Major vault protein OS=Homo sapiens (Human) OX=9606 GN=MVP PE=1 SV=4	MVP	Major vault protein	-2.722	-4.265	-4.099	-4.352	-3.701	-0.813	1	0	0	0	1	2	-0.739	0.568785
P09874	Poly [ADP-ribose] polymerase 1 OS=Homo sapiens (Human) OX=9606 GN=PARP1 PE=1 SV=4	PARP1	Poly [ADP-ribose] polymerase 1	-3.447	-4.347	-3.189	-2.756	-4.738	-1.717	2	0	0	2	0	0	-0.59	0.569131
Q6UVK1	Chondroitin sulfate proteoglycan 4 OS=Homo sapiens (Human) OX=9606 GN=CSPG4 PE=1 SV=2	CSPG4	Chondroitin sulfate proteoglycan 4	-0.608	-3.811	-3.866	-3.352	-4.217	-2.848	27	6	2	13	4	13	0.711	0.569482
P30740	Leukocyte elastase inhibitor OS=Homo sapiens (Human) OX=9606 GN=SERPINB1 PE=1 SV=1	SERPINB1	Leukocyte elastase inhibitor	-3.431	-4.858	-3.902	-4.427	-4.697	-0.338	0	0	0	0	0	5	-0.91	0.569892
Q7Z3B1	Neuronal growth regulator 1 OS=Homo sapiens (Human) OX=9606 GN=NEGR1 PE=1 SV=3	NEGR1	Neuronal growth regulator 1	0.126	-2.483	-4.296	-1.089	-4.754	-3.955	3	1	1	1	1	0	1.049	0.570358
Q13332	Receptor-type tyrosine-protein phosphatase S OS=Homo sapiens (Human) OX=9606 GN=PTPRS PE=1 SV=3	PTPRS	Receptor-type tyrosine-protein phosphatase S	-1.785	-3.325	-3.395	-2.675	-5.018	-2.58	4	0	1	3	0	3	0.589	0.570371
P11413	Glucose-6-phosphate 1-dehydrogenase OS=Homo sapiens (Human) OX=9606 GN=G6PD PE=1 SV=4	G6PD	Glucose-6-phosphate 1-dehydrogenase	-1.693	-2.505	-0.789	-0.599	-3.504	-2.692	7	6	12	8	5	6	0.603	0.578077
P01861	Immunoglobulin heavy constant gamma 4 OS=Homo sapiens (Human) OX=9606 GN=IGHG4 PE=1 SV=1	IGHG4	Immunoglobulin heavy constant gamma 4	-2.715	-0.967	-2.91	-1.394	-0.549	-2.952	0	0	1	1	0	0	-0.565	0.578555
O14737	Programmed cell death protein 5 OS=Homo sapiens (Human) OX=9606 GN=PDCD5 PE=1 SV=3	PDCD5	Programmed cell death protein 5	0.302	-3.988	-1.669	-0.559	-4.167	-3.658	4	2	2	3	2	1	1.01	0.579176
P02749	Beta-2-glycoprotein 1 OS=Homo sapiens (Human) OX=9606 GN=APOH PE=1 SV=3	APOH	Beta-2-glycoprotein 1	-0.772	-0.09	-0.762	-0.619	-0.48	-1.03	1	2	1	1	1	1	0.169	0.579387
P61160	Actin-related protein 2 OS=Homo sapiens (Human) OX=9606 GN=ACTR2 PE=1 SV=1	ACTR2	Actin-related protein 2	-2.871	-3.869	-4.441	-1.047	-4.684	-3.358	0	0	0	3	0	1	-0.697	0.579414
P30084	Enoyl-CoA hydratase, mitochondrial OS=Homo sapiens (Human) OX=9606 GN=ECHS1 PE=1 SV=4	ECHS1	Enoyl-CoA hydratase, mitochondrial	-3.863	-1.266	-0.97	-0.884	-3.879	-3.751	0	1	0	1	0	1	0.805	0.580965
Q9NQ88	Fructose-2,6-bisphosphatase TIGAR OS=Homo sapiens (Human) OX=9606 GN=TIGAR PE=1 SV=1	TIGAR	Fructose-2,6-bisphosphatase TIGAR	-3.963	-4.494	-2.252	-1.213	-4.642	-2.693	0	0	1	2	0	1	-0.72	0.581099
P10155	60 kDa SS-A/Ro ribonucleoprotein OS=Homo sapiens (Human) OX=9606 GN=RO60 PE=1 SV=2	RO60	60 kDa SS-A/Ro ribonucleoprotein	-1.957	-3.224	-2.937	-2.052	-4.807	-2.879	2	2	2	3	0	1	0.54	0.581678
O76024	Wolframin OS=Homo sapiens (Human) OX=9606 GN=WFS1 PE=1 SV=2	WFS1	Wolframin	-3.166	-4.505	-4.783	-2.88	-5.427	-2.155	1	0	0	0	0	1	-0.664	0.582188
Q02388	Collagen alpha-1(VII) chain OS=Homo sapiens (Human) OX=9606 GN=COL7A1 PE=1 SV=2	COL7A1	Collagen alpha-1(VII) chain	-3.798	-4.683	-1.943	-3.547	-4.453	-3.936	1	0	10	4	0	0	0.504	0.584439
O75882	Attractin OS=Homo sapiens (Human) OX=9606 GN=ATRN PE=1 SV=2	ATRN	Attractin	-4.073	-4.403	-4.719	-5.046	-5.024	-3.884	1	0	0	0	0	2	0.253	0.585506
P30622	CAP-Gly domain-containing linker protein 1 OS=Homo sapiens (Human) OX=9606 GN=CLIP1 PE=1 SV=2	CLIP1	CAP-Gly domain-containing linker protein 1	-2.635	-3.112	-3.976	-2.687	-4.126	-3.981	3	0	2	3	0	1	0.357	0.585609
Q9Y3A5	Ribosome maturation protein SBDS OS=Homo sapiens (Human) OX=9606 GN=SBDS PE=1 SV=4	SBDS	Ribosome maturation protein SBDS	-1.977	-3.61	-3.622	-3.796	-4.332	-2.465	1	0	0	1	0	1	0.461	0.585732
Q9H2G4	Testis-specific Y-encoded-like protein 2 OS=Homo sapiens (Human) OX=9606 GN=TSPYL2 PE=1 SV=1	TSPYL2	Testis-specific Y-encoded-like protein 2	2.761	4.419	3.057	2.895	4.407	4.16	1	1	1	1	1	1	-0.408	0.587251
P54727	UV excision repair protein RAD23 homolog B OS=Homo sapiens (Human) OX=9606 GN=RAD23B PE=1 SV=1	RAD23B	UV excision repair protein RAD23 homolog B	1.913	1.36	0.164	0.815	-1.92	2.216	3	2	4	4	3	3	0.775	0.588507
Q08752	Peptidyl-prolyl cis-trans isomerase D OS=Homo sapiens (Human) OX=9606 GN=PPID PE=1 SV=3	PPID	Peptidyl-prolyl cis-trans isomerase D	-3.239	-4.319	-3.051	-3.075	-4.699	-3.914	3	1	1	4	1	1	0.36	0.588962
Q99988	Growth/differentiation factor 15 OS=Homo sapiens (Human) OX=9606 GN=GDF15 PE=1 SV=3	GDF15	Growth/differentiation factor 15	-0.852	1.164	1.77	2.497	0.21	1.187	3	6	6	8	6	6	-0.604	0.59015
Q9UNN8	Endothelial protein C receptor OS=Homo sapiens (Human) OX=9606 GN=PROCR PE=1 SV=1	PROCR	Endothelial protein C receptor	-3.37	-0.684	-0.272	-0.685	-2.696	-3.085	0	1	2	1	1	1	0.713	0.591076
A1X283	SH3 and PX domain-containing protein 2B OS=Homo sapiens (Human) OX=9606 GN=SH3PXD2B PE=1 SV=3	SH3PXD2B	SH3 and PX domain-containing protein 2B	-0.755	-5.356	-1.326	-0.874	-4.955	-5.116	0	0	1	1	0	0	1.169	0.591163
Q9Y3E7	Charged multivesicular body protein 3 OS=Homo sapiens (Human) OX=9606 GN=CHMP3 PE=1 SV=3	CHMP3	Charged multivesicular body protein 3	-1.005	-3.297	-2.462	-1.894	-4.359	-2.275	1	0	0	4	1	1	0.588	0.594125
P78371	T-complex protein 1 subunit beta OS=Homo sapiens (Human) OX=9606 GN=CCT2 PE=1 SV=4	CCT2	T-complex protein 1 subunit beta	-2.26	-3.53	-3.024	-1.419	-4.949	-4.461	6	1	6	9	0	2	0.672	0.594726
Q6P587	Acylpyruvase FAHD1, mitochondrial OS=Homo sapiens (Human) OX=9606 GN=FAHD1 PE=1 SV=2	FAHD1	Acylpyruvase FAHD1, mitochondrial	-2.527	-4.664	-4.15	-3.197	-3.875	-3.075	1	0	0	1	0	0	-0.398	0.59534
Q13162	Peroxiredoxin-4 OS=Homo sapiens (Human) OX=9606 GN=PRDX4 PE=1 SV=1	PRDX4	Peroxiredoxin-4	-2.727	-1.149	-1.551	-1.73	-1.219	-4.336	1	2	2	1	1	1	0.619	0.595486
Q9HBR0	Putative sodium-coupled neutral amino acid transporter 10 OS=Homo sapiens (Human) OX=9606 GN=SLC38A10 PE=1 SV=2	SLC38A10	Putative sodium-coupled neutral amino acid transporter 10	-2.552	-3.547	-4.049	-2.926	-3.682	-4.712	2	0	1	1	1	1	0.391	0.595898
P10586	Receptor-type tyrosine-protein phosphatase F OS=Homo sapiens (Human) OX=9606 GN=PTPRF PE=1 SV=2	PTPRF	Receptor-type tyrosine-protein phosphatase F	-1.848	-1.857	-1.802	-0.145	-3.824	-3.584	14	8	8	18	2	2	0.682	0.59694
P11142	Heat shock cognate 71 kDa protein OS=Homo sapiens (Human) OX=9606 GN=HSPA8 PE=1 SV=1	HSPA8	Heat shock cognate 71 kDa protein	2.212	0.952	2.363	2.743	0.414	0.936	19	11	18	20	17	17	0.478	0.598194
P40926	Malate dehydrogenase, mitochondrial OS=Homo sapiens (Human) OX=9606 GN=MDH2 PE=1 SV=3	MDH2	Malate dehydrogenase, mitochondrial	-1.997	-2.877	-1.998	-1.154	-2.655	-2.155	9	2	7	9	7	7	-0.303	0.598488
P49321	Nuclear autoantigenic sperm protein OS=Homo sapiens (Human) OX=9606 GN=NASP PE=1 SV=2	NASP	Nuclear autoantigenic sperm protein	-0.895	-2.713	-2.917	-0.419	-4.417	-4.156	1	0	1	2	0	0	0.822	0.59914
Q8WXF1	Paraspeckle component 1 OS=Homo sapiens (Human) OX=9606 GN=PSPC1 PE=1 SV=1	PSPC1	Paraspeckle component 1	-2.242	-4.362	-4.586	-3.828	-4.78	-3.955	3	0	0	4	0	0	0.458	0.599724
P24592	Insulin-like growth factor-binding protein 6 OS=Homo sapiens (Human) OX=9606 GN=IGFBP6 PE=1 SV=1	IGFBP6	Insulin-like growth factor-binding protein 6	-1.679	-3.363	-3.74	-4.107	-1.24	-1.544	2	0	1	1	2	2	-0.63	0.599824
P78539	Sushi repeat-containing protein SRPX OS=Homo sapiens (Human) OX=9606 GN=SRPX PE=1 SV=1	SRPX	Sushi repeat-containing protein SRPX	-1.045	-2.467	-2.285	-1.803	-2.26	-2.59	7	5	7	6	7	4	0.285	0.599848
Q02241	Kinesin-like protein KIF23 OS=Homo sapiens (Human) OX=9606 GN=KIF23 PE=1 SV=3	KIF23	Kinesin-like protein KIF23	-1.219	-3.977	-5.088	-4.878	-3.549	-3.92	2	0	0	0	0	0	0.688	0.601682
O00499	Myc box-dependent-interacting protein 1 OS=Homo sapiens (Human) OX=9606 GN=BIN1 PE=1 SV=1	BIN1	Myc box-dependent-interacting protein 1	-2.052	-3.907	-2.967	-1.499	-5.212	-4.315	2	0	1	4	0	0	0.699	0.602838
P01040	Cystatin-A OS=Homo sapiens (Human) OX=9606 GN=CSTA PE=1 SV=1	CSTA	Cystatin-A	-1.659	-1.051	-1.23	-0.235	-3.146	1.868	2	3	3	3	2	4	-0.809	0.610097
P08294	Extracellular superoxide dismutase [Cu-Zn] OS=Homo sapiens (Human) OX=9606 GN=SOD3 PE=1 SV=2	SOD3	Extracellular superoxide dismutase [Cu-Zn]	-3.863	-4.007	-3.36	-4.19	-4.516	-0.205	0	0	0	0	0	3	-0.773	0.610273
P09668	Pro-cathepsin H OS=Homo sapiens (Human) OX=9606 GN=CTSH PE=1 SV=4	CTSH	Pro-cathepsin H	0.534	-0.127	-1.536	-0.209	-4.139	0.601	0	0	1	1	0	1	0.873	0.61116
Q9BXF6	Rab11 family-interacting protein 5 OS=Homo sapiens (Human) OX=9606 GN=RAB11FIP5 PE=1 SV=1	RAB11FIP5	Rab11 family-interacting protein 5	-1.646	-6.123	-2.823	-2.866	-5.43	-4.85	1	0	1	1	0	0	0.851	0.611812
O94903	Pyridoxal phosphate homeostasis protein OS=Homo sapiens (Human) OX=9606 GN=PLPBP PE=1 SV=1	PLPBP	Pyridoxal phosphate homeostasis protein	-1.387	-1.546	-1.494	-0.122	-5.66	-1.399	2	0	2	2	0	1	0.918	0.612913
Q92520	Protein FAM3C OS=Homo sapiens (Human) OX=9606 GN=FAM3C PE=1 SV=1	FAM3C	Protein FAM3C	-1.867	-3.359	-2.678	-2.717	-3.516	-2.535	8	4	5	6	5	7	0.288	0.61305
P29373	Cellular retinoic acid-binding protein 2 OS=Homo sapiens (Human) OX=9606 GN=CRABP2 PE=1 SV=2	CRABP2	Cellular retinoic acid-binding protein 2	-2.744	-4.776	-3.115	-1.096	-4.479	-3.146	1	0	0	1	0	0	-0.638	0.613168
Q00341	Vigilin OS=Homo sapiens (Human) OX=9606 GN=HDLBP PE=1 SV=2	HDLBP	Vigilin	-2.354	-3.954	-2.845	-2.256	-4.266	-3.907	7	0	2	8	0	2	0.425	0.613989
Q8NHP8	Putative phospholipase B-like 2 OS=Homo sapiens (Human) OX=9606 GN=PLBD2 PE=1 SV=2	PLBD2	Putative phospholipase B-like 2	-3.6	-4.855	-2.593	-3.702	-4.261	-4.19	1	0	4	3	1	2	0.368	0.615491
P50395	Rab GDP dissociation inhibitor beta OS=Homo sapiens (Human) OX=9606 GN=GDI2 PE=1 SV=2	GDI2	Rab GDP dissociation inhibitor beta	-1.522	-2.985	-2.653	-1.48	-3.382	-3.596	6	2	3	7	2	2	0.432	0.619722
Q9Y678	Coatomer subunit gamma-1 OS=Homo sapiens (Human) OX=9606 GN=COPG1 PE=1 SV=1	COPG1	Coatomer subunit gamma-1	-2.663	-3.587	-3.143	-2.503	-3.395	-4.531	1	0	0	2	1	0	0.345	0.620715
Q9HAV7	GrpE protein homolog 1, mitochondrial OS=Homo sapiens (Human) OX=9606 GN=GRPEL1 PE=1 SV=2	GRPEL1	GrpE protein homolog 1, mitochondrial	-2.479	-2.867	-2.925	-1.511	-4.662	-3.599	0	0	1	1	0	1	0.501	0.621163
Q8WVQ1	Soluble calcium-activated nucleotidase 1 OS=Homo sapiens (Human) OX=9606 GN=CANT1 PE=1 SV=1	CANT1	Soluble calcium-activated nucleotidase 1	-4.109	-2.478	-3.106	-2.44	-4.49	-4.01	1	3	3	5	1	1	0.415	0.622557
P09919	Granulocyte colony-stimulating factor OS=Homo sapiens (Human) OX=9606 GN=CSF3 PE=1 SV=1	CSF3	Granulocyte colony-stimulating factor	-2.273	-1.637	-2.01	-1.278	-3.467	0.825	0	1	1	1	1	2	-0.667	0.622798
Q86VZ4	Low-density lipoprotein receptor-related protein 11 OS=Homo sapiens (Human) OX=9606 GN=LRP11 PE=2 SV=2	LRP11	Low-density lipoprotein receptor-related protein 11	0.222	-3.853	-2.547	-2.714	-1.992	-3.508	1	0	0	1	0	0	0.679	0.623393
Q8N8S7	Protein enabled homolog OS=Homo sapiens (Human) OX=9606 GN=ENAH PE=1 SV=2	ENAH	Protein enabled homolog	-0.401	-2.963	-2.356	-1.203	-3.643	-2.539	2	0	1	1	0	0	0.555	0.623764
P35754	Glutaredoxin-1 OS=Homo sapiens (Human) OX=9606 GN=GLRX PE=1 SV=2	GLRX	Glutaredoxin-1	-2.641	-4.529	-3.904	-3.664	-3.604	-2.824	0	1	1	1	1	2	-0.327	0.624167
P69905	Hemoglobin subunit alpha OS=Homo sapiens (Human) OX=9606 GN=HBA2 PE=1 SV=2	HBA2	Hemoglobin subunit alpha	9.131	9.131	9.948	9.728	7.552	9.706	7	6	7	6	6	7	0.408	0.62452
Q86Y82	Syntaxin-12 OS=Homo sapiens (Human) OX=9606 GN=STX12 PE=1 SV=1	STX12	Syntaxin-12	-2.822	-3.829	-1.366	-1.589	-4.195	-3.978	3	1	6	6	2	1	0.582	0.624764
Q9P121	Neurotrimin OS=Homo sapiens (Human) OX=9606 GN=NTM PE=1 SV=1	NTM	Neurotrimin	-2.616	-3.196	-4.501	-3.529	-4.371	-3.416	1	1	1	2	2	0	0.334	0.626002
Q9BZM4	UL16-binding protein 3 OS=Homo sapiens (Human) OX=9606 GN=ULBP3 PE=1 SV=1	ULBP3	UL16-binding protein 3	-1.309	-3.138	-4.775	0.309	-5.53	-0.752	2	1	0	2	0	3	-1.083	0.626209
Q9BWS9	Chitinase domain-containing protein 1 OS=Homo sapiens (Human) OX=9606 GN=CHID1 PE=1 SV=1	CHID1	Chitinase domain-containing protein 1	-3.143	-5.553	-3.894	-3.557	-4.919	-2.552	0	0	0	1	0	1	-0.521	0.626253
P35237	Serpin B6 OS=Homo sapiens (Human) OX=9606 GN=SERPINB6 PE=1 SV=3	SERPINB6	Serpin B6	-3.38	-2.841	-2.155	-2.877	-2.675	-3.512	0	1	1	1	0	0	0.229	0.626308
P43034	Platelet-activating factor acetylhydrolase IB subunit alpha OS=Homo sapiens (Human) OX=9606 GN=PAFAH1B1 PE=1 SV=2	PAFAH1B1	Platelet-activating factor acetylhydrolase IB subunit alpha	-1.893	-3.374	-2.787	-0.827	-5.485	-4.018	3	1	2	5	1	0	0.758	0.626505
P62942	Peptidyl-prolyl cis-trans isomerase FKBP1A OS=Homo sapiens (Human) OX=9606 GN=FKBP1A PE=1 SV=2	FKBP1A	Peptidyl-prolyl cis-trans isomerase FKBP1A	-1.783	-3.355	-1.62	-0.612	-4.519	-3.681	4	2	3	5	1	2	0.684	0.629021
Q96IZ0	PRKC apoptosis WT1 regulator protein OS=Homo sapiens (Human) OX=9606 GN=PAWR PE=1 SV=1	PAWR	PRKC apoptosis WT1 regulator protein	-3.841	-3.059	-3.771	-3.931	-4.307	-3.109	1	0	1	1	0	0	0.226	0.629868
Q9BQ61	Telomerase RNA component interacting RNase OS=Homo sapiens (Human) OX=9606 GN=TRIR PE=1 SV=1	TRIR	Telomerase RNA component interacting RNase	-3.311	-4.009	-3.296	-2.953	-5.018	-3.659	1	1	0	1	0	0	0.339	0.629988
P06280	Alpha-galactosidase A OS=Homo sapiens (Human) OX=9606 GN=GLA PE=1 SV=1	GLA	Alpha-galactosidase A	-1.944	-3.538	-1.941	-0.725	-4.174	-4.594	4	2	5	6	2	2	0.69	0.632835
Q9BZM5	UL16-binding protein 2 OS=Homo sapiens (Human) OX=9606 GN=ULBP2 PE=1 SV=1	ULBP2	UL16-binding protein 2	3.704	3.342	3.658	4.494	1.726	3.238	3	4	3	4	4	4	0.416	0.633968
Q9Y3F4	Serine-threonine kinase receptor-associated protein OS=Homo sapiens (Human) OX=9606 GN=STRAP PE=1 SV=1	STRAP	Serine-threonine kinase receptor-associated protein	-2.453	-3.759	-2.028	-1.019	-4.518	-4.715	5	1	4	7	0	2	0.671	0.635176
P12277	Creatine kinase B-type OS=Homo sapiens (Human) OX=9606 GN=CKB PE=1 SV=1	CKB	Creatine kinase B-type	-4.054	-3.997	-4.532	-3.994	-5.016	-2.359	2	2	3	3	1	5	-0.404	0.636736
P32455	Guanylate-binding protein 1 OS=Homo sapiens (Human) OX=9606 GN=GBP1 PE=1 SV=2	GBP1	Guanylate-binding protein 1	-1.724	-1.855	-0.15	-0.36	-2.783	-1.96	2	3	4	4	3	0	0.458	0.636984
Q9UJU6	Drebrin-like protein OS=Homo sapiens (Human) OX=9606 GN=DBNL PE=1 SV=1	DBNL	Drebrin-like protein	-2.107	-3.971	-3.518	-2.065	-4.983	-4.124	1	0	1	5	0	0	0.525	0.637573
Q86YZ3	Hornerin OS=Homo sapiens (Human) OX=9606 GN=HRNR PE=1 SV=2	HRNR	Hornerin	-3.314	-1.895	-2.666	-2.219	-4.033	-2.664	2	4	4	4	3	4	0.347	0.637969
Q9UGM3	Deleted in malignant brain tumors 1 protein OS=Homo sapiens (Human) OX=9606 GN=DMBT1 PE=1 SV=2	DMBT1	Deleted in malignant brain tumors 1 protein	-3.128	-3.788	-4.108	-4.562	-3.989	-0.496	1	1	0	1	1	4	-0.659	0.639513
P58215	Lysyl oxidase homolog 3 OS=Homo sapiens (Human) OX=9606 GN=LOXL3 PE=1 SV=1	LOXL3	Lysyl oxidase homolog 3	-3.609	-4.328	-3.001	-3.02	-4.19	-4.674	1	0	1	0	0	0	0.315	0.639647
Q92499	ATP-dependent RNA helicase DDX1 OS=Homo sapiens (Human) OX=9606 GN=DDX1 PE=1 SV=2	DDX1	ATP-dependent RNA helicase DDX1	-2.739	-3.902	-2.88	-2.706	-4.094	-3.547	5	0	7	5	3	3	0.275	0.640398
P23280	Carbonic anhydrase 6 OS=Homo sapiens (Human) OX=9606 GN=CA6 PE=1 SV=3	CA6	Carbonic anhydrase 6	-2.173	-3.127	-3.091	-1.904	-5.349	2.174	0	0	0	1	0	4	-1.105	0.641488
Q86UD1	Out at first protein homolog OS=Homo sapiens (Human) OX=9606 GN=OAF PE=2 SV=1	OAF	Out at first protein homolog	-0.149	-0.332	1.791	1.248	-0.875	-0.476	2	3	5	4	2	3	0.471	0.642737
Q8WUM4	Programmed cell death 6-interacting protein OS=Homo sapiens (Human) OX=9606 GN=PDCD6IP PE=1 SV=1	PDCD6IP	Programmed cell death 6-interacting protein	-2.338	-3.669	-3.266	-2.522	-4.446	-3.331	7	0	5	9	1	1	0.342	0.642896
Q96QA5	Gasdermin-A OS=Homo sapiens (Human) OX=9606 GN=GSDMA PE=1 SV=4	GSDMA	Gasdermin-A	-2.277	-3.698	-1.232	-2.156	-3.053	-3.172	2	1	2	1	1	1	0.391	0.643534
P43121	Cell surface glycoprotein MUC18 OS=Homo sapiens (Human) OX=9606 GN=MCAM PE=1 SV=2	MCAM	Cell surface glycoprotein MUC18	-3.242	-4.325	-4.518	-4.44	-4.389	-1.839	2	0	0	0	0	3	-0.472	0.643841
P08238	Heat shock protein HSP 90-beta OS=Homo sapiens (Human) OX=9606 GN=HSP90AB1 PE=1 SV=4	HSP90AB1	Heat shock protein HSP 90-beta	-0.471	-3.16	-0.355	0.374	-4.4	-2.446	9	3	9	9	3	4	0.829	0.643854
Q5F1R6	DnaJ homolog subfamily C member 21 OS=Homo sapiens (Human) OX=9606 GN=DNAJC21 PE=1 SV=2	DNAJC21	DnaJ homolog subfamily C member 21	-3.043	-5.091	-3.536	-2.635	-5.99	-4.779	0	0	1	2	0	0	0.578	0.644145
Q13740	CD166 antigen OS=Homo sapiens (Human) OX=9606 GN=ALCAM PE=1 SV=2	ALCAM	CD166 antigen	0.946	0.106	-0.643	0.086	1.434	-0.115	5	5	5	6	6	5	-0.332	0.645768
P12956	X-ray repair cross-complementing protein 6 OS=Homo sapiens (Human) OX=9606 GN=XRCC6 PE=1 SV=2	XRCC6	X-ray repair cross-complementing protein 6	-2.462	-4.152	-4.19	-2.811	-3.473	-3.6	5	0	0	2	0	1	-0.306	0.647004
Q9Y2W1	Thyroid hormone receptor-associated protein 3 OS=Homo sapiens (Human) OX=9606 GN=THRAP3 PE=1 SV=2	THRAP3	Thyroid hormone receptor-associated protein 3	-4.944	-4.535	-2.342	-3.837	-3.651	-3.09	0	1	1	1	0	0	-0.414	0.647041
O75063	Glycosaminoglycan xylosylkinase OS=Homo sapiens (Human) OX=9606 GN=FAM20B PE=1 SV=1	FAM20B	Glycosaminoglycan xylosylkinase	-3.509	-4.113	-3.363	-2.03	-4.306	-3.603	0	0	2	3	1	1	-0.349	0.64925
O43175	D-3-phosphoglycerate dehydrogenase OS=Homo sapiens (Human) OX=9606 GN=PHGDH PE=1 SV=4	PHGDH	D-3-phosphoglycerate dehydrogenase	-2.397	-2.532	-1.186	-0.262	-3.792	-3.922	6	3	3	7	3	3	0.62	0.651483
P50452	Serpin B8 OS=Homo sapiens (Human) OX=9606 GN=SERPINB8 PE=1 SV=2	SERPINB8	Serpin B8	-1.789	-3.168	-3.837	-2.62	-3.973	-3.249	6	1	4	4	0	1	0.349	0.652332
Q96QV1	Hedgehog-interacting protein OS=Homo sapiens (Human) OX=9606 GN=HHIP PE=1 SV=3	HHIP	Hedgehog-interacting protein	-0.889	-4.253	-4.229	-1.628	-5.475	-4.622	9	0	0	8	0	0	0.785	0.65261
Q07866	Kinesin light chain 1 OS=Homo sapiens (Human) OX=9606 GN=KLC1 PE=1 SV=2	KLC1	Kinesin light chain 1	-3.306	-2.533	-2.53	-1.673	-4.331	-3.575	2	0	4	5	0	0	0.403	0.653376
Q9BS26	Endoplasmic reticulum resident protein 44 OS=Homo sapiens (Human) OX=9606 GN=ERP44 PE=1 SV=1	ERP44	Endoplasmic reticulum resident protein 44	-2.3	-2.471	-2.598	-2.156	-3.302	-0.9	5	4	5	5	2	5	-0.337	0.654466
O60568	Multifunctional procollagen lysine hydroxylase and glycosyltransferase LH3 OS=Homo sapiens (Human) OX=9606 GN=PLOD3 PE=1 SV=1	PLOD3	Multifunctional procollagen lysine hydroxylase and glycosyltransferase LH3	-1.094	-3.549	-2.829	-1.498	-3.769	-3.717	11	1	2	9	4	2	0.504	0.654502
Q14588	Zinc finger protein 234 OS=Homo sapiens (Human) OX=9606 GN=ZNF234 PE=2 SV=3	ZNF234	Zinc finger protein 234	-3.106	-0.628	-1.38	-3.311	-1.6	2.516	0	0	1	0	0	1	-0.906	0.654686
P37108	Signal recognition particle 14 kDa protein OS=Homo sapiens (Human) OX=9606 GN=SRP14 PE=1 SV=2	SRP14	Signal recognition particle 14 kDa protein	-0.769	-2.204	-2.159	-0.67	-5.523	-1.249	0	0	1	1	0	1	0.77	0.655812
P01042	Kininogen-1 OS=Homo sapiens (Human) OX=9606 GN=KNG1 PE=1 SV=2	KNG1	Kininogen-1	2.167	-3.693	3.832	4.037	-1.642	4.187	0	0	1	1	0	1	-1.425	0.657552
O60701	UDP-glucose 6-dehydrogenase OS=Homo sapiens (Human) OX=9606 GN=UGDH PE=1 SV=1	UGDH	UDP-glucose 6-dehydrogenase	-1.3	-3.749	-1.51	-1.35	-3.053	-3.634	3	3	4	5	2	2	0.493	0.660581
Q13405	39S ribosomal protein L49, mitochondrial OS=Homo sapiens (Human) OX=9606 GN=MRPL49 PE=1 SV=1	MRPL49	39S ribosomal protein L49, mitochondrial	-3.805	-4.43	-4.397	-2.313	-4.528	-4.67	1	0	0	2	0	0	-0.374	0.660768
P17813	Endoglin OS=Homo sapiens (Human) OX=9606 GN=ENG PE=1 SV=2	ENG	Endoglin	-0.9	-0.121	0.423	1.096	-1.528	-1.508	3	4	4	4	4	3	0.447	0.662893
Q9H6X2	Anthrax toxin receptor 1 OS=Homo sapiens (Human) OX=9606 GN=ANTXR1 PE=1 SV=2	ANTXR1	Anthrax toxin receptor 1	-2.308	-2.651	-2.82	-2.71	-2.976	-1.356	1	0	2	2	2	1	-0.246	0.662893
O43237	Cytoplasmic dynein 1 light intermediate chain 2 OS=Homo sapiens (Human) OX=9606 GN=DYNC1LI2 PE=1 SV=1	DYNC1LI2	Cytoplasmic dynein 1 light intermediate chain 2	-2.299	-2.305	-1.885	-1.213	-4.037	-2.409	1	1	2	2	1	0	0.39	0.662895
P18669	Phosphoglycerate mutase 1 OS=Homo sapiens (Human) OX=9606 GN=PGAM1 PE=1 SV=2	PGAM1	Phosphoglycerate mutase 1	-0.306	-2.803	-1.923	-0.548	-2.988	-3.033	5	2	4	5	2	1	0.513	0.6652
O14964	Hepatocyte growth factor-regulated tyrosine kinase substrate OS=Homo sapiens (Human) OX=9606 GN=HGS PE=1 SV=1	HGS	Hepatocyte growth factor-regulated tyrosine kinase substrate	-2.513	-4.536	-4	-2.941	-4.375	-2.598	1	1	1	2	0	2	-0.379	0.666029
P17936	Insulin-like growth factor-binding protein 3 OS=Homo sapiens (Human) OX=9606 GN=IGFBP3 PE=1 SV=2	IGFBP3	Insulin-like growth factor-binding protein 3	-1.04	-3.409	-2.433	-2.819	-2.62	0.23	5	3	4	3	7	11	-0.557	0.666653
O00139	Kinesin-like protein KIF2A OS=Homo sapiens (Human) OX=9606 GN=KIF2A PE=1 SV=3	KIF2A	Kinesin-like protein KIF2A	-2.772	-4.135	-5.372	-3.683	-5.056	-4.731	1	0	0	1	0	0	0.397	0.667277
O95834	Echinoderm microtubule-associated protein-like 2 OS=Homo sapiens (Human) OX=9606 GN=EML2 PE=1 SV=1	EML2	Echinoderm microtubule-associated protein-like 2	-3.55	-3.926	-2.721	-1.689	-3.877	-3.566	1	0	2	3	0	0	-0.355	0.669071
P55072	Transitional endoplasmic reticulum ATPase OS=Homo sapiens (Human) OX=9606 GN=VCP PE=1 SV=4	VCP	Transitional endoplasmic reticulum ATPase	-1.142	-2.874	-0.478	-0.588	-3.269	-2.094	20	7	21	24	11	14	0.486	0.669095
P40925	Malate dehydrogenase, cytoplasmic OS=Homo sapiens (Human) OX=9606 GN=MDH1 PE=1 SV=4	MDH1	Malate dehydrogenase, cytoplasmic	-1.095	-2.724	-1.63	-1.051	-3.786	-1.906	7	4	7	9	3	7	0.431	0.669921
P24593	Insulin-like growth factor-binding protein 5 OS=Homo sapiens (Human) OX=9606 GN=IGFBP5 PE=1 SV=1	IGFBP5	Insulin-like growth factor-binding protein 5	1.043	0.071	2.836	3.317	-1.195	4.451	8	6	11	10	8	17	-0.874	0.670068
Q96K17	Transcription factor BTF3 homolog 4 OS=Homo sapiens (Human) OX=9606 GN=BTF3L4 PE=1 SV=1	BTF3L4	Transcription factor BTF3 homolog 4	-2.812	-3.886	-4.667	-1.231	-4.226	-4.334	1	0	1	3	0	0	-0.524	0.672103
Q6IQ49	Replication stress response regulator SDE2 OS=Homo sapiens (Human) OX=9606 GN=SDE2 PE=1 SV=1	SDE2	Replication stress response regulator SDE2	-5.497	-4.104	-3.682	-3.266	-3.869	-5.098	1	0	0	2	0	0	-0.35	0.672367
P00441	Superoxide dismutase [Cu-Zn] OS=Homo sapiens (Human) OX=9606 GN=SOD1 PE=1 SV=2	SOD1	Superoxide dismutase [Cu-Zn]	-2.32	-0.45	-1.047	-3.638	-2.255	0.323	1	1	2	1	1	2	0.585	0.672723
Q16643	Drebrin OS=Homo sapiens (Human) OX=9606 GN=DBN1 PE=1 SV=4	DBN1	Drebrin	-0.254	-4.218	-0.791	-0.712	-4.769	-2.129	4	1	3	4	1	2	0.782	0.672736
Q14574	Desmocollin-3 OS=Homo sapiens (Human) OX=9606 GN=DSC3 PE=1 SV=3	DSC3	Desmocollin-3	-3.249	-2.328	-1.441	-0.856	-3.786	-3.909	0	2	3	4	0	1	0.511	0.673231
P45974	Ubiquitin carboxyl-terminal hydrolase 5 OS=Homo sapiens (Human) OX=9606 GN=USP5 PE=1 SV=2	USP5	Ubiquitin carboxyl-terminal hydrolase 5	-2.461	-3.659	-2.179	-1.677	-3.922	-3.861	6	4	7	8	2	2	0.387	0.678266
P36969	Phospholipid hydroperoxide glutathione peroxidase OS=Homo sapiens (Human) OX=9606 GN=GPX4 PE=1 SV=3	GPX4	Phospholipid hydroperoxide glutathione peroxidase	-4.355	-3.977	-1.4	-0.656	-2.911	-4.282	0	0	1	2	0	0	-0.628	0.678505
Q96AG4	Leucine-rich repeat-containing protein 59 OS=Homo sapiens (Human) OX=9606 GN=LRRC59 PE=1 SV=1	LRRC59	Leucine-rich repeat-containing protein 59	-1.963	-3.037	-1.897	-0.632	-4.717	-3.219	2	1	3	4	1	2	0.557	0.67885
Q8N8Z6	Discoidin, CUB and LCCL domain-containing protein 1 OS=Homo sapiens (Human) OX=9606 GN=DCBLD1 PE=1 SV=2	DCBLD1	Discoidin, CUB and LCCL domain-containing protein 1	-3.449	-2.721	-3.343	-2.948	-3.545	-2.522	2	2	2	3	1	1	-0.166	0.679622
O14974	Protein phosphatase 1 regulatory subunit 12A OS=Homo sapiens (Human) OX=9606 GN=PPP1R12A PE=1 SV=1	PPP1R12A	Protein phosphatase 1 regulatory subunit 12A	-1.724	-3.063	-3.832	-1.358	-4.269	-4.587	2	1	1	2	0	0	0.531	0.680178
Q08380	Galectin-3-binding protein OS=Homo sapiens (Human) OX=9606 GN=LGALS3BP PE=1 SV=1	LGALS3BP	Galectin-3-binding protein	-3.008	0.891	0.981	1.373	-0.303	-0.31	2	8	10	10	9	6	-0.632	0.681093
Q9UNW1	Multiple inositol polyphosphate phosphatase 1 OS=Homo sapiens (Human) OX=9606 GN=MINPP1 PE=1 SV=1	MINPP1	Multiple inositol polyphosphate phosphatase 1	-2.531	-2.163	-1.52	-1.826	-2.587	-2.29	6	6	9	9	8	8	0.163	0.681239
P16278	Beta-galactosidase OS=Homo sapiens (Human) OX=9606 GN=GLB1 PE=1 SV=2	GLB1	Beta-galactosidase	-2.173	-2.995	-0.763	-0.688	-3.55	-3.161	4	1	6	6	2	1	0.489	0.68174
Q15691	Microtubule-associated protein RP/EB family member 1 OS=Homo sapiens (Human) OX=9606 GN=MAPRE1 PE=1 SV=3	MAPRE1	Microtubule-associated protein RP/EB family member 1	0.244	-3.583	-3.254	-1.055	-2.654	-1.132	3	1	3	3	2	2	-0.584	0.683272
Q7Z417	Nuclear fragile X mental retardation-interacting protein 2 OS=Homo sapiens (Human) OX=9606 GN=NUFIP2 PE=1 SV=1	NUFIP2	Nuclear fragile X mental retardation-interacting protein 2	-3.397	-5.458	-3.962	-3.791	-3.452	-4.65	0	0	1	2	0	0	-0.308	0.686646
P05362	Intercellular adhesion molecule 1 OS=Homo sapiens (Human) OX=9606 GN=ICAM1 PE=1 SV=2	ICAM1	Intercellular adhesion molecule 1	-1.774	-2.89	-2.95	-2.629	-3.653	-2.103	3	1	2	3	2	5	0.257	0.687875
P13747	HLA class I histocompatibility antigen, alpha chain E OS=Homo sapiens (Human) OX=9606 GN=HLA-E PE=1 SV=4	HLA-E	HLA class I histocompatibility antigen, alpha chain E	-1.632	-1.162	-1.092	-1.708	-3.289	-0.1	3	3	4	4	2	3	0.404	0.688516
P35221	Catenin alpha-1 OS=Homo sapiens (Human) OX=9606 GN=CTNNA1 PE=1 SV=1	CTNNA1	Catenin alpha-1	-2.233	-2.616	-1.948	-0.731	-3.854	-3.498	17	16	20	26	8	5	0.429	0.691871
P34059	N-acetylgalactosamine-6-sulfatase OS=Homo sapiens (Human) OX=9606 GN=GALNS PE=1 SV=1	GALNS	N-acetylgalactosamine-6-sulfatase	-4.142	-4.192	-2.89	-2.989	-4.068	-3.494	1	0	2	3	1	0	-0.225	0.692331
Q68BL7	Olfactomedin-like protein 2A OS=Homo sapiens (Human) OX=9606 GN=OLFML2A PE=2 SV=1	OLFML2A	Olfactomedin-like protein 2A	-3.617	-2.093	-2.859	-1.374	-5.149	-3.545	1	1	1	3	0	1	0.499	0.693658
Q92598	Heat shock protein 105 kDa OS=Homo sapiens (Human) OX=9606 GN=HSPH1 PE=1 SV=1	HSPH1	Heat shock protein 105 kDa	-1.157	-3.204	-1.568	-0.382	-4.238	-2.947	10	3	7	10	1	4	0.546	0.694753
Q6P5S2	Protein LEG1 homolog OS=Homo sapiens (Human) OX=9606 GN=LEG1 PE=1 SV=2	LEG1	Protein LEG1 homolog	-4.309	-4.71	-2.538	-4.886	-4.836	0.628	0	0	0	0	0	2	-0.821	0.695058
Q08431	Lactadherin OS=Homo sapiens (Human) OX=9606 GN=MFGE8 PE=1 SV=3	MFGE8	Lactadherin	-1.97	-5.43	-1.592	-3.335	-3.743	-3.467	2	1	4	3	2	4	0.517	0.695071
Q99614	Tetratricopeptide repeat protein 1 OS=Homo sapiens (Human) OX=9606 GN=TTC1 PE=1 SV=1	TTC1	Tetratricopeptide repeat protein 1	-3.174	-3.522	-4.6	-2.266	-4.433	-3.632	1	0	0	2	0	0	-0.322	0.695302
P15374	Ubiquitin carboxyl-terminal hydrolase isozyme L3 OS=Homo sapiens (Human) OX=9606 GN=UCHL3 PE=1 SV=1	UCHL3	Ubiquitin carboxyl-terminal hydrolase isozyme L3	-5.054	-3.179	-2.133	-2.56	-1.401	-4.759	0	1	2	1	0	0	-0.549	0.695579
Q9BV57	1,2-dihydroxy-3-keto-5-methylthiopentene dioxygenase OS=Homo sapiens (Human) OX=9606 GN=ADI1 PE=1 SV=1	ADI1	1,2-dihydroxy-3-keto-5-methylthiopentene dioxygenase	-3.104	-3.066	-3.82	-0.694	-3.467	-4.395	2	1	2	5	1	0	-0.478	0.696198
P09936	Ubiquitin carboxyl-terminal hydrolase isozyme L1 OS=Homo sapiens (Human) OX=9606 GN=UCHL1 PE=1 SV=2	UCHL1	Ubiquitin carboxyl-terminal hydrolase isozyme L1	0.529	-1.42	-0.017	0.369	-0.652	0.204	8	5	9	7	7	7	-0.276	0.697383
P49368	T-complex protein 1 subunit gamma OS=Homo sapiens (Human) OX=9606 GN=CCT3 PE=1 SV=4	CCT3	T-complex protein 1 subunit gamma	-2.854	-2.715	-2.866	-1.365	-4.455	-3.79	3	2	3	6	1	1	0.392	0.698325
Q02809	Procollagen-lysine,2-oxoglutarate 5-dioxygenase 1 OS=Homo sapiens (Human) OX=9606 GN=PLOD1 PE=1 SV=2	PLOD1	Procollagen-lysine,2-oxoglutarate 5-dioxygenase 1	-1.579	-2.491	-1.524	-1.063	-2.843	-2.466	16	13	16	19	10	11	0.259	0.69972
P14866	Heterogeneous nuclear ribonucleoprotein L OS=Homo sapiens (Human) OX=9606 GN=HNRNPL PE=1 SV=2	HNRNPL	Heterogeneous nuclear ribonucleoprotein L	-1.788	-4.895	-2.757	-2.277	-4.133	-1.538	4	1	4	3	2	3	-0.497	0.699982
O95817	BAG family molecular chaperone regulator 3 OS=Homo sapiens (Human) OX=9606 GN=BAG3 PE=1 SV=3	BAG3	BAG family molecular chaperone regulator 3	-2.982	-2.137	-1.653	-0.903	-3.436	-3.622	4	3	3	5	2	2	0.397	0.700378
Q13835	Plakophilin-1 OS=Homo sapiens (Human) OX=9606 GN=PKP1 PE=1 SV=2	PKP1	Plakophilin-1	-3.584	-3.066	-2.84	-1.091	-4.16	-3.09	2	4	4	11	4	6	-0.382	0.700797
P52294	Importin subunit alpha-5 OS=Homo sapiens (Human) OX=9606 GN=KPNA1 PE=1 SV=3	KPNA1	Importin subunit alpha-5	-5.565	-3.413	-4.69	-1.021	-4.68	-5.976	0	0	0	2	0	0	-0.663	0.701453
P16035	Metalloproteinase inhibitor 2 OS=Homo sapiens (Human) OX=9606 GN=TIMP2 PE=1 SV=2	TIMP2	Metalloproteinase inhibitor 2	2.151	2.317	2.435	2.216	2.054	3.012	5	5	6	4	6	5	-0.126	0.702952
P06865	Beta-hexosaminidase subunit alpha OS=Homo sapiens (Human) OX=9606 GN=HEXA PE=1 SV=2	HEXA	Beta-hexosaminidase subunit alpha	-2.265	-1.785	-2.211	-1.122	-3.594	-2.443	0	0	2	3	0	0	0.299	0.703103
Q13596	Sorting nexin-1 OS=Homo sapiens (Human) OX=9606 GN=SNX1 PE=1 SV=3	SNX1	Sorting nexin-1	-1.817	-3.469	-1.612	-1.407	-3.641	-2.93	1	0	1	2	1	1	0.36	0.704287
P08670	Vimentin OS=Homo sapiens (Human) OX=9606 GN=VIM PE=1 SV=4	VIM	Vimentin	1.231	-0.533	0.539	0.566	-0.129	1.707	24	19	26	24	25	33	-0.302	0.704413
P34932	Heat shock 70 kDa protein 4 OS=Homo sapiens (Human) OX=9606 GN=HSPA4 PE=1 SV=4	HSPA4	Heat shock 70 kDa protein 4	-3.067	-3.464	-2.066	-1.992	-3.919	-3.569	8	4	9	12	5	5	0.294	0.705566
P49773	Histidine triad nucleotide-binding protein 1 OS=Homo sapiens (Human) OX=9606 GN=HINT1 PE=1 SV=2	HINT1	Histidine triad nucleotide-binding protein 1	2.202	1.775	1.655	2.845	1.003	2.501	0	1	1	1	0	1	-0.239	0.706024
Q16851	UTP--glucose-1-phosphate uridylyltransferase OS=Homo sapiens (Human) OX=9606 GN=UGP2 PE=1 SV=5	UGP2	UTP--glucose-1-phosphate uridylyltransferase	-3.002	-3.815	-1.902	-2.284	-3.509	-3.803	2	2	7	5	3	2	0.292	0.707054
P00390	Glutathione reductase, mitochondrial OS=Homo sapiens (Human) OX=9606 GN=GSR PE=1 SV=2	GSR	Glutathione reductase, mitochondrial	-2.963	-3.614	-2.462	-2.561	-3.691	-2.082	4	2	4	4	1	3	-0.235	0.707113
Q9Y5X9	Endothelial lipase OS=Homo sapiens (Human) OX=9606 GN=LIPG PE=1 SV=1	LIPG	Endothelial lipase	-3.544	-3.307	-3.475	-2.128	-4.59	-4.607	0	0	1	2	0	0	0.333	0.707871
O75635	Serpin B7 OS=Homo sapiens (Human) OX=9606 GN=SERPINB7 PE=1 SV=1	SERPINB7	Serpin B7	-4.321	-1.188	-3.07	-2.3	-3.743	-1.108	0	2	2	3	0	2	-0.476	0.708963
O95793	Double-stranded RNA-binding protein Staufen homolog 1 OS=Homo sapiens (Human) OX=9606 GN=STAU1 PE=1 SV=2	STAU1	Double-stranded RNA-binding protein Staufen homolog 1	-3.043	-4.397	-3.437	-2.138	-4.156	-3.704	3	0	3	5	0	2	-0.293	0.709081
P13639	Elongation factor 2 OS=Homo sapiens (Human) OX=9606 GN=EEF2 PE=1 SV=4	EEF2	Elongation factor 2	-1.738	-2.398	-1.913	-0.953	-2.757	-3.197	13	10	9	14	9	6	0.286	0.709475
Q16706	Alpha-mannosidase 2 OS=Homo sapiens (Human) OX=9606 GN=MAN2A1 PE=1 SV=2	MAN2A1	Alpha-mannosidase 2	-4.207	-3.839	-1.783	-2.421	-4.308	-4.265	0	0	2	3	0	0	0.388	0.7114
P06703	Protein S100-A6 OS=Homo sapiens (Human) OX=9606 GN=S100A6 PE=1 SV=1	S100A6	Protein S100-A6	3.469	3.077	2.374	3.232	1.463	3.395	2	2	2	2	2	2	0.277	0.711751
P00450	Ceruloplasmin OS=Homo sapiens (Human) OX=9606 GN=CP PE=1 SV=1	CP	Ceruloplasmin	-2.677	-3.025	-2.933	-1.889	-4.219	-3.343	4	2	2	6	1	3	0.272	0.712798
O75976	Carboxypeptidase D OS=Homo sapiens (Human) OX=9606 GN=CPD PE=1 SV=2	CPD	Carboxypeptidase D	-2.059	-3.752	-3.529	-1.828	-4.021	-2.498	6	3	3	7	2	4	-0.331	0.713069
P19021	Peptidyl-glycine alpha-amidating monooxygenase OS=Homo sapiens (Human) OX=9606 GN=PAM PE=1 SV=2	PAM	Peptidyl-glycine alpha-amidating monooxygenase	-1.382	-2.649	-2.069	-1.933	-2.828	-1.9	14	5	8	14	7	8	0.188	0.713404
P29401	Transketolase OS=Homo sapiens (Human) OX=9606 GN=TKT PE=1 SV=3	TKT	Transketolase	-0.104	-2.949	-1.451	0.136	-3.907	-2.427	9	2	8	12	2	9	0.564	0.714885
P22304	Iduronate 2-sulfatase OS=Homo sapiens (Human) OX=9606 GN=IDS PE=1 SV=1	IDS	Iduronate 2-sulfatase	-3.935	-0.645	-0.638	-1.02	-3.273	-2.43	3	1	1	3	1	2	0.502	0.714928
P19338	Nucleolin OS=Homo sapiens (Human) OX=9606 GN=NCL PE=1 SV=3	NCL	Nucleolin	-1.172	-2.828	-2.728	-1.766	-3.425	-0.303	10	3	8	10	2	6	-0.411	0.715125
Q01459	Di-N-acetylchitobiase OS=Homo sapiens (Human) OX=9606 GN=CTBS PE=1 SV=1	CTBS	Di-N-acetylchitobiase	-2.095	-4.257	-1.104	-0.245	-4.121	-5.149	3	3	2	3	2	0	0.686	0.716329
Q9NRV9	Heme-binding protein 1 OS=Homo sapiens (Human) OX=9606 GN=HEBP1 PE=1 SV=1	HEBP1	Heme-binding protein 1	0.519	0.595	0.693	1.672	-0.905	0.163	5	5	5	5	2	4	0.292	0.716461
O94766	Galactosylgalactosylxylosylprotein 3-beta-glucuronosyltransferase 3 OS=Homo sapiens (Human) OX=9606 GN=B3GAT3 PE=1 SV=2	B3GAT3	Galactosylgalactosylxylosylprotein 3-beta-glucuronosyltransferase 3	-3.172	-2.938	-2.22	-3.408	-5.065	-1.201	1	2	1	2	0	2	0.448	0.717974
Q15818	Neuronal pentraxin-1 OS=Homo sapiens (Human) OX=9606 GN=NPTX1 PE=2 SV=2	NPTX1	Neuronal pentraxin-1	-0.439	-4.505	-4.077	-2.756	-3.601	-4.244	3	0	0	1	0	0	0.527	0.718163
Q9BVG4	Protein PBDC1 OS=Homo sapiens (Human) OX=9606 GN=PBDC1 PE=1 SV=1	PBDC1	Protein PBDC1	-4.477	-3.514	-2.784	-2.707	-4.979	-4.043	2	1	3	3	1	0	0.318	0.718336
P30405	Peptidyl-prolyl cis-trans isomerase F, mitochondrial OS=Homo sapiens (Human) OX=9606 GN=PPIF PE=1 SV=1	PPIF	Peptidyl-prolyl cis-trans isomerase F, mitochondrial	-0.296	-4.293	-4.76	-2.042	-5.422	0.763	0	0	0	1	0	1	-0.883	0.718554
Q86W92	Liprin-beta-1 OS=Homo sapiens (Human) OX=9606 GN=PPFIBP1 PE=1 SV=2	PPFIBP1	Liprin-beta-1	-3.233	-4.008	-2.761	-2.264	-3.901	-4.789	1	0	2	2	0	0	0.317	0.719882
Q9UMR5	Lysosomal thioesterase PPT2 OS=Homo sapiens (Human) OX=9606 GN=PPT2 PE=1 SV=4	PPT2	Lysosomal thioesterase PPT2	-4.575	-2.884	-3.149	-2.792	-3.87	-4.86	0	0	1	0	1	0	0.305	0.721286
Q9UI42	Carboxypeptidase A4 OS=Homo sapiens (Human) OX=9606 GN=CPA4 PE=1 SV=2	CPA4	Carboxypeptidase A4	-2.368	-2.352	-2.087	-2.415	-1.639	-2.434	3	3	5	4	4	2	-0.106	0.721347
P09601	Heme oxygenase 1 OS=Homo sapiens (Human) OX=9606 GN=HMOX1 PE=1 SV=1	HMOX1	Heme oxygenase 1	-1.638	-4.196	-4.379	-3.741	-4.549	-3.048	2	0	1	0	0	0	0.375	0.722597
O75937	DnaJ homolog subfamily C member 8 OS=Homo sapiens (Human) OX=9606 GN=DNAJC8 PE=1 SV=2	DNAJC8	DnaJ homolog subfamily C member 8	-0.979	-2.567	-2.941	-0.273	-4.043	-3.697	3	0	2	4	2	1	0.509	0.724593
P01834	Immunoglobulin kappa constant OS=Homo sapiens (Human) OX=9606 GN=IGKC PE=1 SV=2	IGKC	Immunoglobulin kappa constant	-4.389	-2.874	-3.355	-2.719	-5.149	-1.425	0	1	1	2	0	3	-0.442	0.727071
Q7Z7G0	Target of Nesh-SH3 OS=Homo sapiens (Human) OX=9606 GN=ABI3BP PE=1 SV=1	ABI3BP	Target of Nesh-SH3	-2.914	-2.807	-4.543	-3.589	-3.94	-1.746	0	1	1	2	1	2	-0.33	0.727772
Q14257	Reticulocalbin-2 OS=Homo sapiens (Human) OX=9606 GN=RCN2 PE=1 SV=1	RCN2	Reticulocalbin-2	-1.867	-5.777	-2.493	-2.906	-3.64	-5.13	0	0	1	1	0	0	0.513	0.72848
P05161	Ubiquitin-like protein ISG15 OS=Homo sapiens (Human) OX=9606 GN=ISG15 PE=1 SV=5	ISG15	Ubiquitin-like protein ISG15	-1.76	-1.372	0.015	0.464	-2.782	0.558	3	2	4	3	2	4	-0.452	0.730276
P08195	4F2 cell-surface antigen heavy chain OS=Homo sapiens (Human) OX=9606 GN=SLC3A2 PE=1 SV=3	SLC3A2	4F2 cell-surface antigen heavy chain	-2.18	-3.565	-4.342	-2.844	-4.871	-0.946	5	1	3	4	0	4	-0.475	0.733027
P25398	40S ribosomal protein S12 OS=Homo sapiens (Human) OX=9606 GN=RPS12 PE=1 SV=3	RPS12	40S ribosomal protein S12	-4.408	-0.734	-4.625	-3.566	-2.248	-5.671	1	1	1	1	2	1	0.573	0.739809
Q9HDC9	Adipocyte plasma membrane-associated protein OS=Homo sapiens (Human) OX=9606 GN=APMAP PE=1 SV=2	APMAP	Adipocyte plasma membrane-associated protein	-2.752	0.776	-0.223	0.073	-0.021	-4.087	1	1	1	1	1	2	0.612	0.740949
P24666	Low molecular weight phosphotyrosine protein phosphatase OS=Homo sapiens (Human) OX=9606 GN=ACP1 PE=1 SV=3	ACP1	Low molecular weight phosphotyrosine protein phosphatase	-3.662	-3.562	-3.137	-1.994	-4.412	-3.204	2	2	2	4	1	2	-0.25	0.744904
O60925	Prefoldin subunit 1 OS=Homo sapiens (Human) OX=9606 GN=PFDN1 PE=1 SV=2	PFDN1	Prefoldin subunit 1	-1.434	-0.78	-1.178	0.648	-2.884	-2.311	3	1	2	3	1	2	0.385	0.746458
Q9UBE0	SUMO-activating enzyme subunit 1 OS=Homo sapiens (Human) OX=9606 GN=SAE1 PE=1 SV=1	SAE1	SUMO-activating enzyme subunit 1	-5.631	-3.712	-4.393	-3.813	-4.467	-4.805	1	1	1	2	0	0	-0.217	0.748694
P04792	Heat shock protein beta-1 OS=Homo sapiens (Human) OX=9606 GN=HSPB1 PE=1 SV=2	HSPB1	Heat shock protein beta-1	-2.212	-1.392	0.333	1.059	-3.366	-2.561	4	1	6	7	4	4	0.532	0.749182
P28072	Proteasome subunit beta type-6 OS=Homo sapiens (Human) OX=9606 GN=PSMB6 PE=1 SV=4	PSMB6	Proteasome subunit beta type-6	-0.347	-1.67	-1.786	-0.609	-4.532	-0.161	2	1	1	2	0	3	0.5	0.749738
P62263	40S ribosomal protein S14 OS=Homo sapiens (Human) OX=9606 GN=RPS14 PE=1 SV=3	RPS14	40S ribosomal protein S14	-3.283	-0.826	-0.741	-0.153	-3.9	0.929	1	2	2	2	0	2	-0.575	0.749815
Q24JP5	Transmembrane protein 132A OS=Homo sapiens (Human) OX=9606 GN=TMEM132A PE=1 SV=1	TMEM132A	Transmembrane protein 132A	-4.448	-3.274	-5.029	-3.325	-4.407	-4.379	2	0	1	2	0	0	-0.213	0.750853
P53396	ATP-citrate synthase OS=Homo sapiens (Human) OX=9606 GN=ACLY PE=1 SV=3	ACLY	ATP-citrate synthase	-2.961	-3.71	-3.422	-1.858	-4.88	-4.328	4	3	4	8	0	0	0.324	0.750997
P12273	Prolactin-inducible protein OS=Homo sapiens (Human) OX=9606 GN=PIP PE=1 SV=1	PIP	Prolactin-inducible protein	-3.065	-0.268	-1.105	-2.522	-2.983	-0.16	1	1	1	2	1	2	0.409	0.75127
Q15025	TNFAIP3-interacting protein 1 OS=Homo sapiens (Human) OX=9606 GN=TNIP1 PE=1 SV=2	TNIP1	TNFAIP3-interacting protein 1	-3.897	-4.89	-4.224	-3.888	-5.279	-3.14	0	0	0	0	0	2	-0.235	0.751334
Q7Z5L9	Interferon regulatory factor 2-binding protein 2 OS=Homo sapiens (Human) OX=9606 GN=IRF2BP2 PE=1 SV=2	IRF2BP2	Interferon regulatory factor 2-binding protein 2	-4.442	-4.112	-4.527	-4.334	-5.164	-3.967	1	0	1	1	0	0	0.128	0.751358
Q6WCQ1	Myosin phosphatase Rho-interacting protein OS=Homo sapiens (Human) OX=9606 GN=MPRIP PE=1 SV=3	MPRIP	Myosin phosphatase Rho-interacting protein	-3.195	-4.695	-4.334	-4.166	-4.44	-4.09	3	0	0	2	0	0	0.157	0.752479
P22314	Ubiquitin-like modifier-activating enzyme 1 OS=Homo sapiens (Human) OX=9606 GN=UBA1 PE=1 SV=3	UBA1	Ubiquitin-like modifier-activating enzyme 1	-1.521	-3.148	-2.467	-1.335	-4.052	-2.667	12	5	11	13	2	8	0.306	0.754593
O60513	Beta-1,4-galactosyltransferase 4 OS=Homo sapiens (Human) OX=9606 GN=B4GALT4 PE=1 SV=1	B4GALT4	Beta-1,4-galactosyltransferase 4	-2.565	-3.956	-2.844	-1.778	-1.933	-4.632	3	0	2	3	2	0	-0.341	0.755037
P80723	Brain acid soluble protein 1 OS=Homo sapiens (Human) OX=9606 GN=BASP1 PE=1 SV=2	BASP1	Brain acid soluble protein 1	-3.817	-3.627	-3.144	-2.52	-4.481	-4.236	4	1	6	6	3	1	0.217	0.755054
Q13510	Acid ceramidase OS=Homo sapiens (Human) OX=9606 GN=ASAH1 PE=1 SV=5	ASAH1	Acid ceramidase	-3.554	-1.03	-1.936	-0.743	-2.573	-2.272	0	1	1	2	2	2	-0.311	0.755408
P50281	Matrix metalloproteinase-14 OS=Homo sapiens (Human) OX=9606 GN=MMP14 PE=1 SV=3	MMP14	Matrix metalloproteinase-14	3.848	3.049	2.817	3.974	0.922	3.783	8	6	7	8	5	7	0.345	0.755734
Q9BQE5	Apolipoprotein L2 OS=Homo sapiens (Human) OX=9606 GN=APOL2 PE=1 SV=1	APOL2	Apolipoprotein L2	-3.841	-3.381	-3.283	-2.033	-4.219	-3.583	0	0	2	3	0	0	-0.223	0.756592
Q01813	ATP-dependent 6-phosphofructokinase, platelet type OS=Homo sapiens (Human) OX=9606 GN=PFKP PE=1 SV=2	PFKP	ATP-dependent 6-phosphofructokinase, platelet type	-1.872	-3.975	-2.42	-1.028	-4.609	-3.884	3	0	2	2	0	1	0.418	0.757029
P14735	Insulin-degrading enzyme OS=Homo sapiens (Human) OX=9606 GN=IDE PE=1 SV=4	IDE	Insulin-degrading enzyme	-4.24	-3.76	-2.158	-2.359	-4.643	-4.079	1	0	7	3	0	1	0.308	0.757642
P07814	Bifunctional glutamate/proline--tRNA ligase OS=Homo sapiens (Human) OX=9606 GN=EPRS1 PE=1 SV=5	EPRS1	Bifunctional glutamate/proline--tRNA ligase	-4.526	-3.502	-3.637	-3.139	-4.748	-4.352	2	2	3	4	0	1	0.191	0.75836
P35052	Glypican-1 OS=Homo sapiens (Human) OX=9606 GN=GPC1 PE=1 SV=2	GPC1	Glypican-1	-2.604	-3.898	-3.286	-3.471	-4.333	-0.904	4	2	1	3	1	7	-0.36	0.758946
P26641	Elongation factor 1-gamma OS=Homo sapiens (Human) OX=9606 GN=EEF1G PE=1 SV=3	EEF1G	Elongation factor 1-gamma	-2.237	-3.167	-2.624	-2.016	-4.98	-2.03	3	1	3	3	0	2	0.333	0.76103
Q9P0K7	Ankycorbin OS=Homo sapiens (Human) OX=9606 GN=RAI14 PE=1 SV=2	RAI14	Ankycorbin	-2.407	-3.704	-3.487	-1.747	-4.313	-4.488	5	0	4	7	1	0	0.316	0.761375
P30048	Thioredoxin-dependent peroxide reductase, mitochondrial OS=Homo sapiens (Human) OX=9606 GN=PRDX3 PE=1 SV=3	PRDX3	Thioredoxin-dependent peroxide reductase, mitochondrial	-1.929	-4.117	-1.699	-1.598	-4.491	-2.768	3	0	2	3	0	1	0.37	0.761493
Q9NZL9	Methionine adenosyltransferase 2 subunit beta OS=Homo sapiens (Human) OX=9606 GN=MAT2B PE=1 SV=1	MAT2B	Methionine adenosyltransferase 2 subunit beta	-2.378	-3.397	-2.244	-0.976	-4.248	-3.863	5	2	4	7	1	2	0.356	0.761611
Q9Y623	Myosin-4 OS=Homo sapiens (Human) OX=9606 GN=MYH4 PE=2 SV=2	MYH4	Myosin-4	1.089	-4.682	-5.055	-3.772	-2.509	-4.377	4	1	0	0	0	0	0.67	0.761639
P31939	Bifunctional purine biosynthesis protein PURH OS=Homo sapiens (Human) OX=9606 GN=ATIC PE=1 SV=3	ATIC	Bifunctional purine biosynthesis protein PURH	-3.483	-2.97	-3.195	-2.009	-3.786	-4.611	1	1	2	3	0	0	0.253	0.762485
P50991	T-complex protein 1 subunit delta OS=Homo sapiens (Human) OX=9606 GN=CCT4 PE=1 SV=4	CCT4	T-complex protein 1 subunit delta	-2	-2.702	-3.201	-2.14	-3.839	-2.525	7	5	7	7	0	4	0.201	0.76302
Q99471	Prefoldin subunit 5 OS=Homo sapiens (Human) OX=9606 GN=PFDN5 PE=1 SV=2	PFDN5	Prefoldin subunit 5	-1.78	-3.61	-1.115	-1.203	-2.634	-3.661	1	0	2	3	0	3	0.331	0.764216
P11717	Cation-independent mannose-6-phosphate receptor OS=Homo sapiens (Human) OX=9606 GN=IGF2R PE=1 SV=3	IGF2R	Cation-independent mannose-6-phosphate receptor	-2.561	-3.53	-3.455	-3.964	-3.44	-1.315	6	3	3	3	5	9	-0.276	0.766702
O00560	Syntenin-1 OS=Homo sapiens (Human) OX=9606 GN=SDCBP PE=1 SV=1	SDCBP	Syntenin-1	-1.247	-4.911	-2.6	-3.076	-3.829	-2.905	3	0	0	1	0	1	0.351	0.767141
P35030	Trypsin-3 OS=Homo sapiens (Human) OX=9606 GN=PRSS3 PE=1 SV=2	PRSS3	Trypsin-3	4.264	7.18	6.169	5.057	3.093	7.913	1	1	1	1	1	1	0.517	0.768404
P25786	Proteasome subunit alpha type-1 OS=Homo sapiens (Human) OX=9606 GN=PSMA1 PE=1 SV=1	PSMA1	Proteasome subunit alpha type-1	-2.359	-2.157	-0.557	0.242	-3.912	-2.685	3	4	5	6	2	2	0.427	0.768894
Q99536	Synaptic vesicle membrane protein VAT-1 homolog OS=Homo sapiens (Human) OX=9606 GN=VAT1 PE=1 SV=2	VAT1	Synaptic vesicle membrane protein VAT-1 homolog	-2.409	-3.741	-3.112	-1.894	-4.178	-3.955	2	1	4	5	1	1	0.255	0.772087
P61604	10 kDa heat shock protein, mitochondrial OS=Homo sapiens (Human) OX=9606 GN=HSPE1 PE=1 SV=2	HSPE1	10 kDa heat shock protein, mitochondrial	-0.868	-1.473	-0.452	0.463	-3.068	-1.17	4	4	5	4	2	3	0.327	0.773467
P17405	Sphingomyelin phosphodiesterase OS=Homo sapiens (Human) OX=9606 GN=SMPD1 PE=1 SV=5	SMPD1	Sphingomyelin phosphodiesterase	-3.503	-3.132	-2.46	-1.364	-4.33	-4.359	1	1	1	2	0	1	0.319	0.773986
Q9UI30	Multifunctional methyltransferase subunit TRM112-like protein OS=Homo sapiens (Human) OX=9606 GN=TRMT112 PE=1 SV=1	TRMT112	Multifunctional methyltransferase subunit TRM112-like protein	-4.228	-2.207	-2.808	-2.151	-5.045	-3.007	0	0	1	1	0	0	0.32	0.775284
Q08629	Testican-1 OS=Homo sapiens (Human) OX=9606 GN=SPOCK1 PE=1 SV=1	SPOCK1	Testican-1	-3.037	-3.46	-2.928	-2.954	-3.683	-2.423	3	1	2	3	3	3	-0.122	0.77616
P05109	Protein S100-A8 OS=Homo sapiens (Human) OX=9606 GN=S100A8 PE=1 SV=1	S100A8	Protein S100-A8	-0.768	0.343	-0.015	0.694	-3.346	0.922	2	3	2	3	1	2	0.43	0.777787
P12643	Bone morphogenetic protein 2 OS=Homo sapiens (Human) OX=9606 GN=BMP2 PE=1 SV=1	BMP2	Bone morphogenetic protein 2	-3.588	-3.717	-2.089	-1.488	-5.01	-1.775	1	0	3	3	0	2	-0.374	0.778639
Q9UNZ2	NSFL1 cofactor p47 OS=Homo sapiens (Human) OX=9606 GN=NSFL1C PE=1 SV=2	NSFL1C	NSFL1 cofactor p47	-2.609	-4.099	-5.159	-3.883	-4.878	-3.838	2	1	2	1	0	0	0.244	0.779298
P51149	Ras-related protein Rab-7a OS=Homo sapiens (Human) OX=9606 GN=RAB7A PE=1 SV=1	RAB7A	Ras-related protein Rab-7a	-2.125	-2.809	-2.54	-1.093	-4.586	-2.707	3	0	3	2	0	2	0.304	0.782487
P02462	Collagen alpha-1(IV) chain OS=Homo sapiens (Human) OX=9606 GN=COL4A1 PE=1 SV=4	COL4A1	Collagen alpha-1(IV) chain	-2.344	-3.522	-0.876	-2.123	-1.824	-2.114	4	1	7	5	5	4	-0.227	0.783009
Q15181	Inorganic pyrophosphatase OS=Homo sapiens (Human) OX=9606 GN=PPA1 PE=1 SV=2	PPA1	Inorganic pyrophosphatase	-2.857	-3.639	-2.411	-2.266	-3.665	-3.472	2	0	1	2	2	2	0.166	0.784507
Q15084	Protein disulfide-isomerase A6 OS=Homo sapiens (Human) OX=9606 GN=PDIA6 PE=1 SV=1	PDIA6	Protein disulfide-isomerase A6	-2.938	-4.341	-3.466	-2.78	-4.089	-3.388	4	1	2	5	2	4	-0.163	0.784695
Q16658	Fascin OS=Homo sapiens (Human) OX=9606 GN=FSCN1 PE=1 SV=3	FSCN1	Fascin	-2.407	-3.163	-3.243	-0.259	-4.648	-2.773	2	1	2	4	1	1	-0.378	0.785632
P01871	Immunoglobulin heavy constant mu OS=Homo sapiens (Human) OX=9606 GN=IGHM PE=1 SV=4	IGHM	Immunoglobulin heavy constant mu	-4.271	-3.618	-4.531	-4.957	-4.629	-1.979	0	0	0	0	0	3	-0.285	0.785705
Q12765	Secernin-1 OS=Homo sapiens (Human) OX=9606 GN=SCRN1 PE=1 SV=2	SCRN1	Secernin-1	-3.343	-4.163	-3.473	-2.635	-4.166	-4.775	1	1	1	3	1	0	0.199	0.785975
Q16363	Laminin subunit alpha-4 OS=Homo sapiens (Human) OX=9606 GN=LAMA4 PE=1 SV=4	LAMA4	Laminin subunit alpha-4	-3.969	-2.958	-3.992	-1.571	-4.179	-4.335	1	4	2	13	0	0	-0.278	0.786662
O14498	Immunoglobulin superfamily containing leucine-rich repeat protein OS=Homo sapiens (Human) OX=9606 GN=ISLR PE=2 SV=1	ISLR	Immunoglobulin superfamily containing leucine-rich repeat protein	-2.651	-3.647	-3.992	-4.536	-4.709	-1.902	2	1	0	0	0	4	0.286	0.787932
Q14247	Src substrate cortactin OS=Homo sapiens (Human) OX=9606 GN=CTTN PE=1 SV=2	CTTN	Src substrate cortactin	-2.982	-2.894	-2.347	-1.219	-4.537	-3.306	4	4	6	10	1	2	0.28	0.790975
Q9UHB6	LIM domain and actin-binding protein 1 OS=Homo sapiens (Human) OX=9606 GN=LIMA1 PE=1 SV=1	LIMA1	LIM domain and actin-binding protein 1	-3.066	-3.676	-3.766	-2.731	-3.389	-4.022	2	2	2	5	2	0	-0.122	0.791645
P27797	Calreticulin OS=Homo sapiens (Human) OX=9606 GN=CALR PE=1 SV=1	CALR	Calreticulin	-0.702	-3.328	-1.181	0.112	-3.196	-3.294	3	1	2	3	2	1	0.389	0.792177
P46777	60S ribosomal protein L5 OS=Homo sapiens (Human) OX=9606 GN=RPL5 PE=1 SV=3	RPL5	60S ribosomal protein L5	-1.667	-2.515	-2.913	-1.409	-4.462	-0.102	2	0	2	1	0	1	-0.374	0.79457
Q01844	RNA-binding protein EWS OS=Homo sapiens (Human) OX=9606 GN=EWSR1 PE=1 SV=1	EWSR1	RNA-binding protein EWS	1.091	-3.313	-3.22	0.754	-4.629	-3.384	2	0	1	2	1	1	0.606	0.795074
P39059	Collagen alpha-1(XV) chain OS=Homo sapiens (Human) OX=9606 GN=COL15A1 PE=1 SV=2	COL15A1	Collagen alpha-1(XV) chain	-1.639	-3.094	0.3	-0.063	-4.862	-0.974	3	1	5	4	1	3	0.489	0.796004
P13611	Versican core protein OS=Homo sapiens (Human) OX=9606 GN=VCAN PE=1 SV=3	VCAN	Versican core protein	-2.256	-3.053	-2.774	-1.942	-4.253	-1.079	3	1	1	3	2	2	-0.269	0.796185
Q96CT7	Coiled-coil domain-containing protein 124 OS=Homo sapiens (Human) OX=9606 GN=CCDC124 PE=1 SV=1	CCDC124	Coiled-coil domain-containing protein 124	-1.304	-4.968	-3.691	-2.34	-4.159	-4.513	4	1	3	3	1	1	0.35	0.796221
P31948	Stress-induced-phosphoprotein 1 OS=Homo sapiens (Human) OX=9606 GN=STIP1 PE=1 SV=1	STIP1	Stress-induced-phosphoprotein 1	-1.03	-2.42	-1.474	-0.642	-2.913	-2.012	19	10	16	20	11	12	0.214	0.796643
Q96PD2	Discoidin, CUB and LCCL domain-containing protein 2 OS=Homo sapiens (Human) OX=9606 GN=DCBLD2 PE=1 SV=1	DCBLD2	Discoidin, CUB and LCCL domain-containing protein 2	-1.247	-4.065	-4.149	-2.818	-3.923	-3.547	2	0	0	1	0	1	0.276	0.79781
P49589	Cysteine--tRNA ligase, cytoplasmic OS=Homo sapiens (Human) OX=9606 GN=CARS1 PE=1 SV=3	CARS1	Cysteine--tRNA ligase, cytoplasmic	-2.389	-4.133	-3.595	-1.737	-3.59	-4.068	3	0	1	5	0	0	-0.24	0.79797
P05090	Apolipoprotein D OS=Homo sapiens (Human) OX=9606 GN=APOD PE=1 SV=1	APOD	Apolipoprotein D	-3.092	-2.711	-3.944	-4.651	-3.387	-0.719	1	1	1	1	1	1	-0.33	0.799362
P14174	Macrophage migration inhibitory factor OS=Homo sapiens (Human) OX=9606 GN=MIF PE=1 SV=4	MIF	Macrophage migration inhibitory factor	5.566	1.571	5.268	5.806	4.085	3.681	1	1	1	1	1	1	-0.389	0.800425
P13501	C-C motif chemokine 5 OS=Homo sapiens (Human) OX=9606 GN=CCL5 PE=1 SV=3	CCL5	C-C motif chemokine 5	1.014	2.629	2.014	2.309	-0.195	4.76	1	1	1	1	2	2	-0.406	0.800683
P23588	Eukaryotic translation initiation factor 4B OS=Homo sapiens (Human) OX=9606 GN=EIF4B PE=1 SV=2	EIF4B	Eukaryotic translation initiation factor 4B	-1.657	-2.194	-3.526	-2.185	-3.567	-2.195	3	0	1	1	0	2	0.19	0.804681
P04080	Cystatin-B OS=Homo sapiens (Human) OX=9606 GN=CSTB PE=1 SV=2	CSTB	Cystatin-B	2.157	1.318	0.519	2.497	-1.495	1.936	2	1	2	1	1	2	0.351	0.805262
P37840	Alpha-synuclein OS=Homo sapiens (Human) OX=9606 GN=SNCA PE=1 SV=1	SNCA	Alpha-synuclein	-0.554	-3.911	-4.579	-1.836	-4.263	-4.099	1	0	0	1	0	0	0.385	0.806674
Q9HB40	Retinoid-inducible serine carboxypeptidase OS=Homo sapiens (Human) OX=9606 GN=SCPEP1 PE=1 SV=1	SCPEP1	Retinoid-inducible serine carboxypeptidase	-2.854	-3.887	-2.97	-2.465	-4.767	-1.721	0	1	2	3	0	2	-0.252	0.808118
Q9Y263	Phospholipase A-2-activating protein OS=Homo sapiens (Human) OX=9606 GN=PLAA PE=1 SV=2	PLAA	Phospholipase A-2-activating protein	-2.814	-4.689	-4.564	-2.042	-4.98	-4.216	1	0	1	2	0	0	-0.277	0.808446
P41250	Glycine--tRNA ligase OS=Homo sapiens (Human) OX=9606 GN=GARS1 PE=1 SV=3	GARS1	Glycine--tRNA ligase	-2.103	-3.774	-3.716	-1.253	-3.542	-4.015	1	0	1	6	0	1	-0.261	0.809261
P15880	40S ribosomal protein S2 OS=Homo sapiens (Human) OX=9606 GN=RPS2 PE=1 SV=2	RPS2	40S ribosomal protein S2	-2.442	-2.303	-3.334	-1.319	-3.882	-3.546	4	3	3	4	1	2	0.223	0.809944
P01591	Immunoglobulin J chain OS=Homo sapiens (Human) OX=9606 GN=JCHAIN PE=1 SV=4	JCHAIN	Immunoglobulin J chain	-3.546	-1.582	-1.863	-3.413	-4.015	1.977	0	1	1	1	0	3	-0.514	0.810069
P33176	Kinesin-1 heavy chain OS=Homo sapiens (Human) OX=9606 GN=KIF5B PE=1 SV=1	KIF5B	Kinesin-1 heavy chain	-3.363	-4.135	-3.367	-2.335	-3.904	-4.149	5	1	5	15	0	4	-0.159	0.811498
Q92888	Rho guanine nucleotide exchange factor 1 OS=Homo sapiens (Human) OX=9606 GN=ARHGEF1 PE=1 SV=2	ARHGEF1	Rho guanine nucleotide exchange factor 1	-3.141	-4.779	-4.227	-3.921	-4.705	-3.939	1	0	1	2	0	0	0.139	0.811586
P09622	Dihydrolipoyl dehydrogenase, mitochondrial OS=Homo sapiens (Human) OX=9606 GN=DLD PE=1 SV=2	DLD	Dihydrolipoyl dehydrogenase, mitochondrial	-3.901	-3.779	-4.62	-2.893	-5.167	-3.693	2	0	0	1	0	1	-0.182	0.811741
P04279	Semenogelin-1 OS=Homo sapiens (Human) OX=9606 GN=SEMG1 PE=1 SV=2	SEMG1	Semenogelin-1	-3.525	-4.617	-4.715	-4.982	-4.363	-2.981	0	0	0	0	0	2	-0.177	0.814136
Q8IZP0	Abl interactor 1 OS=Homo sapiens (Human) OX=9606 GN=ABI1 PE=1 SV=4	ABI1	Abl interactor 1	-3.78	-5.086	-4.221	-2.246	-4.917	-5.166	1	0	0	4	0	0	-0.253	0.814721
O15460	Prolyl 4-hydroxylase subunit alpha-2 OS=Homo sapiens (Human) OX=9606 GN=P4HA2 PE=1 SV=1	P4HA2	Prolyl 4-hydroxylase subunit alpha-2	-3.899	-3.894	-3.083	-3.27	-4.054	-3.27	1	1	1	2	1	3	-0.094	0.814795
Q05682	Caldesmon OS=Homo sapiens (Human) OX=9606 GN=CALD1 PE=1 SV=3	CALD1	Caldesmon	-0.025	-0.576	-0.454	-0.274	-0.709	-0.241	10	9	9	10	10	9	0.056	0.815532
P01857	Immunoglobulin heavy constant gamma 1 OS=Homo sapiens (Human) OX=9606 GN=IGHG1 PE=1 SV=1	IGHG1	Immunoglobulin heavy constant gamma 1	-1.806	0.363	-0.692	-0.467	-4.066	1.157	0	3	3	2	0	3	0.413	0.816168
Q8WZA9	Immunity-related GTPase family Q protein OS=Homo sapiens (Human) OX=9606 GN=IRGQ PE=1 SV=1	IRGQ	Immunity-related GTPase family Q protein	-4.445	-4.134	-4.881	-6.242	-4.973	-2.971	1	0	1	0	0	0	0.242	0.816492
Q9Y3B8	Oligoribonuclease, mitochondrial OS=Homo sapiens (Human) OX=9606 GN=REXO2 PE=1 SV=3	REXO2	Oligoribonuclease, mitochondrial	-1.79	-1.73	-0.821	1.183	-2.189	-2.436	3	3	2	4	3	3	-0.3	0.816501
P69891	Hemoglobin subunit gamma-1 OS=Homo sapiens (Human) OX=9606 GN=HBG1 PE=1 SV=2	HBG1	Hemoglobin subunit gamma-1	-2.031	-1.806	-2.243	-1.06	-4.516	0.623	1	1	1	0	1	2	-0.376	0.816773
P16949	Stathmin OS=Homo sapiens (Human) OX=9606 GN=STMN1 PE=1 SV=3	STMN1	Stathmin	0.378	-1.282	-0.958	2.222	-3.816	1.16	3	1	3	4	0	4	-0.476	0.817359
P26447	Protein S100-A4 OS=Homo sapiens (Human) OX=9606 GN=S100A4 PE=1 SV=1	S100A4	Protein S100-A4	-3.979	-3.067	-4.352	-4.231	-3.728	-3.745	1	1	2	2	0	0	0.102	0.818688
P23634	Plasma membrane calcium-transporting ATPase 4 OS=Homo sapiens (Human) OX=9606 GN=ATP2B4 PE=1 SV=2	ATP2B4	Plasma membrane calcium-transporting ATPase 4	-0.781	-2.908	-1.814	0.038	-2.928	-3.536	1	1	1	1	0	0	0.308	0.819592
O95969	Secretoglobin family 1D member 2 OS=Homo sapiens (Human) OX=9606 GN=SCGB1D2 PE=2 SV=1	SCGB1D2	Secretoglobin family 1D member 2	-3.851	0.127	-1.914	-3.25	-0.231	-1.103	0	1	0	0	1	1	-0.352	0.821143
O14618	Copper chaperone for superoxide dismutase OS=Homo sapiens (Human) OX=9606 GN=CCS PE=1 SV=1	CCS	Copper chaperone for superoxide dismutase	-3.796	-3.325	-3.585	-2.23	-3.001	-4.9	0	0	0	3	0	0	-0.192	0.823398
Q99538	Legumain OS=Homo sapiens (Human) OX=9606 GN=LGMN PE=1 SV=1	LGMN	Legumain	-1.354	-1.735	0.838	-0.69	-0.744	-1.412	6	5	10	6	8	7	0.198	0.824251
O75608	Acyl-protein thioesterase 1 OS=Homo sapiens (Human) OX=9606 GN=LYPLA1 PE=1 SV=1	LYPLA1	Acyl-protein thioesterase 1	-3.401	-2.412	-0.019	0.408	-3.571	-3.862	2	0	1	1	0	0	0.397	0.827114
P54577	Tyrosine--tRNA ligase, cytoplasmic OS=Homo sapiens (Human) OX=9606 GN=YARS1 PE=1 SV=4	YARS1	Tyrosine--tRNA ligase, cytoplasmic	-3.361	-3.165	-3.104	-1.455	-4.597	-4.274	2	1	4	6	0	1	0.232	0.828007
P09913	Interferon-induced protein with tetratricopeptide repeats 2 OS=Homo sapiens (Human) OX=9606 GN=IFIT2 PE=1 SV=1	IFIT2	Interferon-induced protein with tetratricopeptide repeats 2	-4.528	-4.58	-2.55	-2.368	-3.693	-4.909	1	0	1	3	0	0	-0.23	0.828438
P54652	Heat shock-related 70 kDa protein 2 OS=Homo sapiens (Human) OX=9606 GN=HSPA2 PE=1 SV=1	HSPA2	Heat shock-related 70 kDa protein 2	-3.26	-4.504	-4.489	-3.002	-4.73	-4.072	1	0	0	2	0	0	-0.15	0.82926
P07108	Acyl-CoA-binding protein OS=Homo sapiens (Human) OX=9606 GN=DBI PE=1 SV=2	DBI	Acyl-CoA-binding protein	-1.999	-3.984	-2.316	-0.436	-3.789	-3.248	4	0	3	3	1	0	-0.275	0.831002
Q9NZU5	LIM and cysteine-rich domains protein 1 OS=Homo sapiens (Human) OX=9606 GN=LMCD1 PE=1 SV=1	LMCD1	LIM and cysteine-rich domains protein 1	-3.624	-4.282	-0.662	-1.864	-3.523	-4.056	1	0	2	0	0	0	0.292	0.832788
P42785	Lysosomal Pro-X carboxypeptidase OS=Homo sapiens (Human) OX=9606 GN=PRCP PE=1 SV=1	PRCP	Lysosomal Pro-X carboxypeptidase	-2.28	-3.438	-0.912	-0.248	-4.52	-2.831	2	0	2	2	1	2	0.323	0.833736
Q01469	Fatty acid-binding protein 5 OS=Homo sapiens (Human) OX=9606 GN=FABP5 PE=1 SV=3	FABP5	Fatty acid-binding protein 5	-0.228	-1.98	-1.374	0.471	-2.804	-1.993	5	3	4	5	2	2	0.248	0.834158
P13489	Ribonuclease inhibitor OS=Homo sapiens (Human) OX=9606 GN=RNH1 PE=1 SV=2	RNH1	Ribonuclease inhibitor	-2.785	-3.92	-2.758	-2.864	-4.442	-1.544	2	2	1	5	1	4	-0.204	0.83521
P43251	Biotinidase OS=Homo sapiens (Human) OX=9606 GN=BTD PE=1 SV=2	BTD	Biotinidase	-2.345	-3.531	-2.032	-1.71	-4.194	-2.577	1	0	1	2	0	1	0.191	0.835347
P50990	T-complex protein 1 subunit theta OS=Homo sapiens (Human) OX=9606 GN=CCT8 PE=1 SV=4	CCT8	T-complex protein 1 subunit theta	-2.084	-3.392	-3.241	-1.915	-4.23	-1.999	7	0	7	7	1	6	-0.191	0.835774
P41236	Protein phosphatase inhibitor 2 OS=Homo sapiens (Human) OX=9606 GN=PPP1R2 PE=1 SV=2	PPP1R2	Protein phosphatase inhibitor 2	-3.819	-3.929	-4.134	-2.598	-4.723	-4.137	0	0	1	2	0	0	-0.142	0.835802
O43765	Small glutamine-rich tetratricopeptide repeat-containing protein alpha OS=Homo sapiens (Human) OX=9606 GN=SGTA PE=1 SV=1	SGTA	Small glutamine-rich tetratricopeptide repeat-containing protein alpha	-3.239	-3.902	-3.266	-1.388	-6.056	-3.861	2	0	0	1	0	0	0.299	0.83743
Q9BR76	Coronin-1B OS=Homo sapiens (Human) OX=9606 GN=CORO1B PE=1 SV=1	CORO1B	Coronin-1B	-1.928	-3.158	-3.569	-1.843	-3.443	-3.882	4	1	1	5	1	2	0.171	0.839732
Q99584	Protein S100-A13 OS=Homo sapiens (Human) OX=9606 GN=S100A13 PE=1 SV=1	S100A13	Protein S100-A13	-2.384	-3.435	-2.677	-0.941	-3.161	-3.798	2	0	2	2	0	0	-0.198	0.839976
Q9Y240	C-type lectin domain family 11 member A OS=Homo sapiens (Human) OX=9606 GN=CLEC11A PE=1 SV=1	CLEC11A	C-type lectin domain family 11 member A	1.792	-0.72	-0.456	1.833	-1.657	-0.385	8	6	4	9	5	6	0.275	0.842225
Q16555	Dihydropyrimidinase-related protein 2 OS=Homo sapiens (Human) OX=9606 GN=DPYSL2 PE=1 SV=1	DPYSL2	Dihydropyrimidinase-related protein 2	-2.361	-3.639	-2.853	-1.844	-3.995	-3.485	8	1	5	8	3	7	0.158	0.843518
P20290	Transcription factor BTF3 OS=Homo sapiens (Human) OX=9606 GN=BTF3 PE=1 SV=1	BTF3	Transcription factor BTF3	-1.516	-3.46	-3.372	-1.041	-4.61	-3.47	1	0	0	2	0	0	0.258	0.843881
Q14157	Ubiquitin-associated protein 2-like OS=Homo sapiens (Human) OX=9606 GN=UBAP2L PE=1 SV=2	UBAP2L	Ubiquitin-associated protein 2-like	-1.768	-4.061	-2.704	-2.344	-4.376	-2.402	4	0	2	5	0	2	0.196	0.845446
P39687	Acidic leucine-rich nuclear phosphoprotein 32 family member A OS=Homo sapiens (Human) OX=9606 GN=ANP32A PE=1 SV=1	ANP32A	Acidic leucine-rich nuclear phosphoprotein 32 family member A	-0.562	-2.789	-4.064	-1.027	-2.501	-3.143	3	0	2	3	1	2	-0.248	0.846392
Q99426	Tubulin-folding cofactor B OS=Homo sapiens (Human) OX=9606 GN=TBCB PE=1 SV=2	TBCB	Tubulin-folding cofactor B	-0.89	-4.265	-4.27	-1.541	-4.761	-2.205	2	0	0	1	0	0	-0.306	0.847829
P13497	Bone morphogenetic protein 1 OS=Homo sapiens (Human) OX=9606 GN=BMP1 PE=1 SV=2	BMP1	Bone morphogenetic protein 1	-2.273	-2.884	-1.96	-1.536	-3.373	-2.568	9	10	11	11	6	9	0.12	0.85011
Q9BUD6	Spondin-2 OS=Homo sapiens (Human) OX=9606 GN=SPON2 PE=1 SV=3	SPON2	Spondin-2	-1.045	1.231	1.537	2.392	-0.223	0.227	2	5	8	8	6	7	-0.224	0.854558
P78559	Microtubule-associated protein 1A OS=Homo sapiens (Human) OX=9606 GN=MAP1A PE=1 SV=6	MAP1A	Microtubule-associated protein 1A	-3.643	-4.128	-3.626	-2.873	-4.145	-4.122	2	0	1	6	0	2	-0.086	0.858248
P55265	Double-stranded RNA-specific adenosine deaminase OS=Homo sapiens (Human) OX=9606 GN=ADAR PE=1 SV=4	ADAR	Double-stranded RNA-specific adenosine deaminase	-2.438	-3.939	-3.802	-3.23	-4.511	-2.832	2	0	0	1	0	1	0.131	0.859611
P78318	Immunoglobulin-binding protein 1 OS=Homo sapiens (Human) OX=9606 GN=IGBP1 PE=1 SV=1	IGBP1	Immunoglobulin-binding protein 1	-1.932	-4.996	-4.202	-1.354	-4.865	-4.119	1	0	0	2	0	0	-0.264	0.860196
P31150	Rab GDP dissociation inhibitor alpha OS=Homo sapiens (Human) OX=9606 GN=GDI1 PE=1 SV=2	GDI1	Rab GDP dissociation inhibitor alpha	-2.565	-3.721	-2.85	-2.213	-4.061	-3.214	3	1	2	3	0	1	0.118	0.862459
P30511	HLA class I histocompatibility antigen, alpha chain F OS=Homo sapiens (Human) OX=9606 GN=HLA-F PE=1 SV=3	HLA-F	HLA class I histocompatibility antigen, alpha chain F	-5.682	-1.749	-2.751	-0.581	-3.698	-4.947	0	1	1	3	1	0	-0.319	0.864739
P33316	Deoxyuridine 5'-triphosphate nucleotidohydrolase, mitochondrial OS=Homo sapiens (Human) OX=9606 GN=DUT PE=1 SV=4	DUT	Deoxyuridine 5'-triphosphate nucleotidohydrolase, mitochondrial	-2.796	-3.97	-4.381	-2.814	-4.508	-3.462	2	0	1	2	0	0	-0.121	0.868752
Q9UQ35	Serine/arginine repetitive matrix protein 2 OS=Homo sapiens (Human) OX=9606 GN=SRRM2 PE=1 SV=2	SRRM2	Serine/arginine repetitive matrix protein 2	-2.891	-3.939	-3.593	-2.513	-4.364	-3.222	3	0	0	8	1	2	-0.108	0.870217
P02787	Serotransferrin OS=Homo sapiens (Human) OX=9606 GN=TF PE=1 SV=3	TF	Serotransferrin	-1.939	-0.42	-1.751	-1.784	-1.967	0.062	1	5	1	1	2	8	-0.14	0.870635
Q8WUJ3	Cell migration-inducing and hyaluronan-binding protein OS=Homo sapiens (Human) OX=9606 GN=CEMIP PE=1 SV=2	CEMIP	Cell migration-inducing and hyaluronan-binding protein	-3.697	-4.04	-3.853	-5.091	-3.715	-3.091	0	0	2	0	0	3	0.102	0.872687
Q9BTE1	Dynactin subunit 5 OS=Homo sapiens (Human) OX=9606 GN=DCTN5 PE=1 SV=1	DCTN5	Dynactin subunit 5	-2.413	-5.083	-4.035	-3.216	-4.321	-4.432	1	0	0	1	0	0	0.146	0.874684
P08581	Hepatocyte growth factor receptor OS=Homo sapiens (Human) OX=9606 GN=MET PE=1 SV=4	MET	Hepatocyte growth factor receptor	-0.777	-5.25	-3.761	-3.249	-4.01	-3.184	5	0	0	0	0	1	0.218	0.87858
P12268	Inosine-5'-monophosphate dehydrogenase 2 OS=Homo sapiens (Human) OX=9606 GN=IMPDH2 PE=1 SV=2	IMPDH2	Inosine-5'-monophosphate dehydrogenase 2	-4.206	-3.557	-2.96	-1.953	-4.19	-4.178	1	0	1	3	0	1	-0.134	0.879413
P53634	Dipeptidyl peptidase 1 OS=Homo sapiens (Human) OX=9606 GN=CTSC PE=1 SV=2	CTSC	Dipeptidyl peptidase 1	-3.432	-2.55	-0.933	0.346	-3.483	-3.106	1	1	4	5	0	1	-0.224	0.882356
P15121	Aldo-keto reductase family 1 member B1 OS=Homo sapiens (Human) OX=9606 GN=AKR1B1 PE=1 SV=3	AKR1B1	Aldo-keto reductase family 1 member B1	-3.027	-2.076	-2.651	-1.345	-4.074	-2.718	3	1	2	3	2	4	0.128	0.885767
P35318	ADM OS=Homo sapiens (Human) OX=9606 GN=ADM PE=1 SV=1	ADM	ADM	0.231	-2.481	-1.333	-1.52	-3.764	0.987	3	1	1	2	0	3	0.238	0.887642
Q9UN86	Ras GTPase-activating protein-binding protein 2 OS=Homo sapiens (Human) OX=9606 GN=G3BP2 PE=1 SV=2	G3BP2	Ras GTPase-activating protein-binding protein 2	-2.492	-4.105	-2.606	-1.525	-4.233	-3.028	3	1	4	6	0	1	-0.139	0.889588
Q53T59	HCLS1-binding protein 3 OS=Homo sapiens (Human) OX=9606 GN=HS1BP3 PE=1 SV=1	HS1BP3	HCLS1-binding protein 3	-2.6	-4.516	-4.339	-1.874	-4.923	-4.172	1	0	0	2	0	0	-0.162	0.890217
Q9BRA2	Thioredoxin domain-containing protein 17 OS=Homo sapiens (Human) OX=9606 GN=TXNDC17 PE=1 SV=1	TXNDC17	Thioredoxin domain-containing protein 17	-4.974	-1.846	-1.787	-1.858	-3.767	-2.456	1	1	2	2	1	1	-0.175	0.890338
Q676U5	Autophagy-related protein 16-1 OS=Homo sapiens (Human) OX=9606 GN=ATG16L1 PE=1 SV=2	ATG16L1	Autophagy-related protein 16-1	-3.05	-3.583	-4.439	-3.134	-4.343	-3.826	1	0	1	2	0	0	0.077	0.892334
Q29983	MHC class I polypeptide-related sequence A OS=Homo sapiens (Human) OX=9606 GN=MICA PE=1 SV=1	MICA	MHC class I polypeptide-related sequence A	-1.363	-2.977	-4.154	-1.683	-5.002	-2.368	2	1	1	2	0	1	0.186	0.892783
P15586	N-acetylglucosamine-6-sulfatase OS=Homo sapiens (Human) OX=9606 GN=GNS PE=1 SV=3	GNS	N-acetylglucosamine-6-sulfatase	-0.053	0.2	1.864	1.782	-0.92	0.725	7	3	11	10	7	8	0.141	0.893373
P51693	Amyloid-like protein 1 OS=Homo sapiens (Human) OX=9606 GN=APLP1 PE=1 SV=3	APLP1	Amyloid-like protein 1	-2.802	-3.799	-4.019	-3.6	-4.713	-1.933	1	0	0	0	0	4	-0.125	0.895184
P40189	Interleukin-6 receptor subunit beta OS=Homo sapiens (Human) OX=9606 GN=IL6ST PE=1 SV=2	IL6ST	Interleukin-6 receptor subunit beta	-3.734	-4.024	-0.571	-1.072	-3.89	-3.972	1	0	5	5	1	0	0.202	0.896755
Q9UJY5	ADP-ribosylation factor-binding protein GGA1 OS=Homo sapiens (Human) OX=9606 GN=GGA1 PE=1 SV=1	GGA1	ADP-ribosylation factor-binding protein GGA1	-1.828	-2.882	-4.321	-2.945	-3.991	-1.688	2	0	0	1	0	0	-0.136	0.896853
Q9H814	Phosphorylated adapter RNA export protein OS=Homo sapiens (Human) OX=9606 GN=PHAX PE=1 SV=1	PHAX	Phosphorylated adapter RNA export protein	-4.275	-3.212	-4.031	-2.593	-4.552	-4.095	1	0	0	2	0	0	-0.093	0.897049
O14933	Ubiquitin/ISG15-conjugating enzyme E2 L6 OS=Homo sapiens (Human) OX=9606 GN=UBE2L6 PE=1 SV=4	UBE2L6	Ubiquitin/ISG15-conjugating enzyme E2 L6	-3.51	-3.12	-2.784	-2.703	-2.259	-4.197	0	1	1	0	2	0	-0.085	0.897901
O14530	Thioredoxin domain-containing protein 9 OS=Homo sapiens (Human) OX=9606 GN=TXNDC9 PE=1 SV=2	TXNDC9	Thioredoxin domain-containing protein 9	-3.339	-3.267	-3.096	-2.303	-3.437	-4.185	1	0	1	3	0	0	0.074	0.899897
Q92484	Acid sphingomyelinase-like phosphodiesterase 3a OS=Homo sapiens (Human) OX=9606 GN=SMPDL3A PE=1 SV=2	SMPDL3A	Acid sphingomyelinase-like phosphodiesterase 3a	-4.739	-1.363	-1.164	-1.229	-1.737	-4.96	0	0	1	1	1	0	0.22	0.900262
Q969S3	Zinc finger protein 622 OS=Homo sapiens (Human) OX=9606 GN=ZNF622 PE=1 SV=1	ZNF622	Zinc finger protein 622	-4.941	-3.826	-2.129	-2.961	-4.109	-4.18	0	0	1	2	0	0	0.118	0.902836
P17655	Calpain-2 catalytic subunit OS=Homo sapiens (Human) OX=9606 GN=CAPN2 PE=1 SV=6	CAPN2	Calpain-2 catalytic subunit	-2.693	-2.777	-5.089	-2.867	-4.67	-3.392	1	1	1	3	0	1	0.124	0.902861
P09603	Macrophage colony-stimulating factor 1 OS=Homo sapiens (Human) OX=9606 GN=CSF1 PE=1 SV=2	CSF1	Macrophage colony-stimulating factor 1	-1.936	-2.385	-3.005	-1.295	-2.652	-3.133	3	2	5	5	2	1	-0.082	0.903031
P51858	Hepatoma-derived growth factor OS=Homo sapiens (Human) OX=9606 GN=HDGF PE=1 SV=1	HDGF	Hepatoma-derived growth factor	-2.429	-4.839	-3.545	-2.265	-3.772	-4.413	1	1	1	2	1	0	-0.122	0.903744
P12035	Keratin, type II cytoskeletal 3 OS=Homo sapiens (Human) OX=9606 GN=KRT3 PE=1 SV=3	KRT3	Keratin, type II cytoskeletal 3	-4.526	-1.406	-1.491	-0.377	-4.007	-3.635	0	1	4	4	0	2	0.198	0.903918
P31942	Heterogeneous nuclear ribonucleoprotein H3 OS=Homo sapiens (Human) OX=9606 GN=HNRNPH3 PE=1 SV=2	HNRNPH3	Heterogeneous nuclear ribonucleoprotein H3	-2.044	-4.401	-2.545	-1.46	-4.652	-3.316	3	0	3	5	0	1	0.146	0.906716
P48740	Mannan-binding lectin serine protease 1 OS=Homo sapiens (Human) OX=9606 GN=MASP1 PE=1 SV=3	MASP1	Mannan-binding lectin serine protease 1	-3.389	-1.581	0.571	-0.577	-2.402	-1.886	0	1	3	2	3	2	0.155	0.908313
Q99969	Retinoic acid receptor responder protein 2 OS=Homo sapiens (Human) OX=9606 GN=RARRES2 PE=1 SV=1	RARRES2	Retinoic acid receptor responder protein 2	-2.871	-3.491	-3.547	-4.519	-4.356	-0.552	0	0	0	0	0	2	-0.161	0.908628
O14763	Tumor necrosis factor receptor superfamily member 10B OS=Homo sapiens (Human) OX=9606 GN=TNFRSF10B PE=1 SV=2	TNFRSF10B	Tumor necrosis factor receptor superfamily member 10B	-3.614	-4.514	-2.078	-0.791	-4.062	-5.96	1	0	0	1	0	0	0.202	0.909279
Q9Y2Z0	Protein SGT1 homolog OS=Homo sapiens (Human) OX=9606 GN=SUGT1 PE=1 SV=3	SUGT1	Protein SGT1 homolog	-4.406	-4.026	-1.789	-3.018	-3.483	-4.034	0	0	2	1	1	0	0.105	0.909446
Q6UWP8	Suprabasin OS=Homo sapiens (Human) OX=9606 GN=SBSN PE=1 SV=2	SBSN	Suprabasin	-2.419	-3.367	-2.117	-2.279	-3.688	-2.156	6	1	5	6	2	6	0.074	0.911126
P20849	Collagen alpha-1(IX) chain OS=Homo sapiens (Human) OX=9606 GN=COL9A1 PE=1 SV=3	COL9A1	Collagen alpha-1(IX) chain	-3.663	-2.491	-2.295	-2.53	-4.634	-0.877	1	1	2	1	1	3	-0.136	0.912955
O76003	Glutaredoxin-3 OS=Homo sapiens (Human) OX=9606 GN=GLRX3 PE=1 SV=2	GLRX3	Glutaredoxin-3	-2.114	-4.26	-3.202	-1.573	-3.641	-4.022	3	1	1	4	2	1	-0.114	0.913372
P39060	Collagen alpha-1(XVIII) chain OS=Homo sapiens (Human) OX=9606 GN=COL18A1 PE=1 SV=5	COL18A1	Collagen alpha-1(XVIII) chain	0.226	-1.05	-0.946	-0.364	-1.457	0.274	5	3	4	4	4	5	-0.074	0.914747
O43556	Epsilon-sarcoglycan OS=Homo sapiens (Human) OX=9606 GN=SGCE PE=1 SV=6	SGCE	Epsilon-sarcoglycan	-1.222	-1.408	-2.335	-0.439	-2.608	-2.167	3	2	2	4	2	3	0.083	0.916307
P15144	Aminopeptidase N OS=Homo sapiens (Human) OX=9606 GN=ANPEP PE=1 SV=4	ANPEP	Aminopeptidase N	-3.522	-3.855	-4.861	-4.401	-5.573	-2.585	2	0	0	1	0	2	0.107	0.916465
Q96AT9	Ribulose-phosphate 3-epimerase OS=Homo sapiens (Human) OX=9606 GN=RPE PE=1 SV=1	RPE	Ribulose-phosphate 3-epimerase	-3.819	-2.107	-1.251	-1.228	-3.151	-2.485	0	1	1	1	1	0	-0.104	0.91732
O14773	Tripeptidyl-peptidase 1 OS=Homo sapiens (Human) OX=9606 GN=TPP1 PE=1 SV=2	TPP1	Tripeptidyl-peptidase 1	-1.747	-1.932	1.182	1.455	-3.144	-1.362	2	2	4	4	1	3	0.185	0.91762
P55735	Protein SEC13 homolog OS=Homo sapiens (Human) OX=9606 GN=SEC13 PE=1 SV=3	SEC13	Protein SEC13 homolog	-4.62	-5.472	-1.94	-5.018	-1.76	-4.762	0	1	1	0	1	0	-0.164	0.917867
P18085	ADP-ribosylation factor 4 OS=Homo sapiens (Human) OX=9606 GN=ARF4 PE=1 SV=3	ARF4	ADP-ribosylation factor 4	-3.596	-2.829	-2.942	-3.314	-4.613	-1.104	0	1	1	1	0	2	-0.112	0.920204
P05155	Plasma protease C1 inhibitor OS=Homo sapiens (Human) OX=9606 GN=SERPING1 PE=1 SV=2	SERPING1	Plasma protease C1 inhibitor	-2.228	-2.866	-3.282	-1.478	-4.036	-2.607	1	1	2	2	0	1	-0.085	0.920716
O43252	Bifunctional 3'-phosphoadenosine 5'-phosphosulfate synthase 1 OS=Homo sapiens (Human) OX=9606 GN=PAPSS1 PE=1 SV=2	PAPSS1	Bifunctional 3'-phosphoadenosine 5'-phosphosulfate synthase 1	-2.499	-3.57	-2.533	-1.183	-4.236	-2.884	2	0	2	6	0	1	-0.099	0.921683
P23497	Nuclear autoantigen Sp-100 OS=Homo sapiens (Human) OX=9606 GN=SP100 PE=1 SV=3	SP100	Nuclear autoantigen Sp-100	-3.448	-5.141	-2.448	-1.9	-5.189	-4.344	1	0	1	1	0	0	0.132	0.921966
Q13428	Treacle protein OS=Homo sapiens (Human) OX=9606 GN=TCOF1 PE=1 SV=3	TCOF1	Treacle protein	-2.382	-1.534	-4.018	-1.284	-4.807	-2.237	2	1	1	1	0	0	0.131	0.923424
Q92688	Acidic leucine-rich nuclear phosphoprotein 32 family member B OS=Homo sapiens (Human) OX=9606 GN=ANP32B PE=1 SV=1	ANP32B	Acidic leucine-rich nuclear phosphoprotein 32 family member B	-1.247	-4.443	-2.514	-0.412	-4.259	-3.985	3	0	3	4	0	0	0.151	0.927217
E9PAV3	Nascent polypeptide-associated complex subunit alpha, muscle-specific form OS=Homo sapiens (Human) OX=9606 GN=NACA PE=1 SV=1	NACA	Nascent polypeptide-associated complex subunit alpha, muscle-specific form	-1.873	-1.958	-0.936	-0.181	-2.991	-1.851	3	3	5	5	3	4	0.085	0.927218
P17987	T-complex protein 1 subunit alpha OS=Homo sapiens (Human) OX=9606 GN=TCP1 PE=1 SV=1	TCP1	T-complex protein 1 subunit alpha	-2.977	-4.536	-2.908	-2.426	-4.326	-3.892	4	1	2	4	0	2	0.074	0.928976
P13674	Prolyl 4-hydroxylase subunit alpha-1 OS=Homo sapiens (Human) OX=9606 GN=P4HA1 PE=1 SV=2	P4HA1	Prolyl 4-hydroxylase subunit alpha-1	-3.033	-4.41	-4.035	-2.265	-3.715	-5.229	1	0	2	4	1	0	-0.09	0.929157
Q9Y5T4	DnaJ homolog subfamily C member 15 OS=Homo sapiens (Human) OX=9606 GN=DNAJC15 PE=1 SV=2	DNAJC15	DnaJ homolog subfamily C member 15	-1.238	-4.148	-3.81	-2.489	-2.364	-4.679	0	0	0	1	1	0	0.112	0.929403
P19971	Thymidine phosphorylase OS=Homo sapiens (Human) OX=9606 GN=TYMP PE=1 SV=2	TYMP	Thymidine phosphorylase	-4.33	-3.944	-3.334	-2.06	-4.858	-4.97	0	1	1	2	0	0	0.094	0.929557
Q96JY6	PDZ and LIM domain protein 2 OS=Homo sapiens (Human) OX=9606 GN=PDLIM2 PE=1 SV=1	PDLIM2	PDZ and LIM domain protein 2	-1.066	-2.302	-4.03	-1.111	-5.145	-1.571	1	0	0	2	0	1	0.143	0.930266
P49189	4-trimethylaminobutyraldehyde dehydrogenase OS=Homo sapiens (Human) OX=9606 GN=ALDH9A1 PE=1 SV=3	ALDH9A1	4-trimethylaminobutyraldehyde dehydrogenase	-2.737	-3.408	-2.526	-2.571	-2.951	-3.24	3	4	4	6	2	3	0.03	0.93068
O00151	PDZ and LIM domain protein 1 OS=Homo sapiens (Human) OX=9606 GN=PDLIM1 PE=1 SV=4	PDLIM1	PDZ and LIM domain protein 1	-4.064	-2.62	-1.567	-1.945	-3.302	-2.777	2	2	6	4	2	1	-0.076	0.931107
P06702	Protein S100-A9 OS=Homo sapiens (Human) OX=9606 GN=S100A9 PE=1 SV=1	S100A9	Protein S100-A9	1.033	0.353	2.079	1.817	-0.114	1.552	5	4	6	6	4	5	0.07	0.933549
P22413	Ectonucleotide pyrophosphatase/phosphodiesterase family member 1 OS=Homo sapiens (Human) OX=9606 GN=ENPP1 PE=1 SV=2	ENPP1	Ectonucleotide pyrophosphatase/phosphodiesterase family member 1	-0.645	-4.03	-4.44	-2.472	-4.677	-2.332	1	0	0	1	0	0	0.122	0.935673
P28300	Protein-lysine 6-oxidase OS=Homo sapiens (Human) OX=9606 GN=LOX PE=1 SV=2	LOX	Protein-lysine 6-oxidase	0.647	-0.908	0.522	-0.964	-0.416	1.416	8	4	8	5	6	8	0.075	0.935848
Q9H223	EH domain-containing protein 4 OS=Homo sapiens (Human) OX=9606 GN=EHD4 PE=1 SV=1	EHD4	EH domain-containing protein 4	-1.87	-1.981	-2.297	-1.181	-3.016	-2.077	0	0	0	2	1	0	0.042	0.942063
O00170	AH receptor-interacting protein OS=Homo sapiens (Human) OX=9606 GN=AIP PE=1 SV=2	AIP	AH receptor-interacting protein	-2.398	-4.916	-2.794	-1.863	-4.492	-4.012	1	0	0	1	0	0	0.087	0.942337
Q99574	Neuroserpin OS=Homo sapiens (Human) OX=9606 GN=SERPINI1 PE=1 SV=1	SERPINI1	Neuroserpin	-3.333	-4.214	-4.01	-4.467	-3.172	-3.813	2	0	0	0	2	2	-0.035	0.942795
Q14315	Filamin-C OS=Homo sapiens (Human) OX=9606 GN=FLNC PE=1 SV=3	FLNC	Filamin-C	-2.73	-3.372	-3.068	-2.817	-3.895	-2.349	20	6	11	17	8	31	-0.036	0.945291
Q9NZJ9	Diphosphoinositol polyphosphate phosphohydrolase 2 OS=Homo sapiens (Human) OX=9606 GN=NUDT4 PE=1 SV=2	NUDT4	Diphosphoinositol polyphosphate phosphohydrolase 2	-3.862	-3.18	-4.293	-1.654	-4.73	-4.716	1	1	1	2	0	0	-0.078	0.945307
P30043	Flavin reductase (NADPH) OS=Homo sapiens (Human) OX=9606 GN=BLVRB PE=1 SV=3	BLVRB	Flavin reductase (NADPH)	-4.185	-1.363	-3.371	-2.489	-3.612	-3.012	1	1	1	3	1	1	0.065	0.945646
P20062	Transcobalamin-2 OS=Homo sapiens (Human) OX=9606 GN=TCN2 PE=1 SV=3	TCN2	Transcobalamin-2	-4.125	-3.366	-2.804	-3.344	-2.786	-4.05	2	2	3	3	3	1	-0.038	0.945964
Q99439	Calponin-2 OS=Homo sapiens (Human) OX=9606 GN=CNN2 PE=1 SV=4	CNN2	Calponin-2	-2.525	-2.573	-3.284	-1.774	-3.76	-2.715	4	3	4	5	3	4	-0.045	0.946198
P08133	Annexin A6 OS=Homo sapiens (Human) OX=9606 GN=ANXA6 PE=1 SV=3	ANXA6	Annexin A6	-3.885	-4.563	-4.133	-5.165	-4.404	-2.861	0	0	0	0	1	5	-0.05	0.946559
Q13838	Spliceosome RNA helicase DDX39B OS=Homo sapiens (Human) OX=9606 GN=DDX39B PE=1 SV=1	DDX39B	Spliceosome RNA helicase DDX39B	-1.934	-3.604	-2.516	-2.583	-3.131	-2.224	2	1	2	3	0	1	-0.039	0.947899
O60911	Cathepsin L2 OS=Homo sapiens (Human) OX=9606 GN=CTSV PE=1 SV=2	CTSV	Cathepsin L2	-3.608	-3.571	-2.609	-4.075	-3.404	-2.427	1	0	1	1	0	2	0.04	0.948533
Q14258	E3 ubiquitin/ISG15 ligase TRIM25 OS=Homo sapiens (Human) OX=9606 GN=TRIM25 PE=1 SV=2	TRIM25	E3 ubiquitin/ISG15 ligase TRIM25	0.044	-1.406	-0.977	0.26	0.415	-2.793	1	0	0	2	0	1	-0.074	0.951159
P10599	Thioredoxin OS=Homo sapiens (Human) OX=9606 GN=TXN PE=1 SV=3	TXN	Thioredoxin	-0.285	-1.072	0.589	-0.263	-1.354	0.701	1	1	2	1	1	2	0.05	0.9514
P25815	Protein S100-P OS=Homo sapiens (Human) OX=9606 GN=S100P PE=1 SV=2	S100P	Protein S100-P	-5.341	-1.664	-1.906	-2.832	-3.856	-1.98	0	1	1	0	0	1	-0.081	0.953329
P19525	Interferon-induced, double-stranded RNA-activated protein kinase OS=Homo sapiens (Human) OX=9606 GN=EIF2AK2 PE=1 SV=2	EIF2AK2	Interferon-induced, double-stranded RNA-activated protein kinase	-2.723	-3.539	-1.524	-0.236	-4.112	-3.204	2	1	3	4	1	1	-0.078	0.95523
P01584	Interleukin-1 beta OS=Homo sapiens (Human) OX=9606 GN=IL1B PE=1 SV=2	IL1B	Interleukin-1 beta	-2.176	-2.104	-2.046	-1.619	-2.895	-1.739	1	4	4	6	4	5	-0.024	0.955354
O75340	Programmed cell death protein 6 OS=Homo sapiens (Human) OX=9606 GN=PDCD6 PE=1 SV=1	PDCD6	Programmed cell death protein 6	-1.085	-2.52	-0.831	-1.175	-4.331	0.788	0	0	1	0	0	1	0.094	0.955523
O95816	BAG family molecular chaperone regulator 2 OS=Homo sapiens (Human) OX=9606 GN=BAG2 PE=1 SV=1	BAG2	BAG family molecular chaperone regulator 2	-3.15	-3.147	-2.703	-1.185	-3.37	-4.284	0	0	2	3	0	0	-0.054	0.95684
Q9NPF2	Carbohydrate sulfotransferase 11 OS=Homo sapiens (Human) OX=9606 GN=CHST11 PE=1 SV=1	CHST11	Carbohydrate sulfotransferase 11	-2.812	-3.856	-2.918	-2.128	-3.898	-3.673	2	2	2	2	1	2	0.037	0.956909
O00622	CCN family member 1 OS=Homo sapiens (Human) OX=9606 GN=CCN1 PE=1 SV=1	CCN1	CCN family member 1	-1.405	-1.677	-1.865	-2.164	-2.124	-0.742	5	4	4	4	4	5	0.028	0.957317
P52788	Spermine synthase OS=Homo sapiens (Human) OX=9606 GN=SMS PE=1 SV=2	SMS	Spermine synthase	-1.861	-3.88	-4.176	-1.831	-2.96	-5.331	1	1	0	3	0	0	0.068	0.959448
Q9NUL5	Shiftless antiviral inhibitor of ribosomal frameshifting protein OS=Homo sapiens (Human) OX=9606 GN=SHFL PE=1 SV=2	SHFL	Shiftless antiviral inhibitor of ribosomal frameshifting protein	-4.087	-3.654	-2.42	-1.33	-4.782	-4.236	1	0	1	3	0	0	0.062	0.960582
Q8WX93	Palladin OS=Homo sapiens (Human) OX=9606 GN=PALLD PE=1 SV=3	PALLD	Palladin	-2.944	-3.316	-2.172	-2.081	-4.482	-1.725	4	2	6	6	3	5	-0.048	0.961177
P14210	Hepatocyte growth factor OS=Homo sapiens (Human) OX=9606 GN=HGF PE=1 SV=2	HGF	Hepatocyte growth factor	-3.625	-1.755	0.681	1.473	-2.596	-3.89	0	4	10	11	4	1	0.105	0.961565
Q9H910	Jupiter microtubule associated homolog 2 OS=Homo sapiens (Human) OX=9606 GN=JPT2 PE=1 SV=1	JPT2	Jupiter microtubule associated homolog 2	-0.945	-3.089	-2.867	-1.636	-3.098	-2.285	2	1	2	1	2	0	0.039	0.963285
Q9BXJ1	Complement C1q tumor necrosis factor-related protein 1 OS=Homo sapiens (Human) OX=9606 GN=C1QTNF1 PE=1 SV=1	C1QTNF1	Complement C1q tumor necrosis factor-related protein 1	-1.096	-2.013	-3.591	-0.023	-3.441	-3.426	1	0	1	2	0	0	0.064	0.964697
O00461	Golgi integral membrane protein 4 OS=Homo sapiens (Human) OX=9606 GN=GOLIM4 PE=1 SV=1	GOLIM4	Golgi integral membrane protein 4	-4.373	-4.023	-4.363	-3.425	-5.249	-4.008	0	0	0	2	0	0	-0.026	0.965094
P81605	Dermcidin OS=Homo sapiens (Human) OX=9606 GN=DCD PE=1 SV=2	DCD	Dermcidin	0.908	1.736	1.667	1.372	-0.029	3.09	2	3	3	3	2	5	-0.04	0.96776
P24752	Acetyl-CoA acetyltransferase, mitochondrial OS=Homo sapiens (Human) OX=9606 GN=ACAT1 PE=1 SV=1	ACAT1	Acetyl-CoA acetyltransferase, mitochondrial	-3.628	-4.139	-4.527	-3.2	-4.958	-4.209	0	0	0	3	0	2	0.024	0.968091
P98066	Tumor necrosis factor-inducible gene 6 protein OS=Homo sapiens (Human) OX=9606 GN=TNFAIP6 PE=1 SV=2	TNFAIP6	Tumor necrosis factor-inducible gene 6 protein	-3.058	-2.122	-1.94	-0.954	-3.375	-2.69	1	0	2	4	3	2	-0.034	0.96821
Q9UNF0	Protein kinase C and casein kinase substrate in neurons protein 2 OS=Homo sapiens (Human) OX=9606 GN=PACSIN2 PE=1 SV=2	PACSIN2	Protein kinase C and casein kinase substrate in neurons protein 2	-2.964	-3.66	-2.726	-1.489	-4.331	-3.423	4	3	4	7	2	3	-0.036	0.969874
P20742	Pregnancy zone protein OS=Homo sapiens (Human) OX=9606 GN=PZP PE=1 SV=4	PZP	Pregnancy zone protein	-0.961	-2.673	-1.998	-1.657	-3.231	-0.847	0	0	0	1	0	1	0.034	0.970189
P48745	CCN family member 3 OS=Homo sapiens (Human) OX=9606 GN=CCN3 PE=1 SV=1	CCN3	CCN family member 3	-2.353	-4.9	-2.691	-2.45	-3.436	-3.971	0	0	1	1	0	1	-0.029	0.975842
Q96EI5	Transcription elongation factor A protein-like 4 OS=Homo sapiens (Human) OX=9606 GN=TCEAL4 PE=1 SV=2	TCEAL4	Transcription elongation factor A protein-like 4	-2.382	-4.124	-3.93	-2.028	-4.283	-4.057	1	0	0	1	0	0	-0.022	0.98154
P12107	Collagen alpha-1(XI) chain OS=Homo sapiens (Human) OX=9606 GN=COL11A1 PE=1 SV=4	COL11A1	Collagen alpha-1(XI) chain	-3.528	-2.772	-1.532	-2.394	-2.936	-2.545	1	2	7	4	2	3	0.014	0.98228
Q9NR99	Matrix-remodeling-associated protein 5 OS=Homo sapiens (Human) OX=9606 GN=MXRA5 PE=1 SV=3	MXRA5	Matrix-remodeling-associated protein 5	-4.282	-4.398	-1.796	-1.757	-4.109	-4.526	0	0	7	9	0	0	-0.028	0.982694
Q9BRK3	Matrix remodeling-associated protein 8 OS=Homo sapiens (Human) OX=9606 GN=MXRA8 PE=1 SV=1	MXRA8	Matrix remodeling-associated protein 8	1.584	-0.505	0.125	0.863	-1.216	1.623	7	5	6	6	5	6	-0.022	0.984282
Q9UBG0	C-type mannose receptor 2 OS=Homo sapiens (Human) OX=9606 GN=MRC2 PE=1 SV=2	MRC2	C-type mannose receptor 2	-1.74	-5.407	-2.481	-3.424	-4.001	-2.136	1	0	0	0	1	1	-0.022	0.986676
P04003	C4b-binding protein alpha chain OS=Homo sapiens (Human) OX=9606 GN=C4BPA PE=1 SV=2	C4BPA	C4b-binding protein alpha chain	-2.613	-2.025	-2.353	-3.182	-0.542	-3.314	1	1	1	1	3	0	0.015	0.987398
Q9NUG6	p53 and DNA damage-regulated protein 1 OS=Homo sapiens (Human) OX=9606 GN=PDRG1 PE=1 SV=2	PDRG1	p53 and DNA damage-regulated protein 1	-2.39	-5.228	-2.054	-2.493	-2.388	-4.843	1	0	0	1	0	0	0.017	0.989813
P78417	Glutathione S-transferase omega-1 OS=Homo sapiens (Human) OX=9606 GN=GSTO1 PE=1 SV=2	GSTO1	Glutathione S-transferase omega-1	-1.246	-2.67	-1.537	0.027	-3.257	-2.183	6	4	6	9	4	7	-0.013	0.99058
Q9H013	Disintegrin and metalloproteinase domain-containing protein 19 OS=Homo sapiens (Human) OX=9606 GN=ADAM19 PE=1 SV=3	ADAM19	Disintegrin and metalloproteinase domain-containing protein 19	-0.163	0.375	1.825	2.48	0.24	-0.722	3	3	3	5	4	3	0.013	0.991527
Q9BQT9	Calsyntenin-3 OS=Homo sapiens (Human) OX=9606 GN=CLSTN3 PE=1 SV=1	CLSTN3	Calsyntenin-3	-3.919	-4.333	-3.988	-3.153	-4.205	-4.898	2	1	1	4	4	0	0.006	0.99207
P52597	Heterogeneous nuclear ribonucleoprotein F OS=Homo sapiens (Human) OX=9606 GN=HNRNPF PE=1 SV=3	HNRNPF	Heterogeneous nuclear ribonucleoprotein F	-1.973	-3.186	-2.456	-1.594	-3.802	-2.196	3	1	3	3	1	2	-0.007	0.992939
P01130	Low-density lipoprotein receptor OS=Homo sapiens (Human) OX=9606 GN=LDLR PE=1 SV=1	LDLR	Low-density lipoprotein receptor	-1.572	-3.066	-2.699	-0.54	-3.253	-3.571	2	2	2	4	2	1	0.009	0.993678
O95757	Heat shock 70 kDa protein 4L OS=Homo sapiens (Human) OX=9606 GN=HSPA4L PE=1 SV=3	HSPA4L	Heat shock 70 kDa protein 4L	-1.55	-4.23	-3.645	-1.224	-2.847	-5.32	2	0	0	1	0	0	-0.011	0.994118
P10153	Non-secretory ribonuclease OS=Homo sapiens (Human) OX=9606 GN=RNASE2 PE=1 SV=2	RNASE2	Non-secretory ribonuclease	-2.669	-4.667	-4.422	-4.586	-2.044	-5.111	1	0	0	0	1	0	-0.005	0.996375
P62805	Histone H4 OS=Homo sapiens (Human) OX=9606 GN=H4C14 PE=1 SV=2	H4C14	Histone H4	0.681	1.028	1.076	0.939	-0.225	2.081	4	4	5	5	4	5	-0.003	0.996412
Q04637	Eukaryotic translation initiation factor 4 gamma 1 OS=Homo sapiens (Human) OX=9606 GN=EIF4G1 PE=1 SV=4	EIF4G1	Eukaryotic translation initiation factor 4 gamma 1	-3.032	-4.253	-4.222	-3.424	-4.441	-3.636	2	0	1	3	0	1	-0.002	0.997415
P54136	Arginine--tRNA ligase, cytoplasmic OS=Homo sapiens (Human) OX=9606 GN=RARS1 PE=1 SV=2	RARS1	Arginine--tRNA ligase, cytoplasmic	-3.475	-3.515	-4.935	-2.524	-5.329	-4.063	1	0	1	3	0	1	-0.003	0.997712
P28074	Proteasome subunit beta type-5 OS=Homo sapiens (Human) OX=9606 GN=PSMB5 PE=1 SV=3	PSMB5	Proteasome subunit beta type-5	-4.827	-3.476	-2.955	-3.428	-3.648	-4.184	0	1	1	0	0	1	0.001	0.99914
Q9Y663	Heparan sulfate glucosamine 3-O-sulfotransferase 3A1 OS=Homo sapiens (Human) OX=9606 GN=HS3ST3A1 PE=1 SV=1	HS3ST3A1	Heparan sulfate glucosamine 3-O-sulfotransferase 3A1	-2.634	-4.499	-2.892	-4.034	-2.964	-3.026	1	0	0	1	1	0	0	0.999576
